# Supplementary material for: BAIT: Organizing genomes and mapping rearrangements in single cells
Source: PubMed Central journal article supplement (PMC3971352; doi:10.1186/gm486), 2013-09-13

# SCE EVENTS PLOT FOR FINAL (200000 window)

SCE events= 505

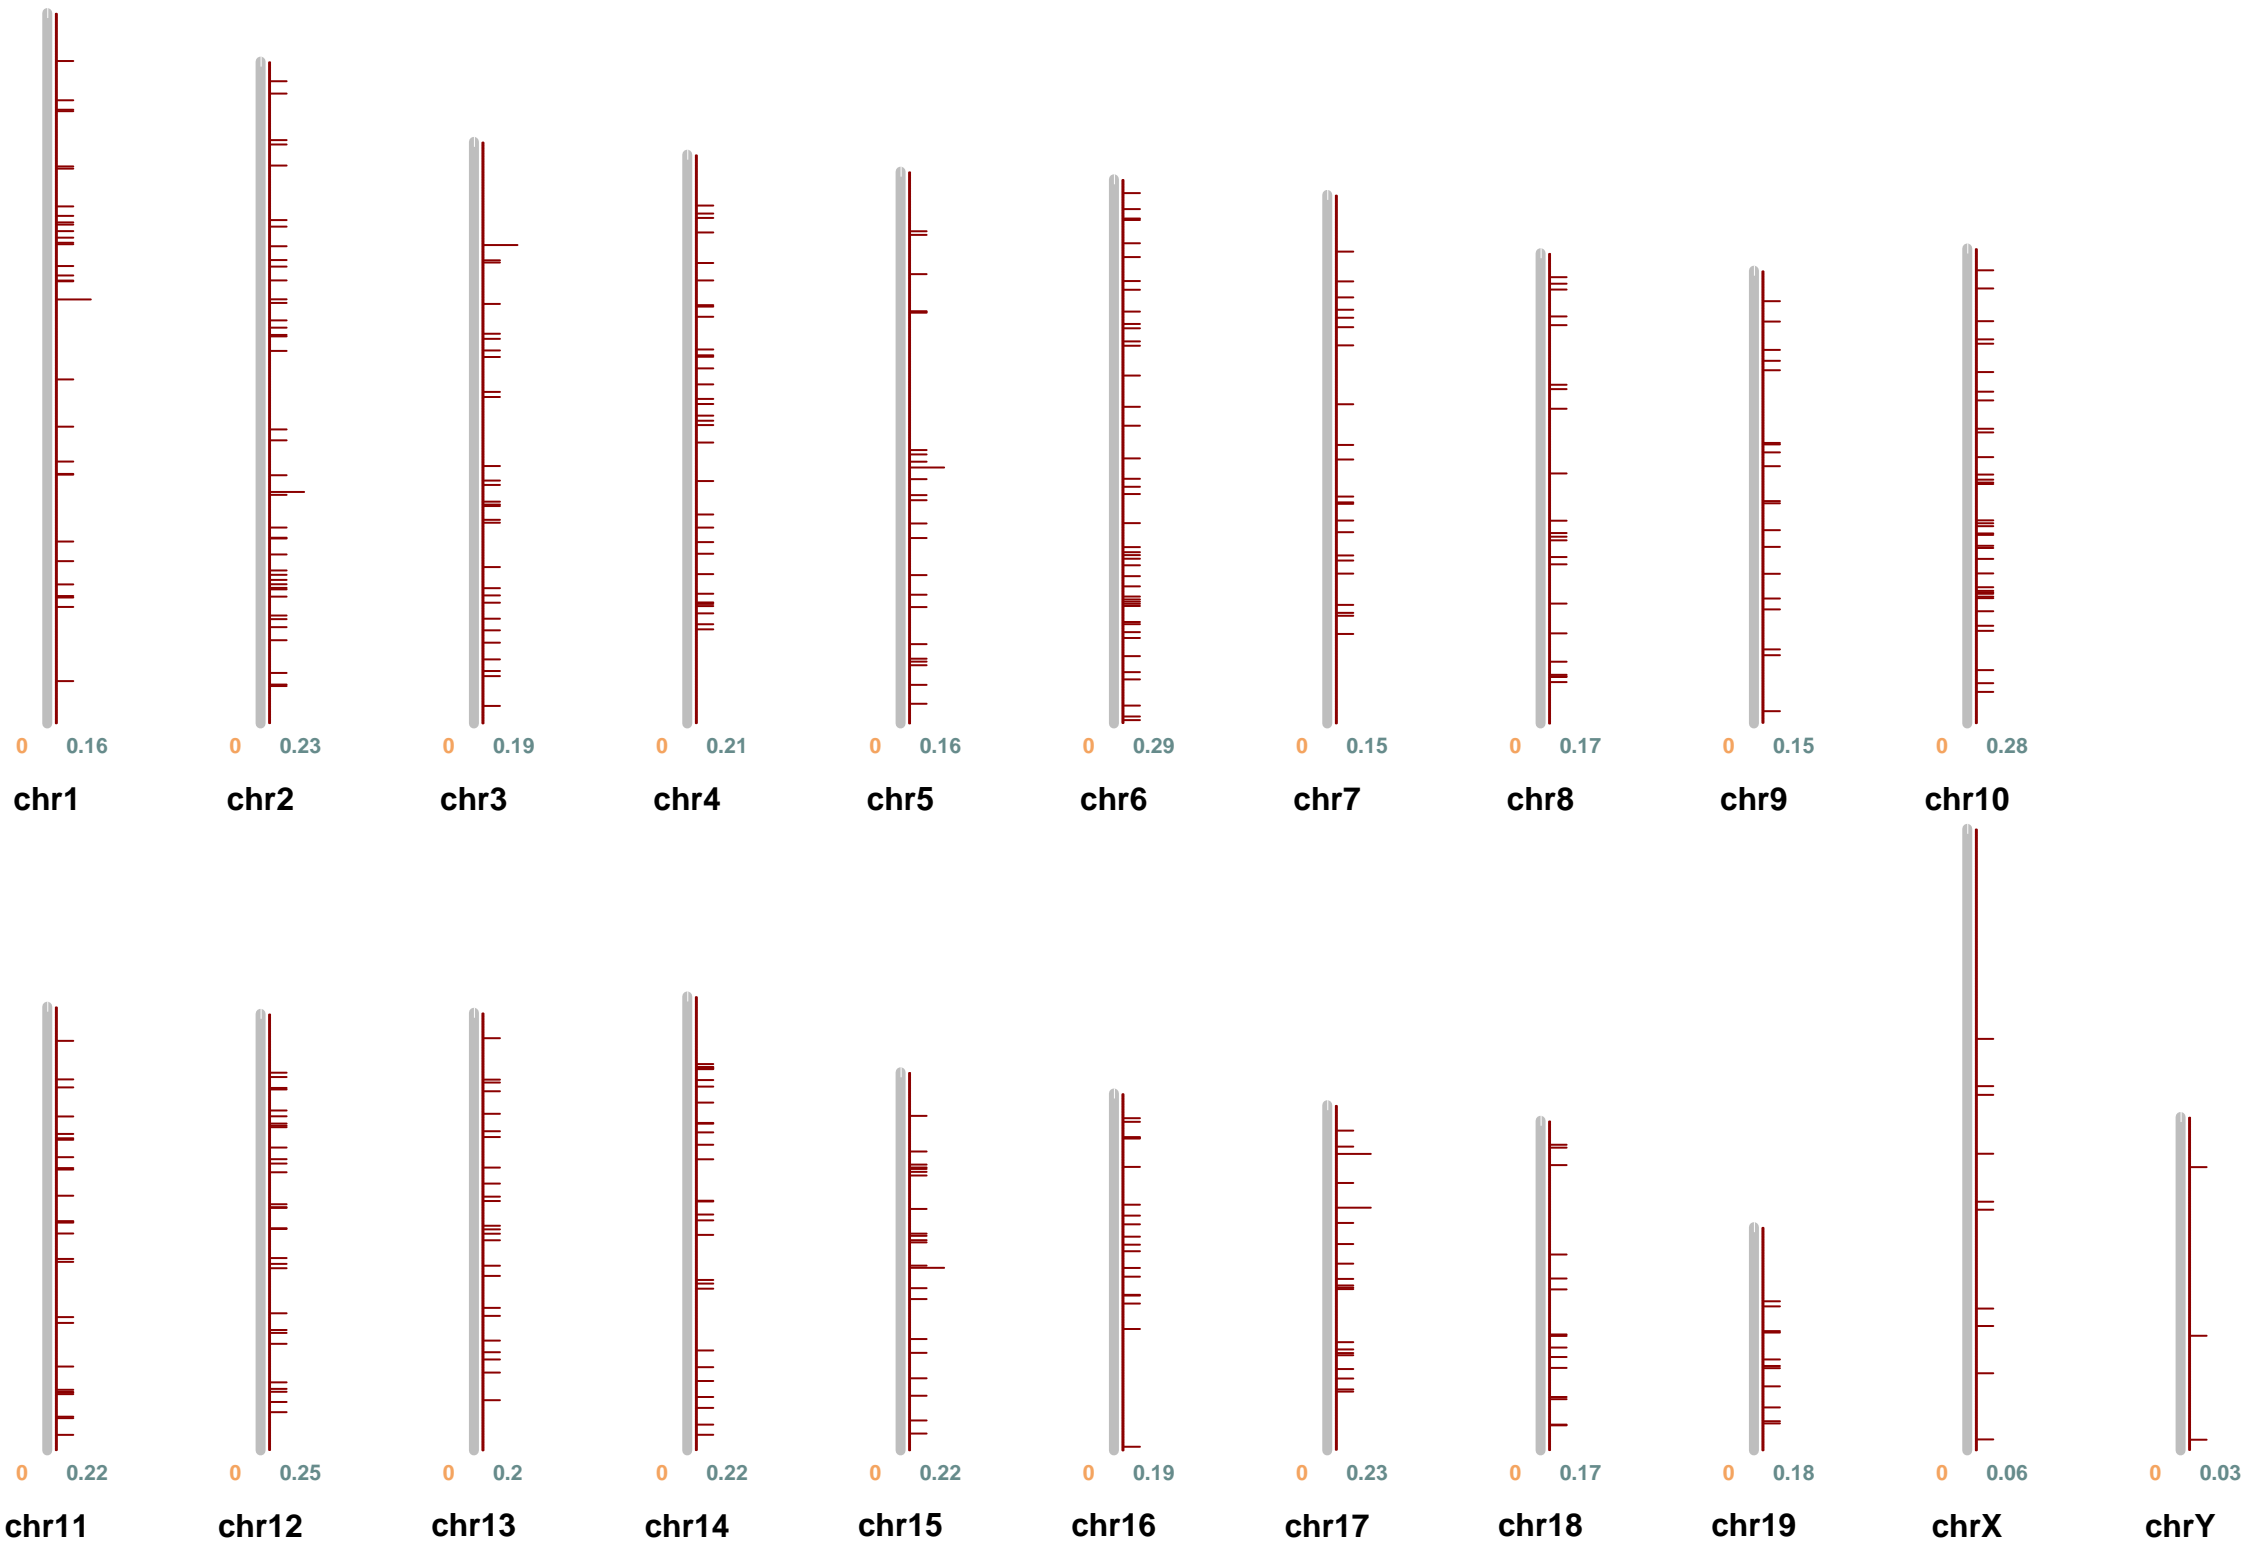

Quality filter=20 Organism=Mus\_musculus

Aneuploid chromosomes 0

Normalized counts / Mb = 0.2 Scale = 0.12

# SCE EVENTS PLOT FOR FINAL (1e+06 window)

SCE events= 505

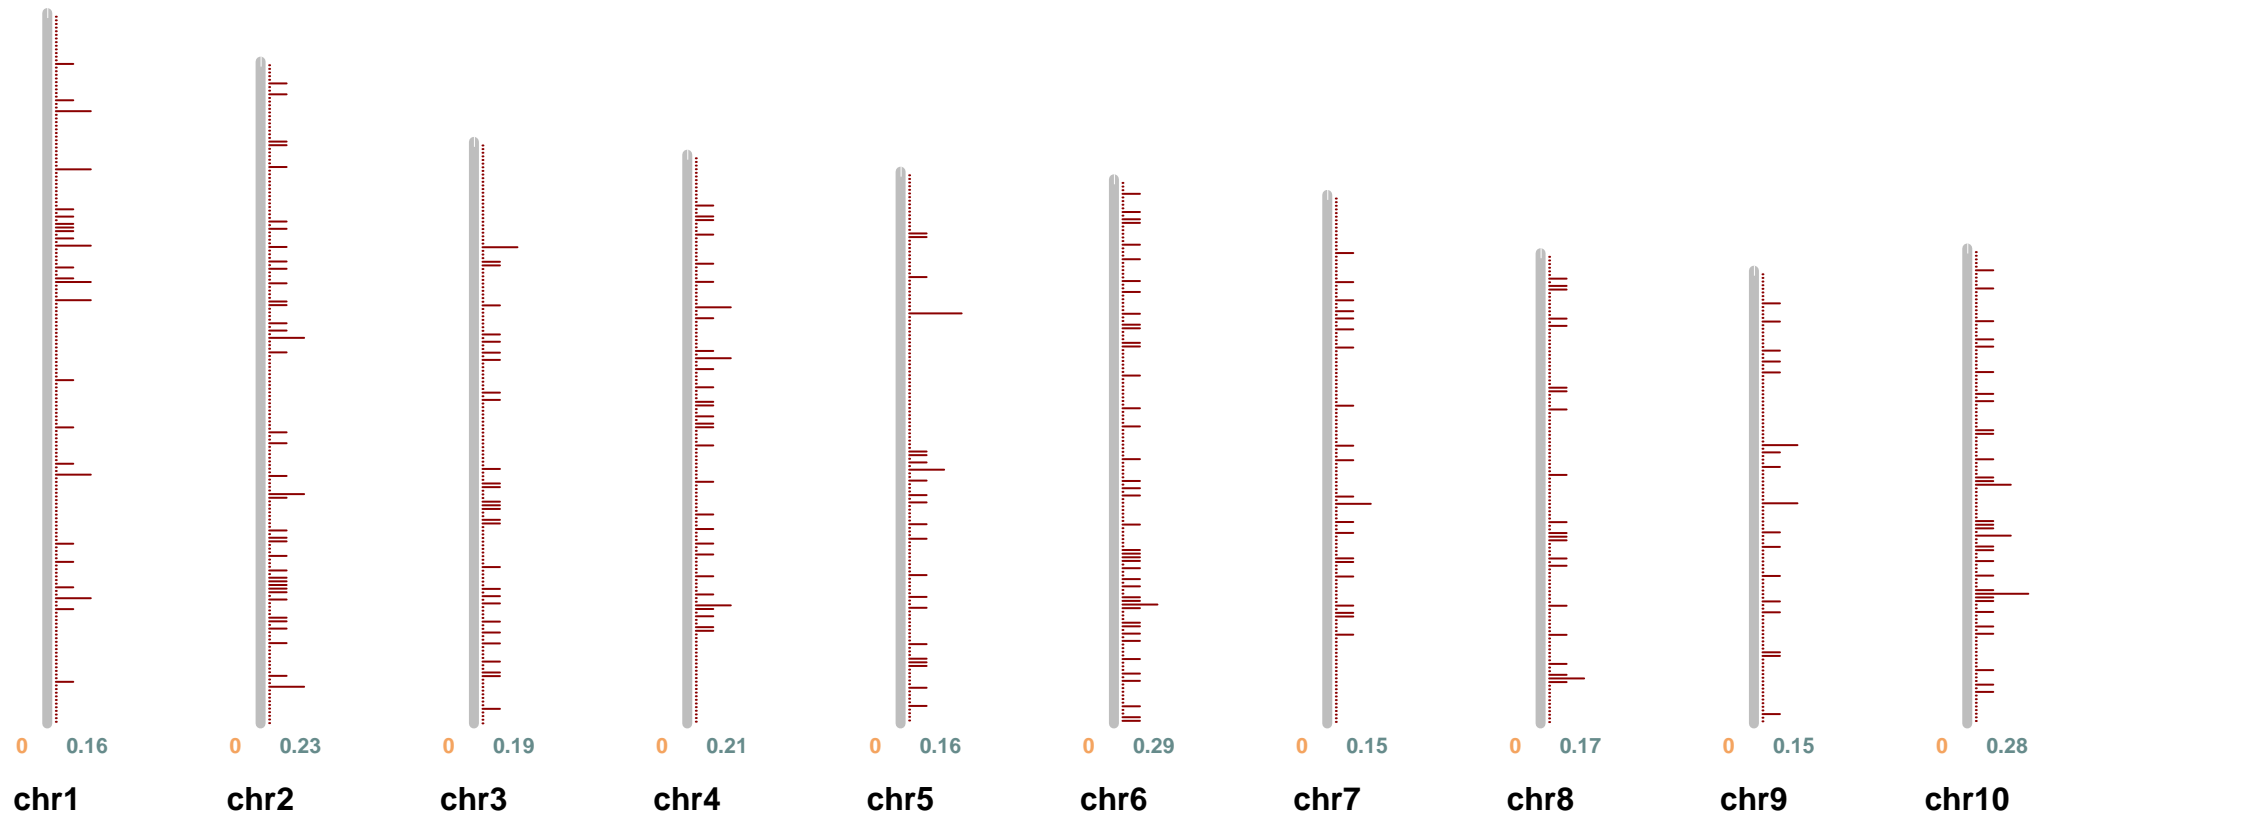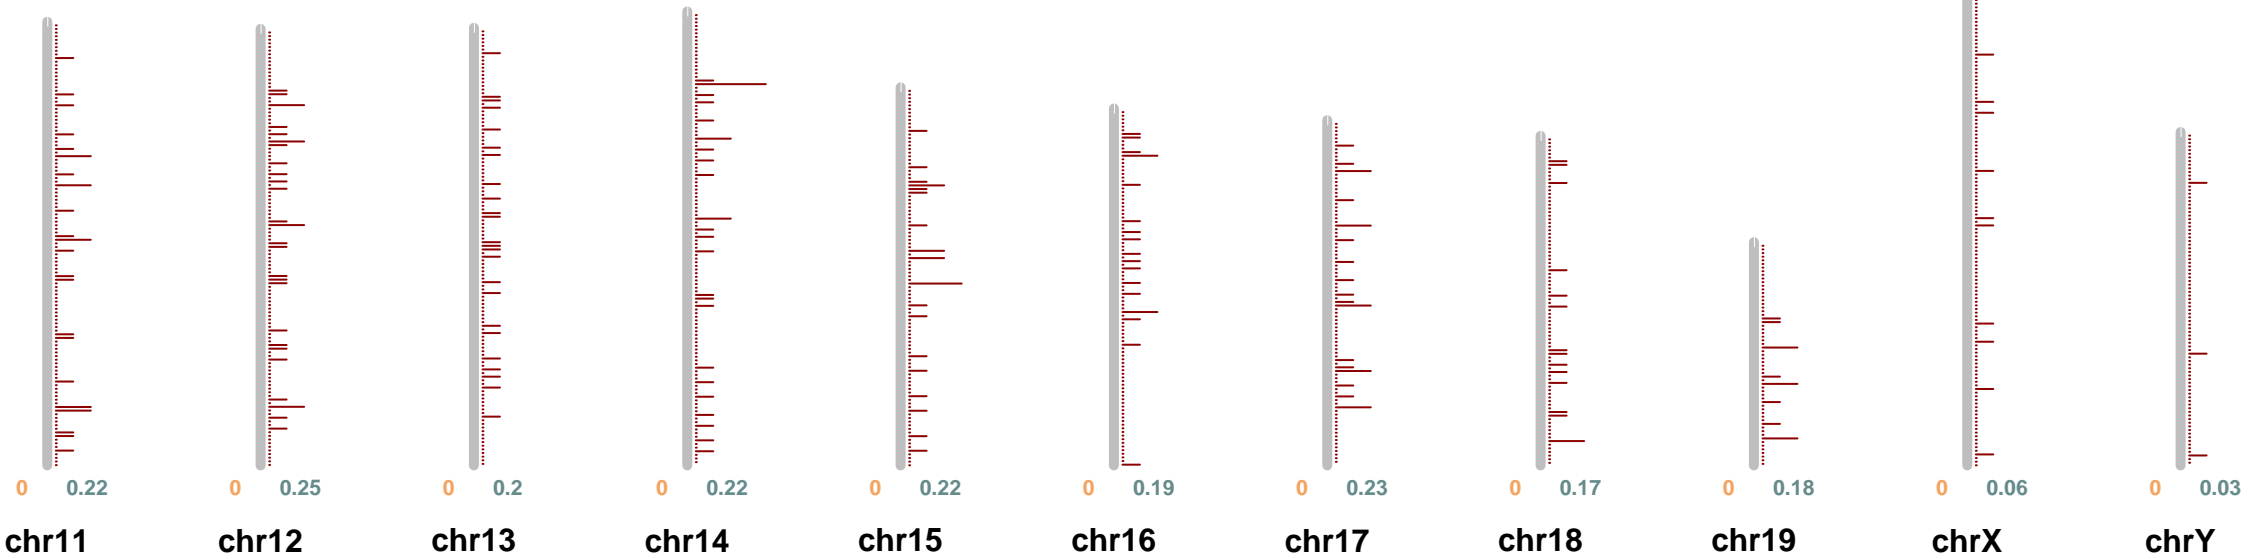

Quality filter=20 Organism=Mus\_musculus

Aneuploid chromosomes 0

Normalized counts / Mb = 0.2 Scale = 0.12

Histogram of distance between SCE intervals

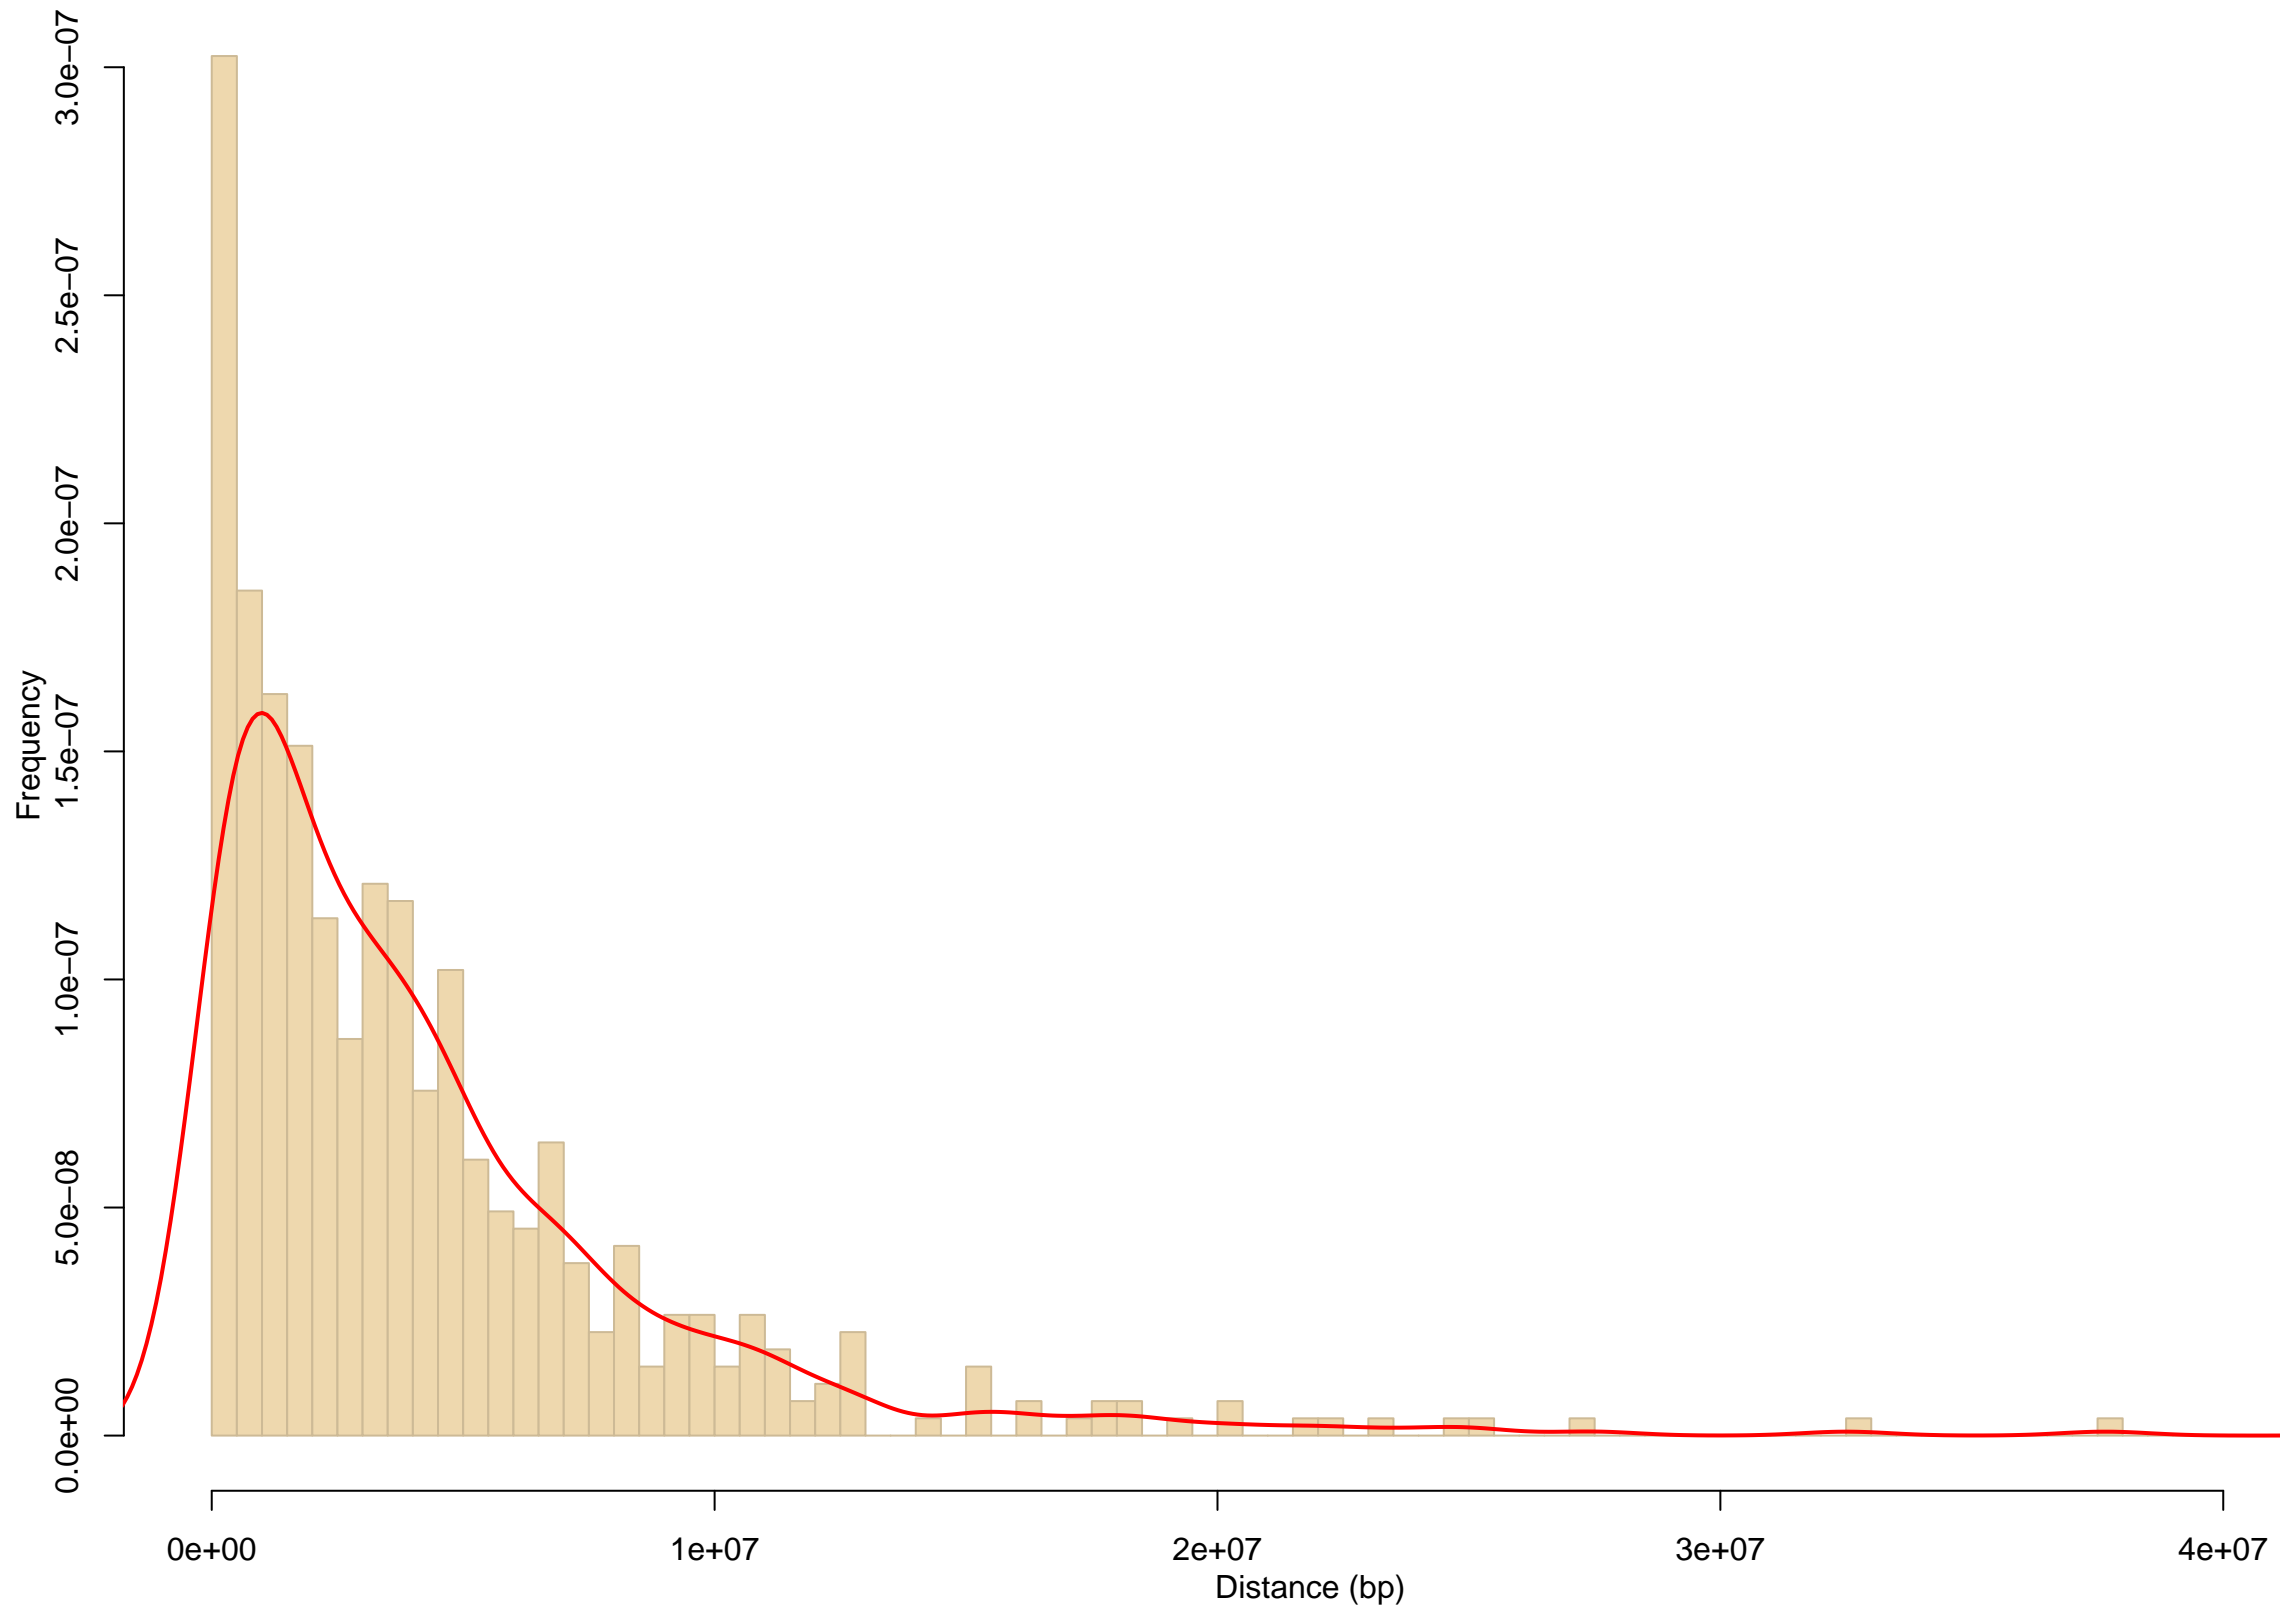

# SWITCH EVENTS PLOT FOR FINAL Organism=Mus\_musculus

Switch events= 45

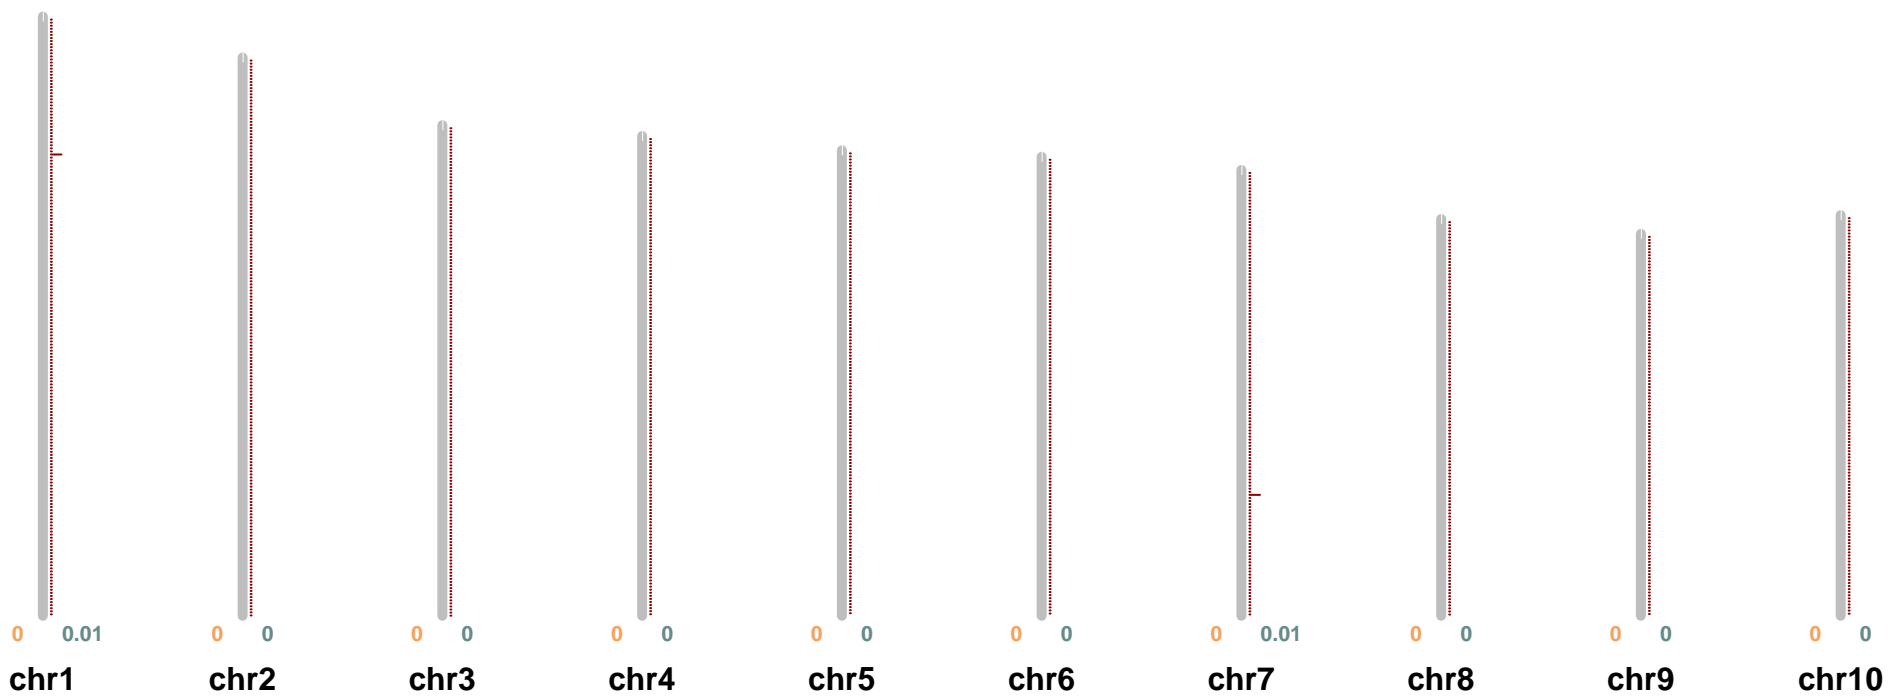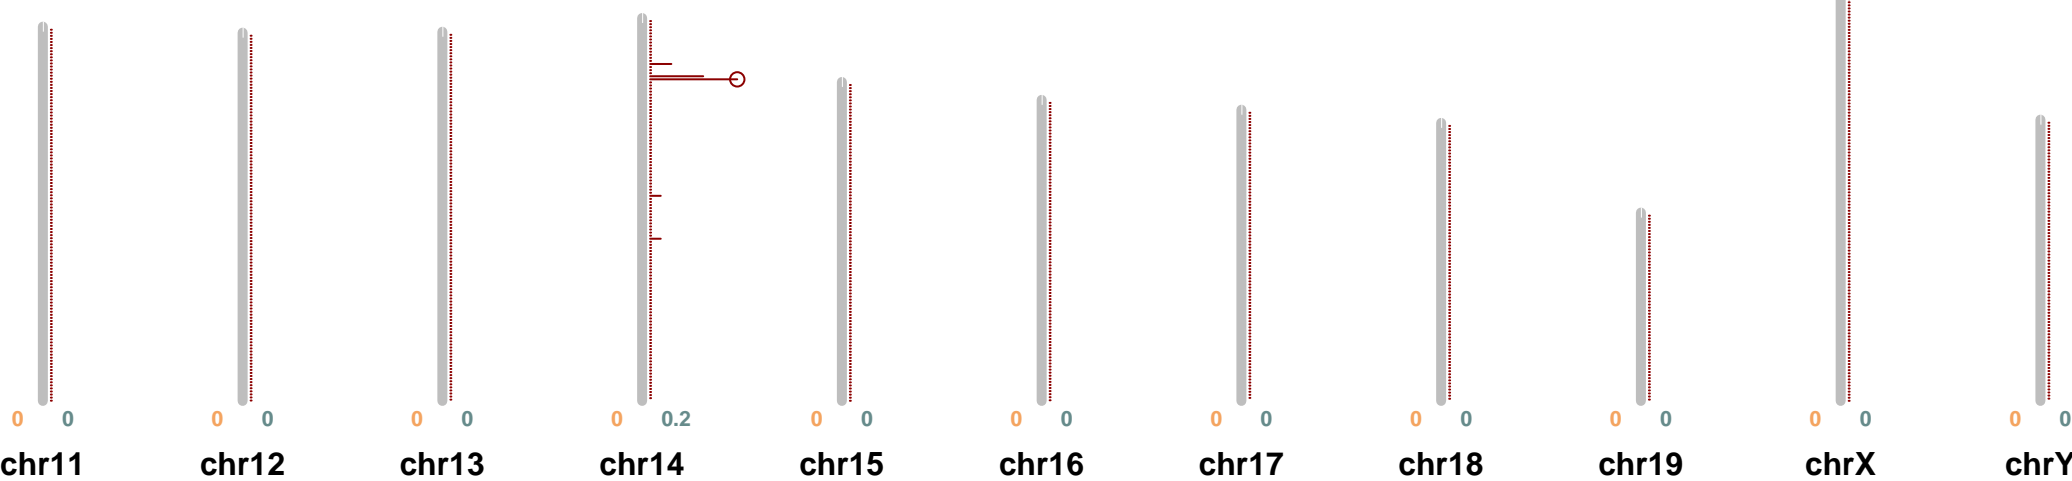

Quality filter=20

Aneuploid chromosomes 0

Normalized counts / Mb = 0.01 Scale = 0.19

chr3 p=0.034 (0.64 adjusted)

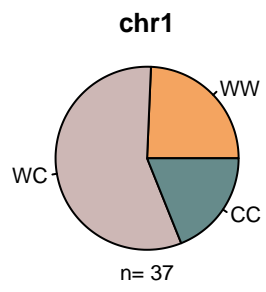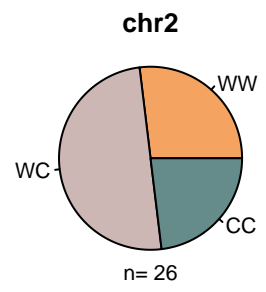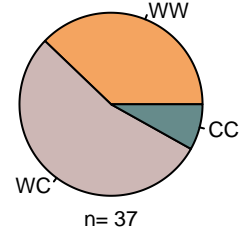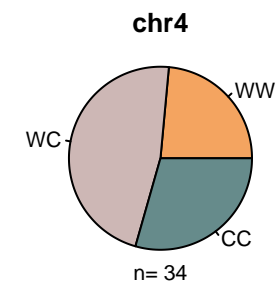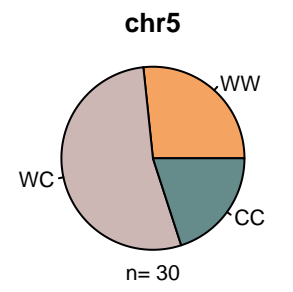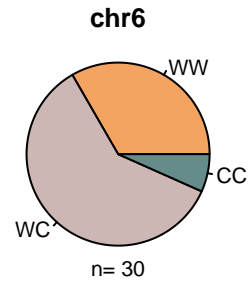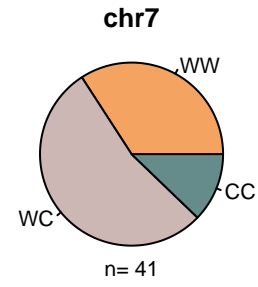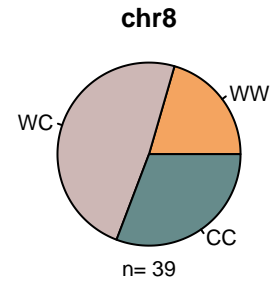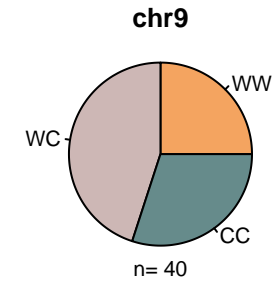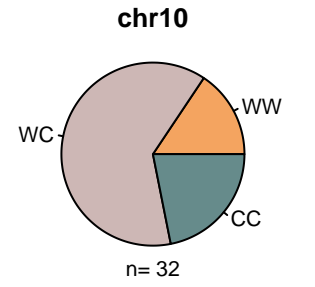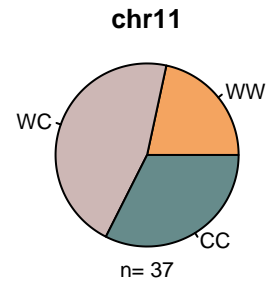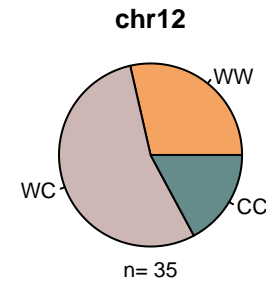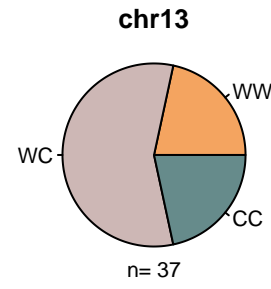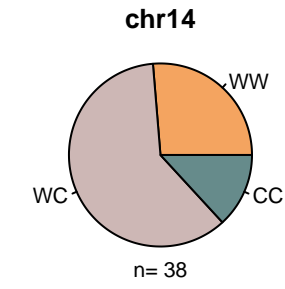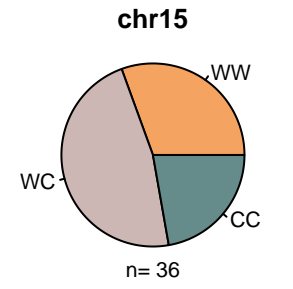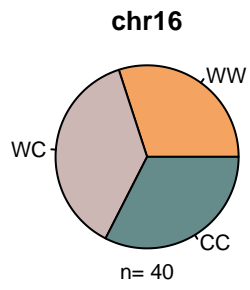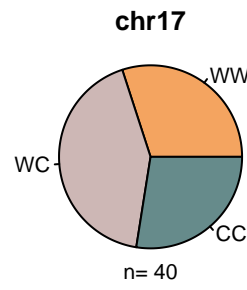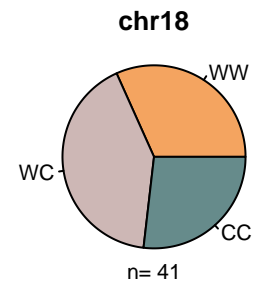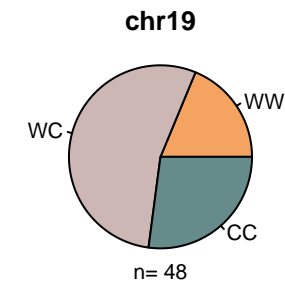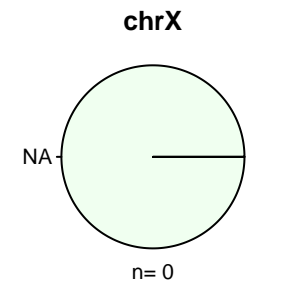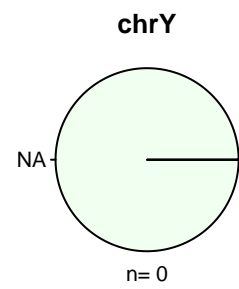

chr1

chr2

chr3

chr4

chr5

chr6

chr7

chr8

chr9

chr10

chr11

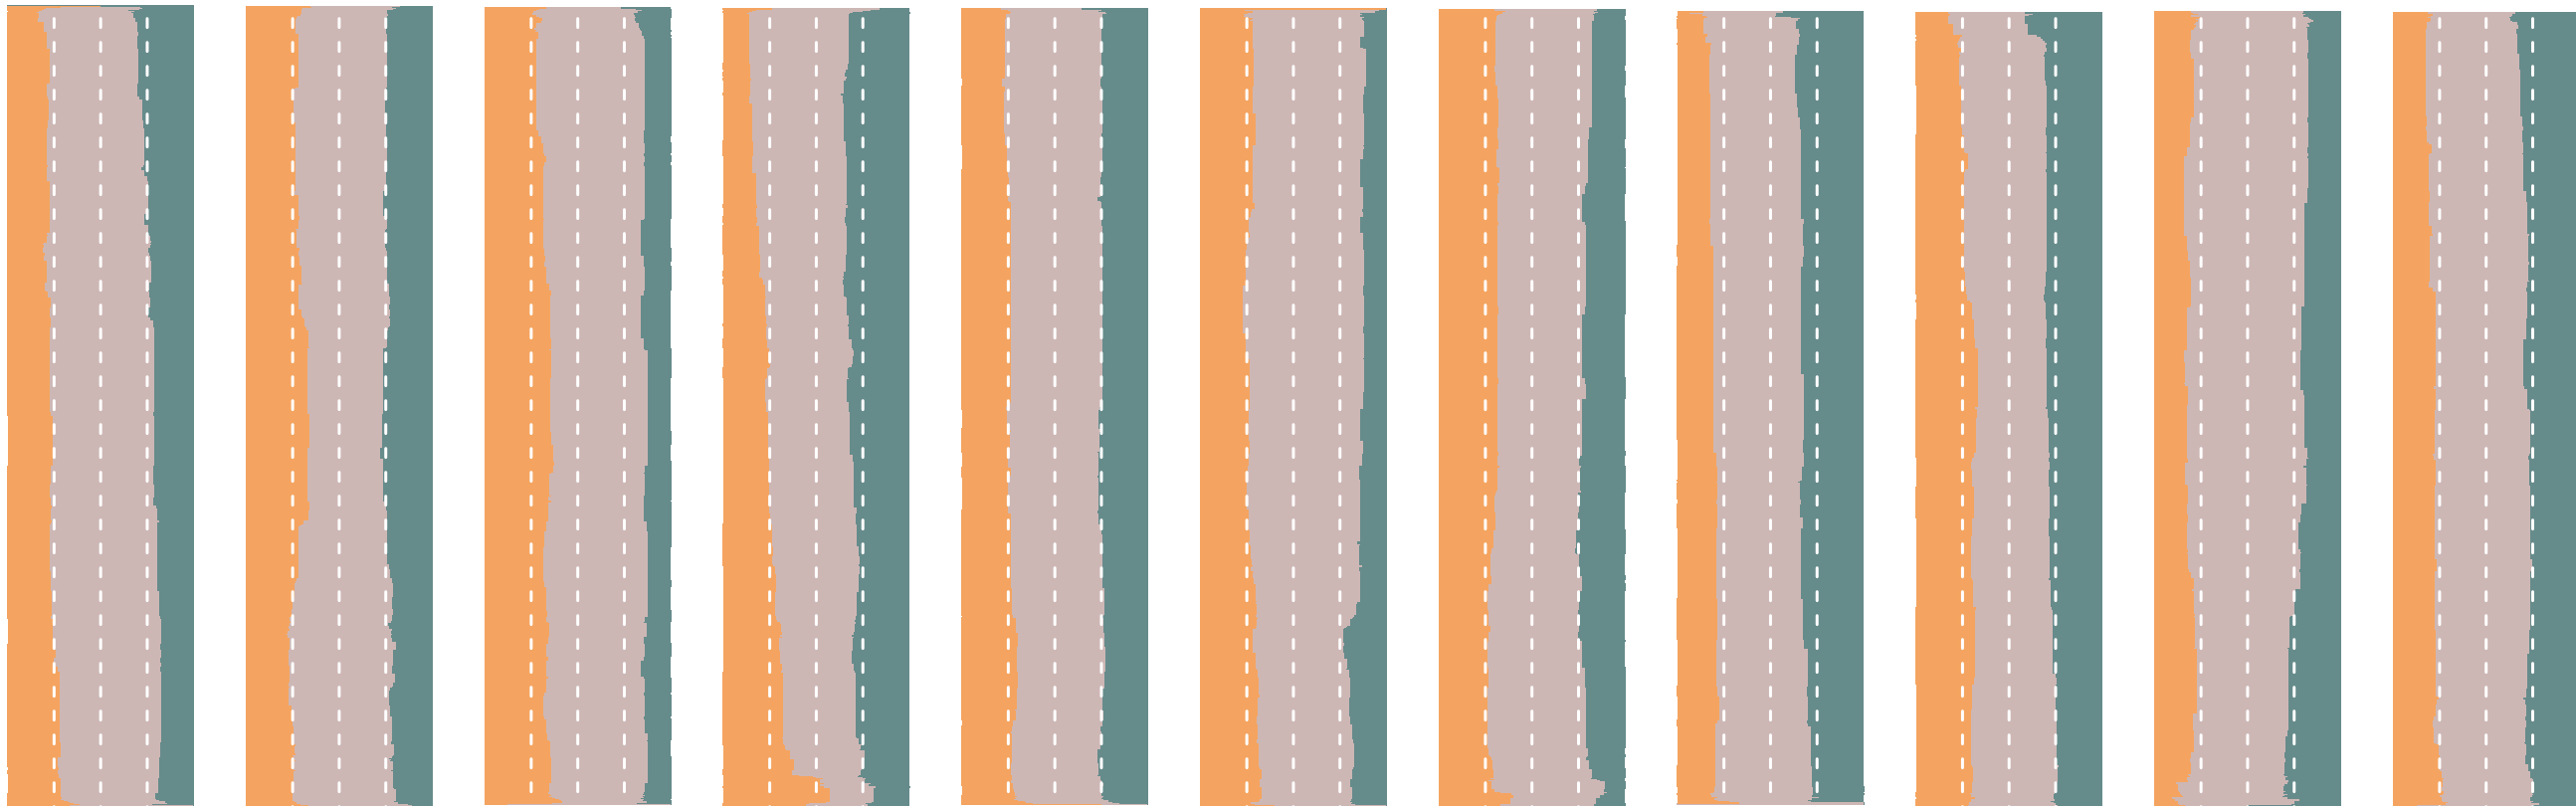

chr12

chr13

chr14

chr15

chr16

chr17

chr18

chr19

chrX

chrY

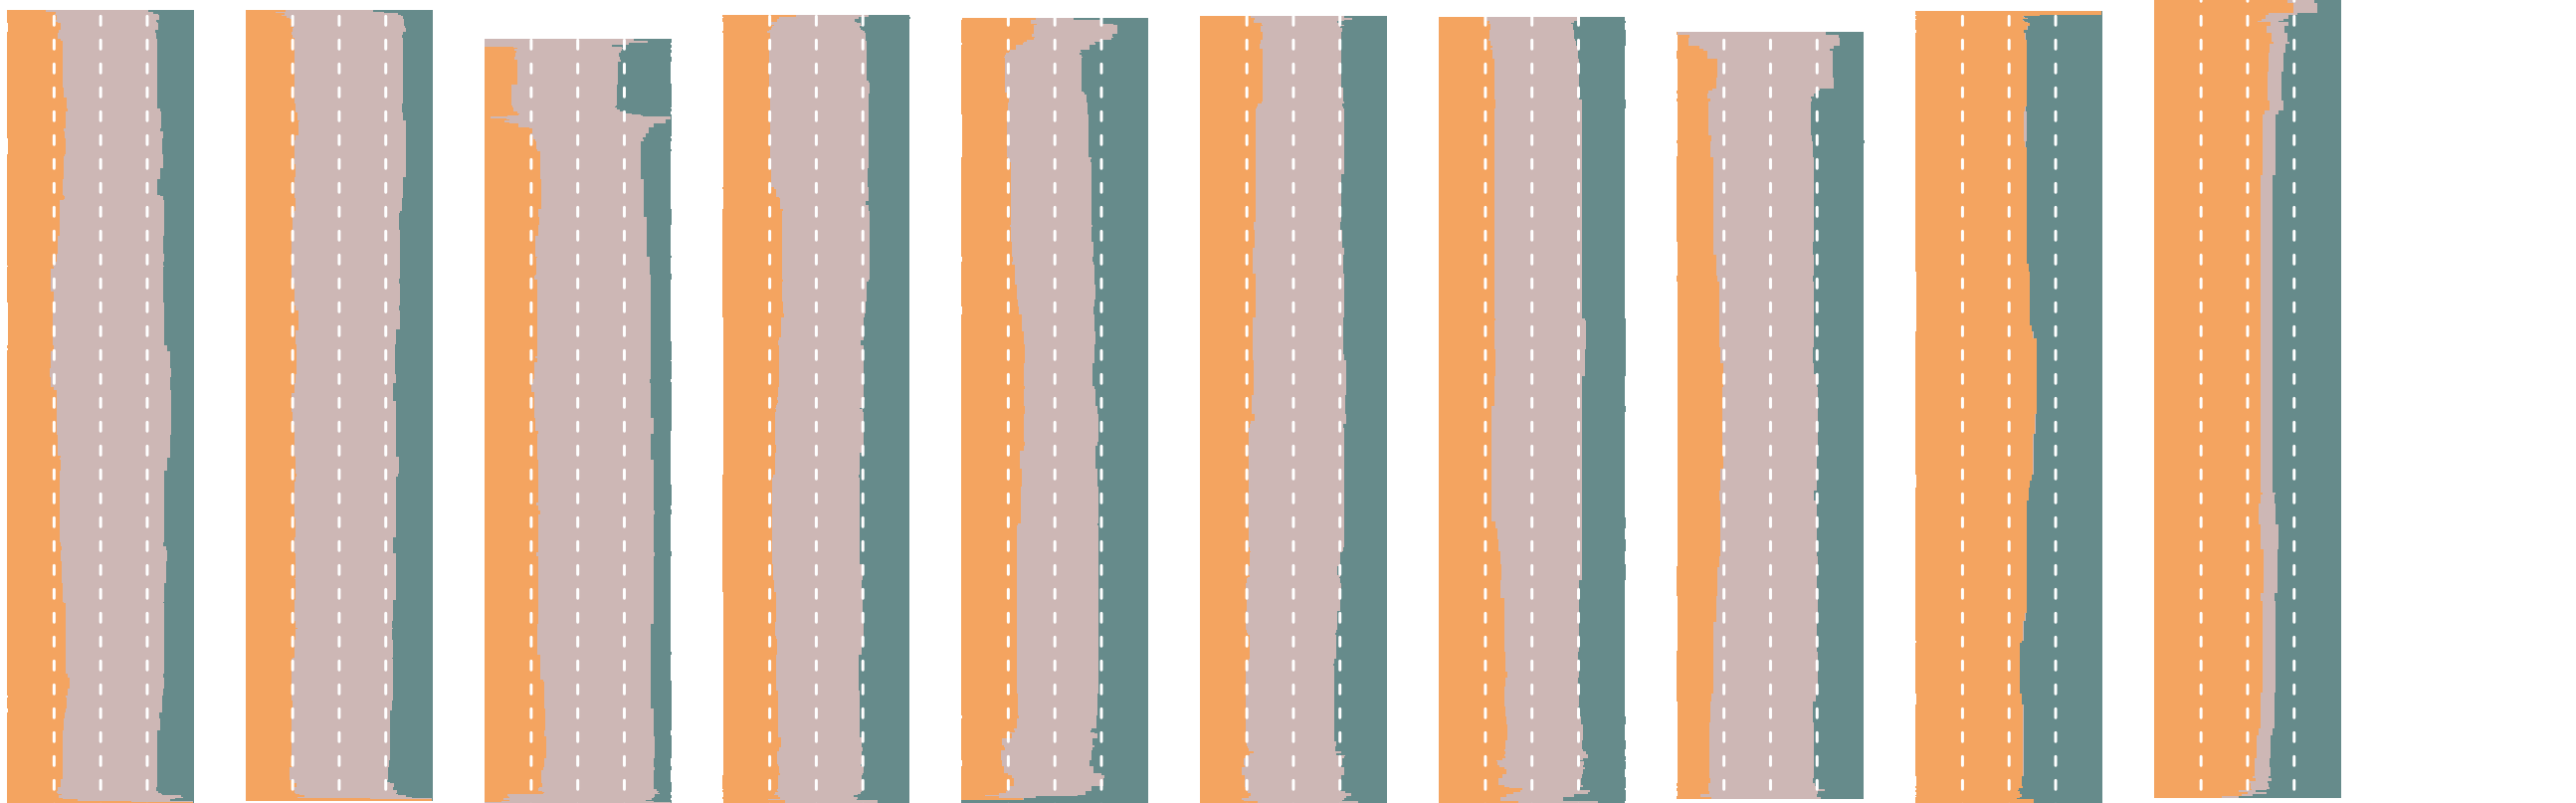

Supplement: gm486-S2.pdf [file gm486-S2.pdf]
