# Supplementary material for: BAIT: Organizing genomes and mapping rearrangements in single cells
Source: PubMed Central journal article supplement (PMC3971352; doi:10.1186/gm486), 2013-09-13
Supplement: gm486-S7.pdf [file gm486-S7.pdf]

Fragment= chrUn\_GL456239 Organism= Mus\_musculus

Peak agreement= 91.07 %

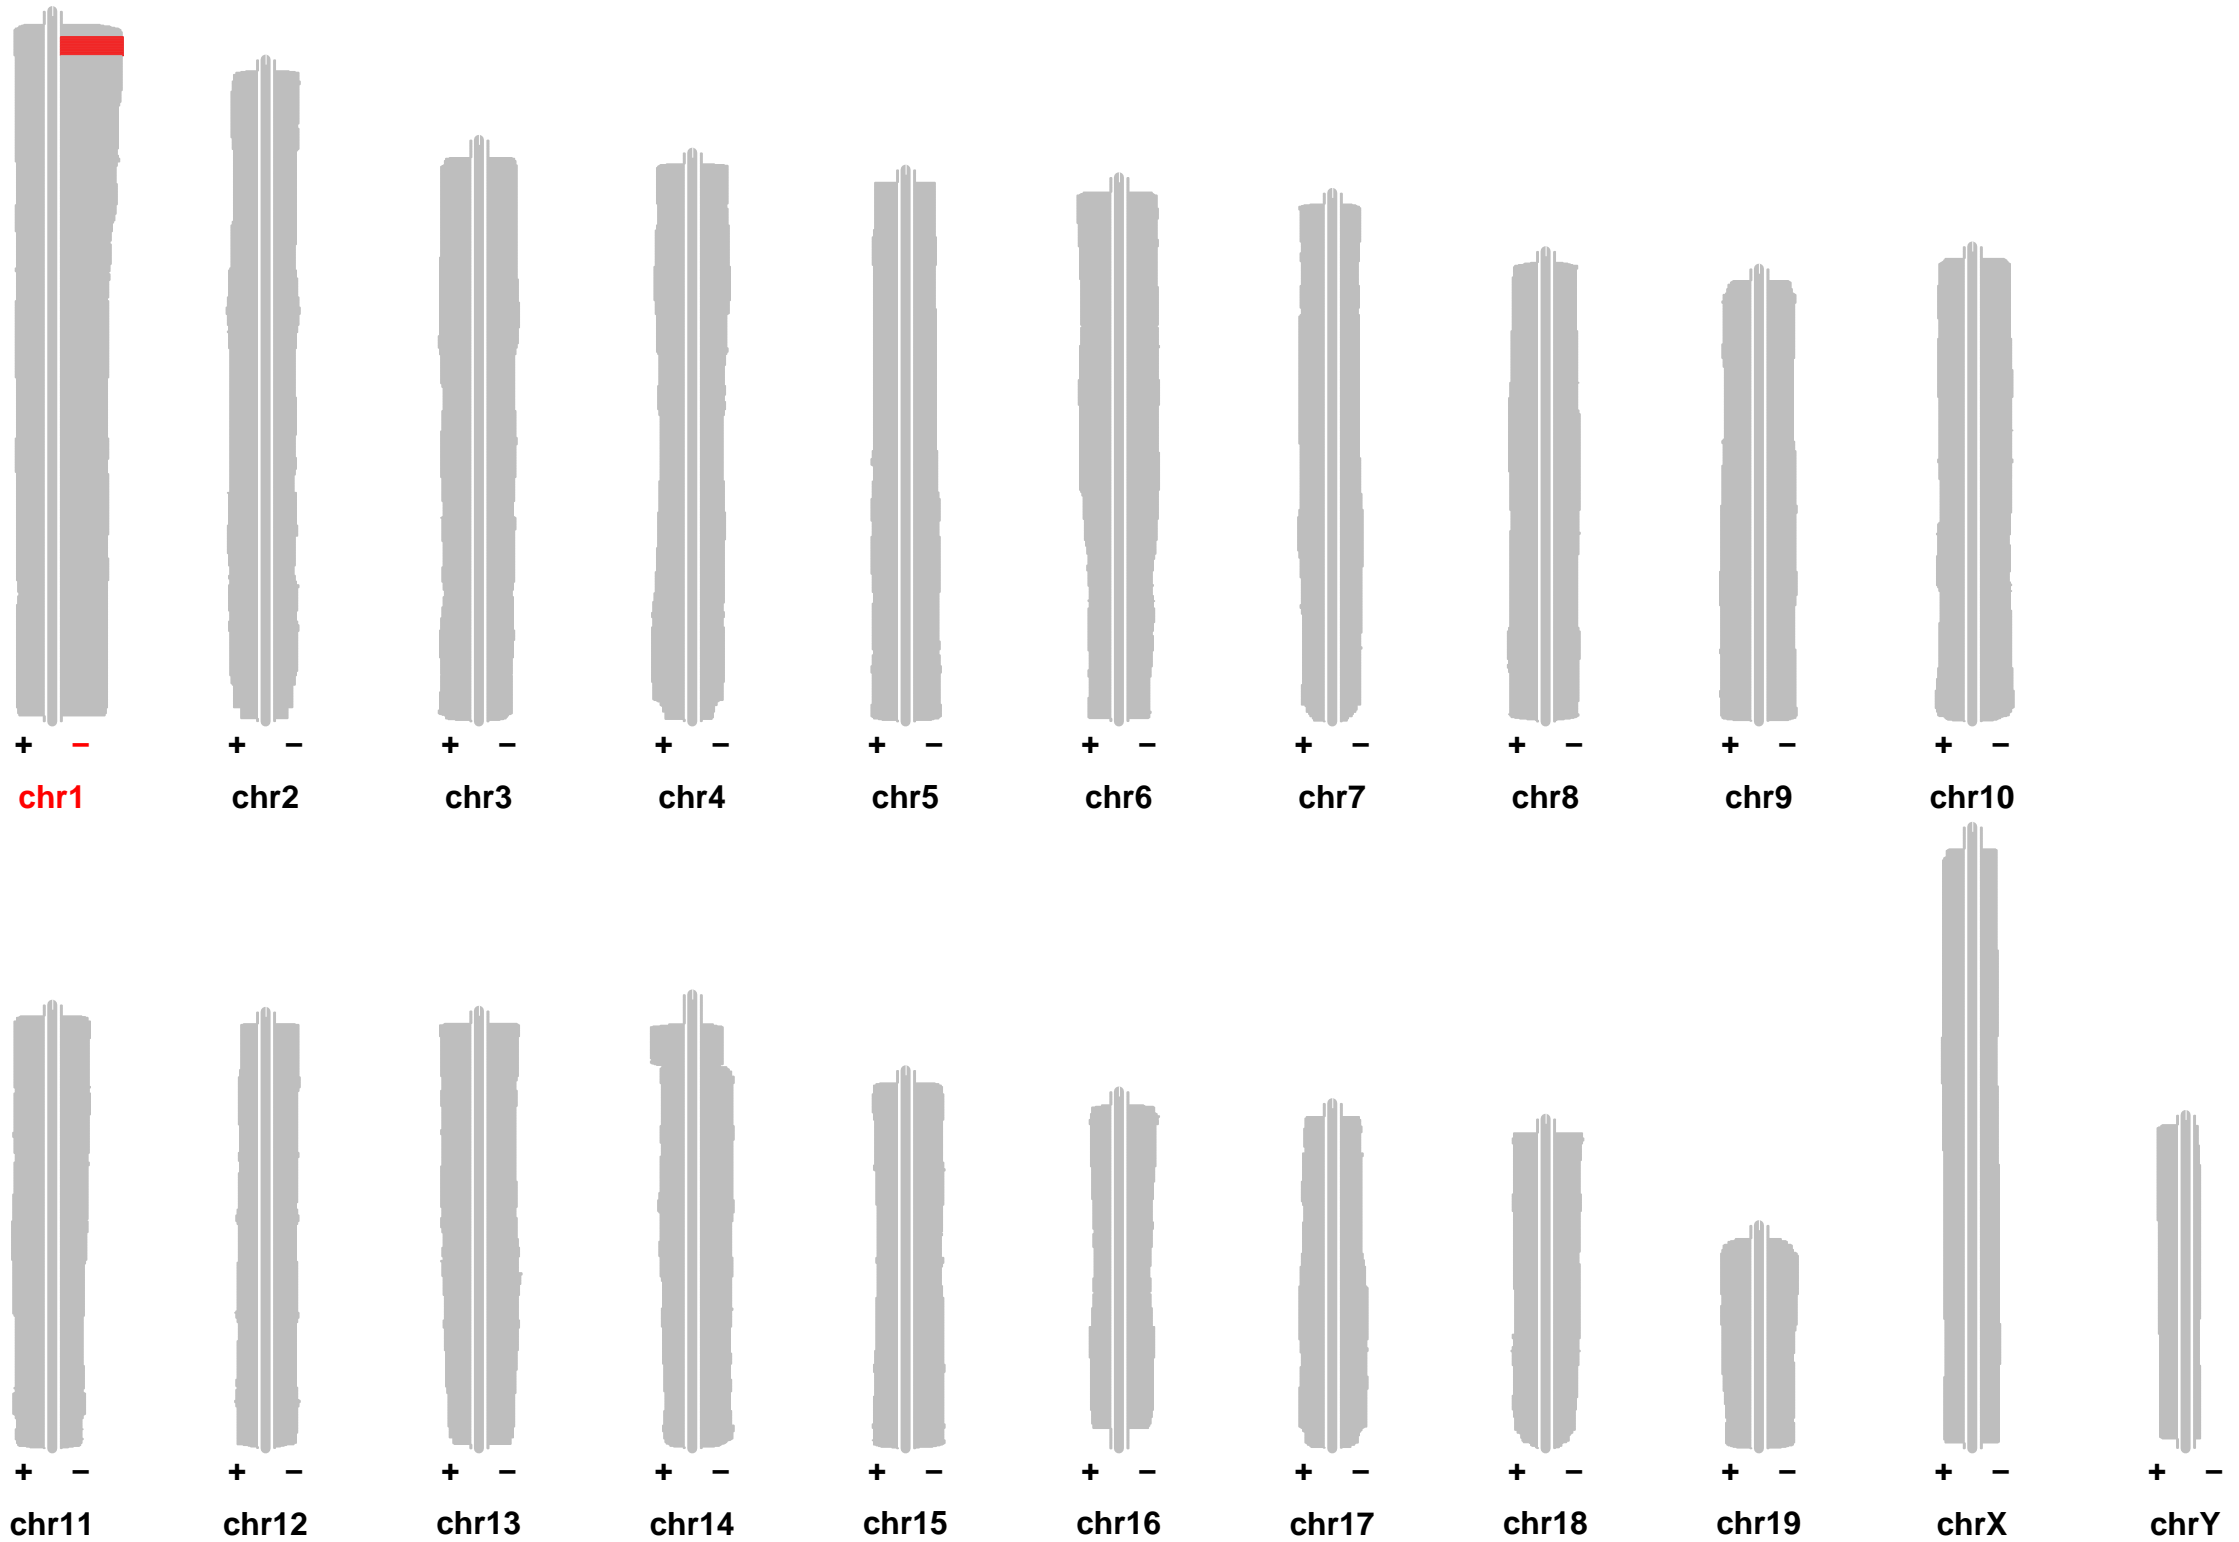

Quality filter=20

Fragment= chrUn\_GL456359 Organism= Mus\_musculus

Peak agreement= 86.79 %

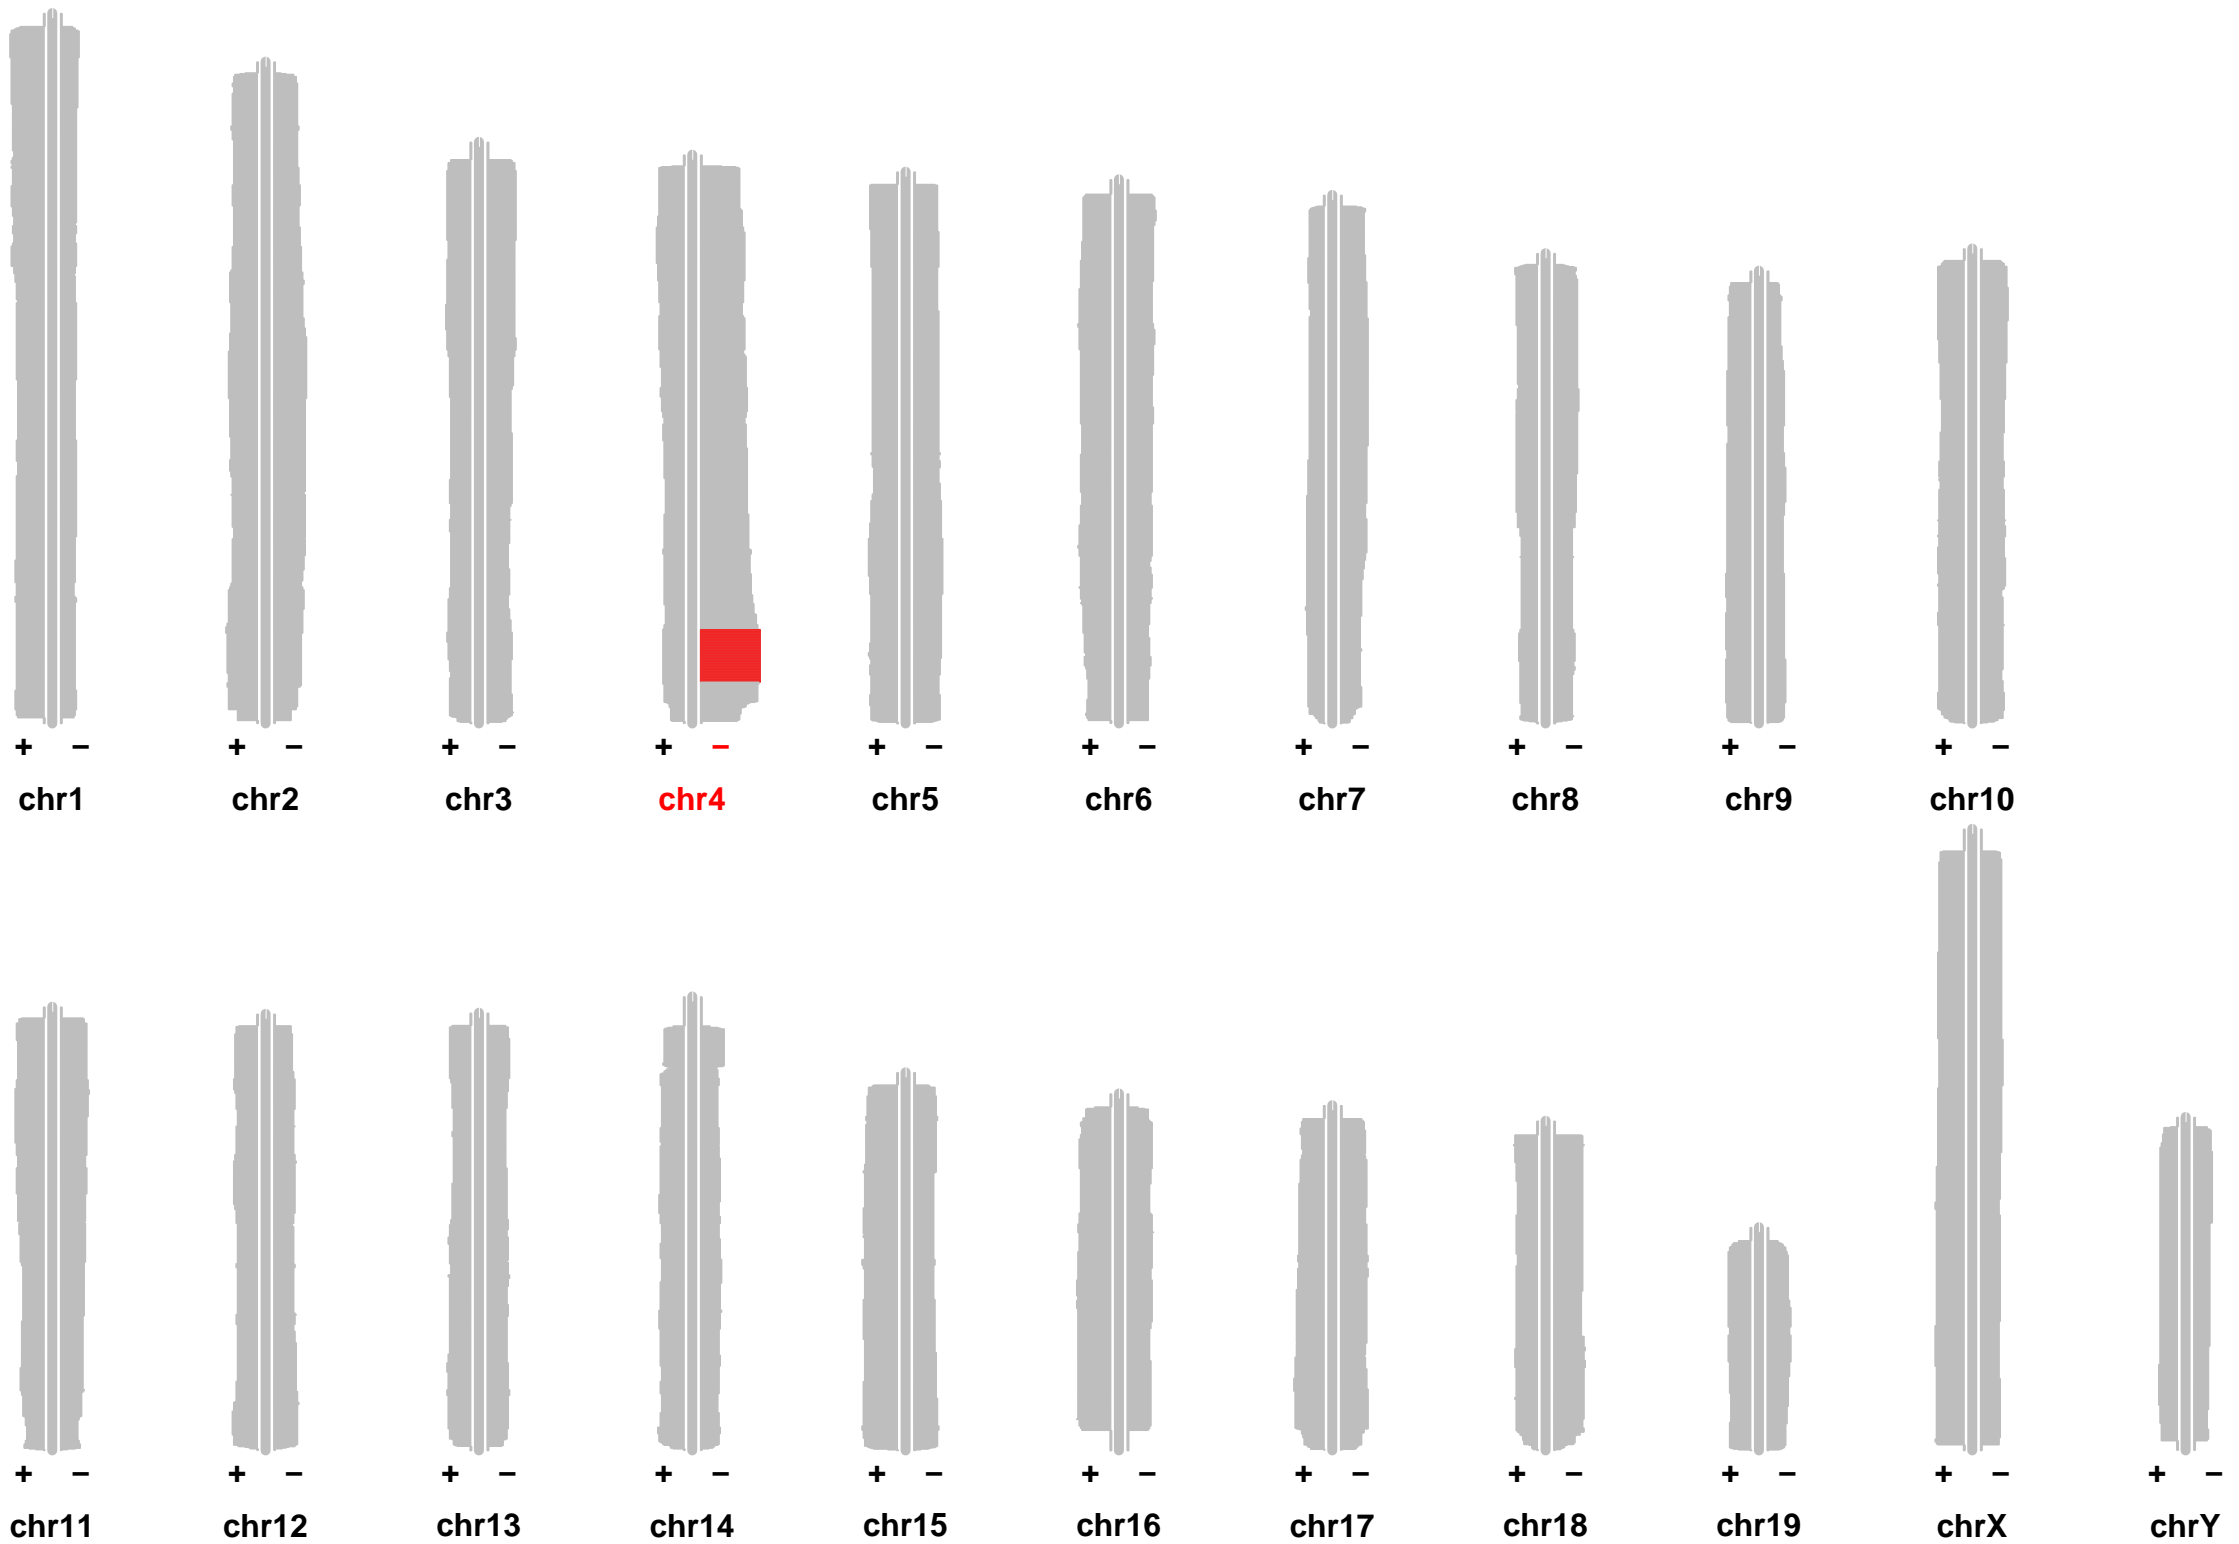

Quality filter=20

Fragment= chrUn\_GL456360 Organism= Mus\_musculus

Peak agreement= 89.09 %

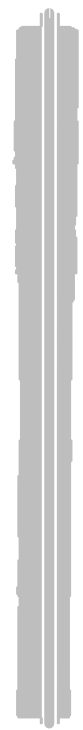

+ -  
chr1

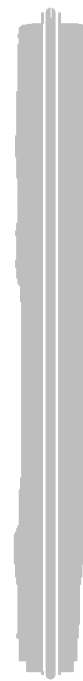

+ -  
chr2

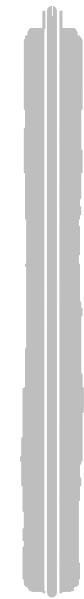

+ -  
chr3

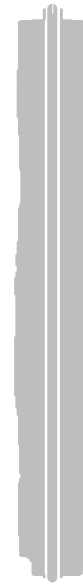

+ -  
chr4

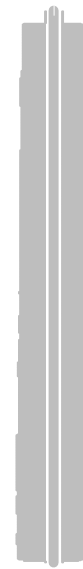

+ -  
chr5

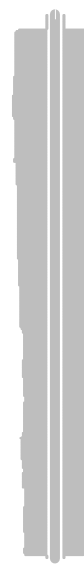

+ -  
chr6

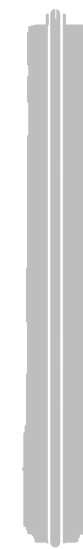

+ -  
chr7

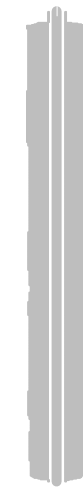

+ -  
chr8

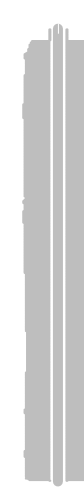

+ -  
chr9

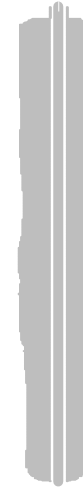

+ -  
chr10

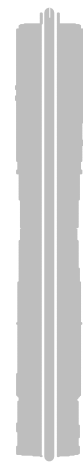

+ -  
chr11

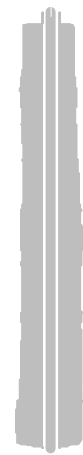

+ -  
chr12

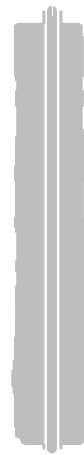

+ -  
chr13

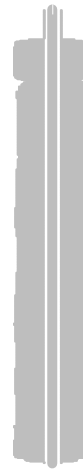

+ -  
chr14

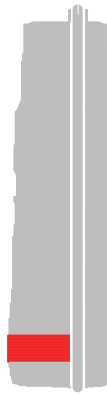

+ -  
chr15

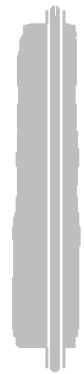

+ -  
chr16

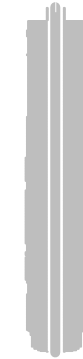

+ -  
chr17

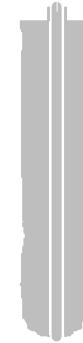

+ -  
chr18

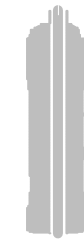

+ -  
chr19

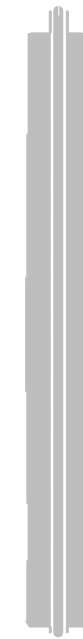

+ -  
chrX

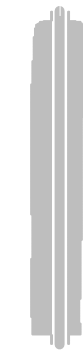

+ -  
chrY

Quality filter=20

Fragment= chrUn\_GL456366 Organism= Mus\_musculus

Peak agreement= 82.14 %

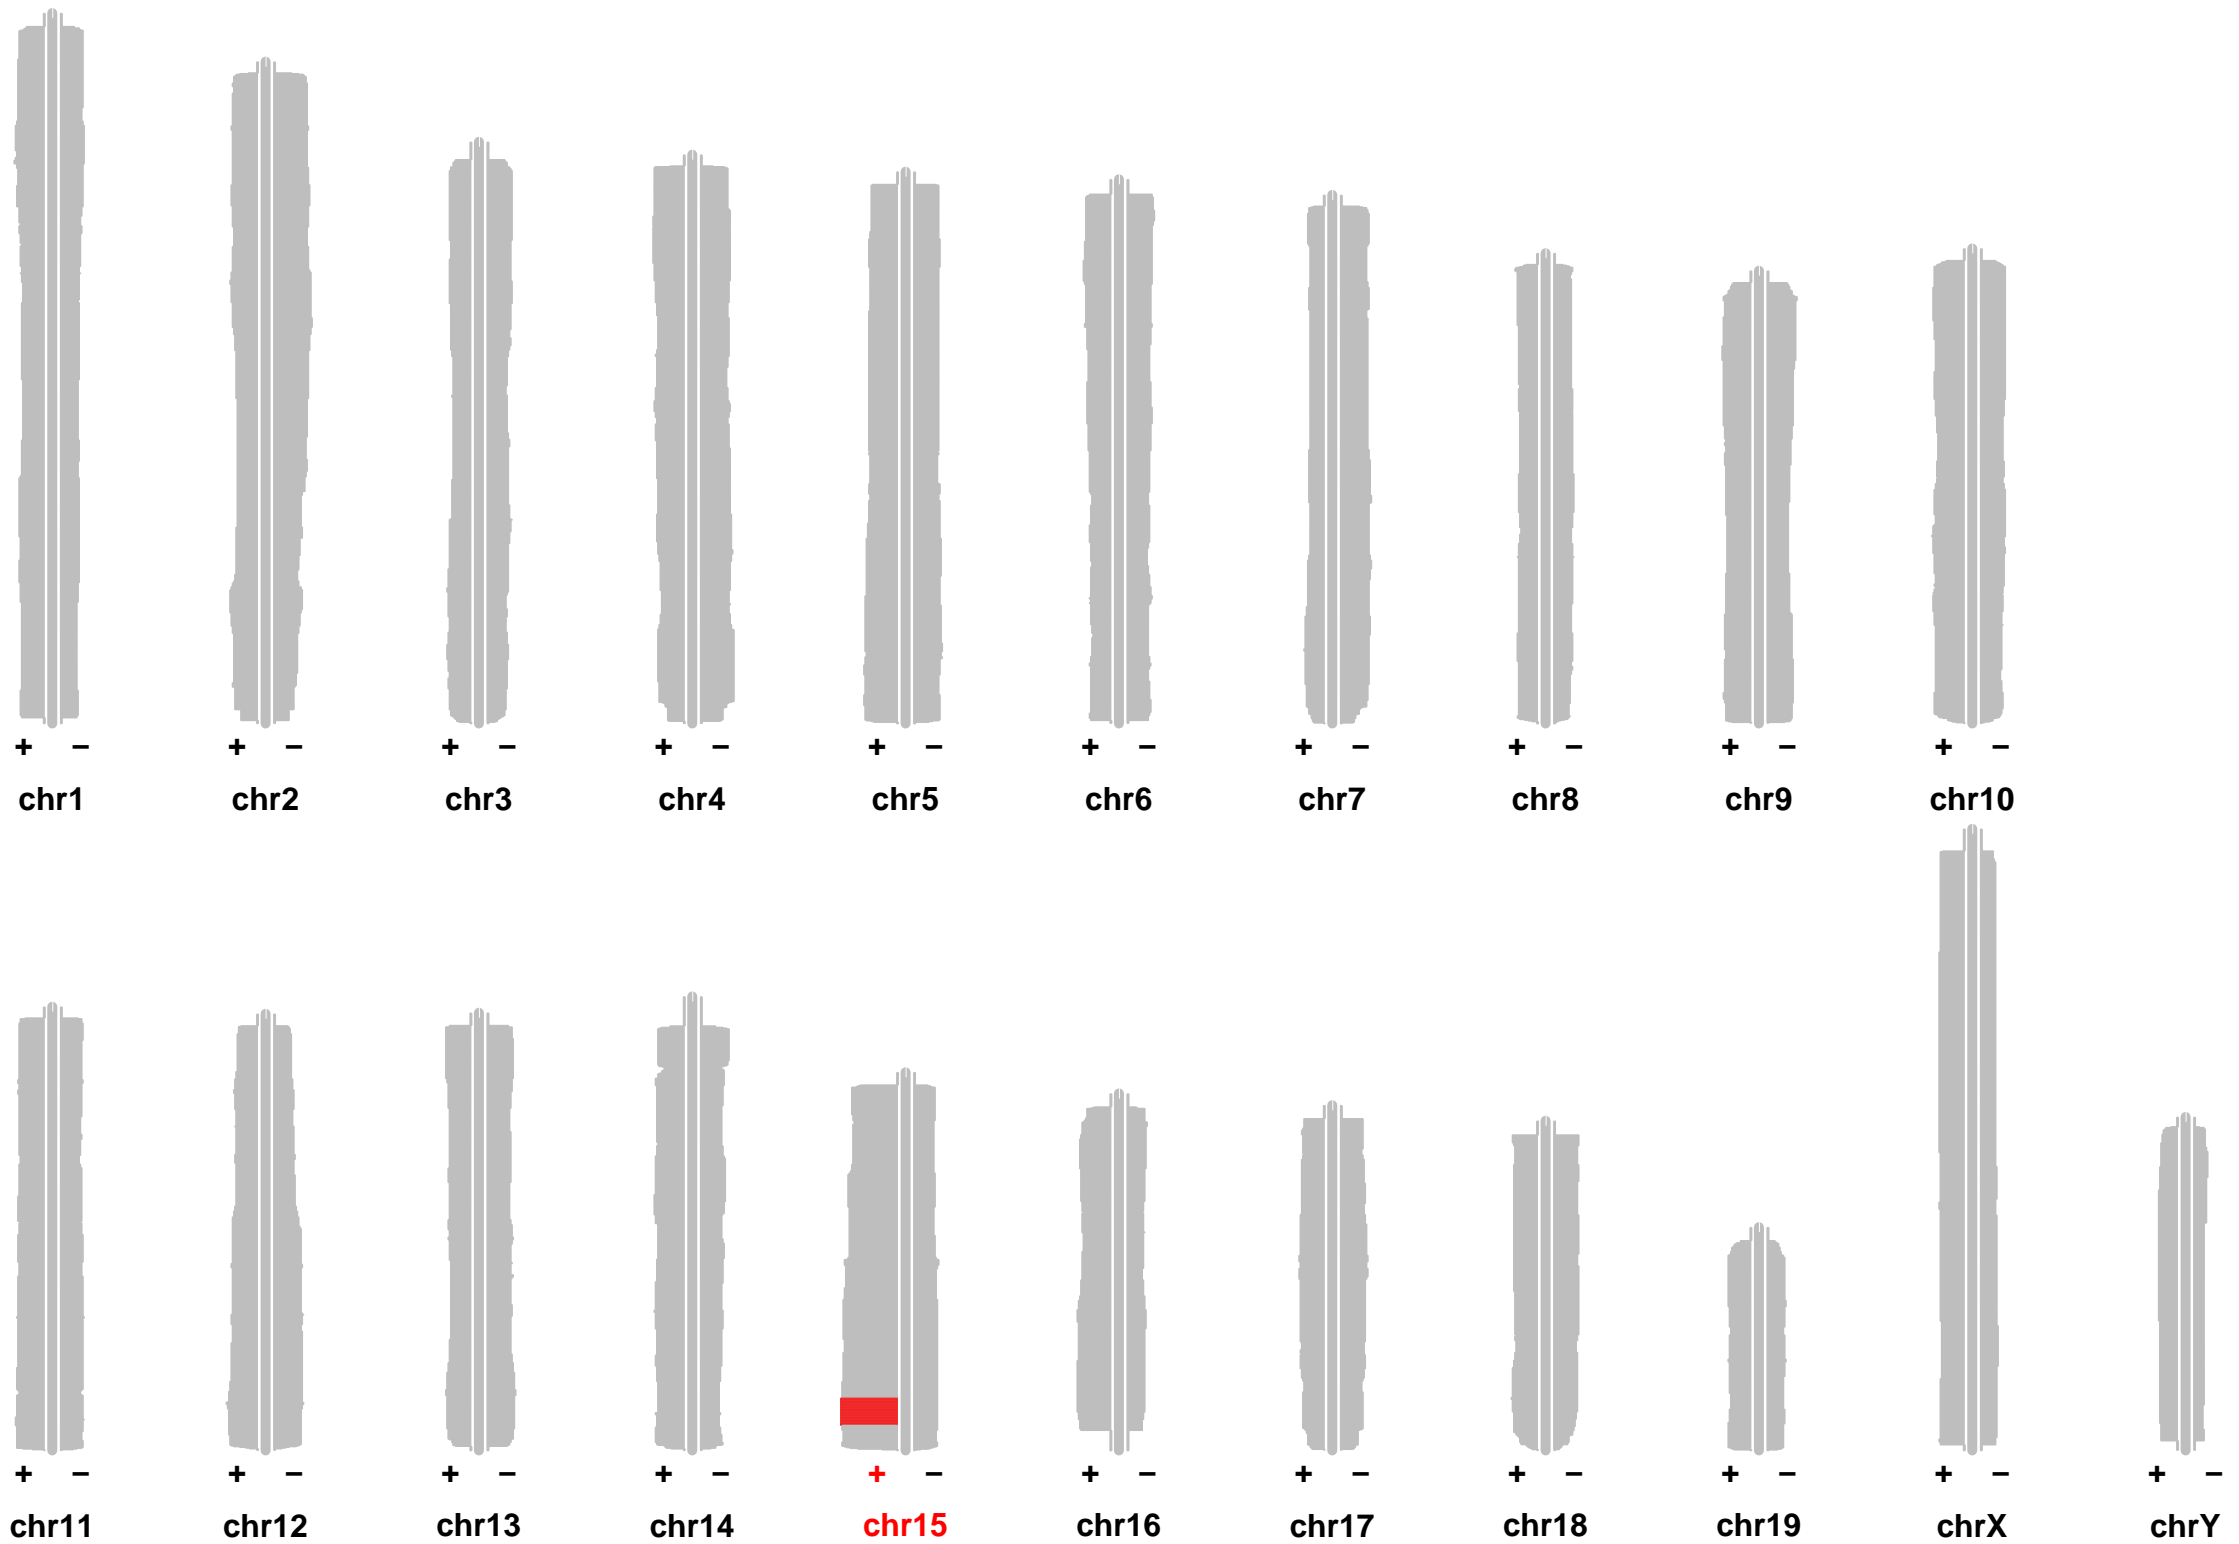

Quality filter=20

Fragment= chrUn\_GL456367 Organism= Mus\_musculus

Peak agreement= 95 %

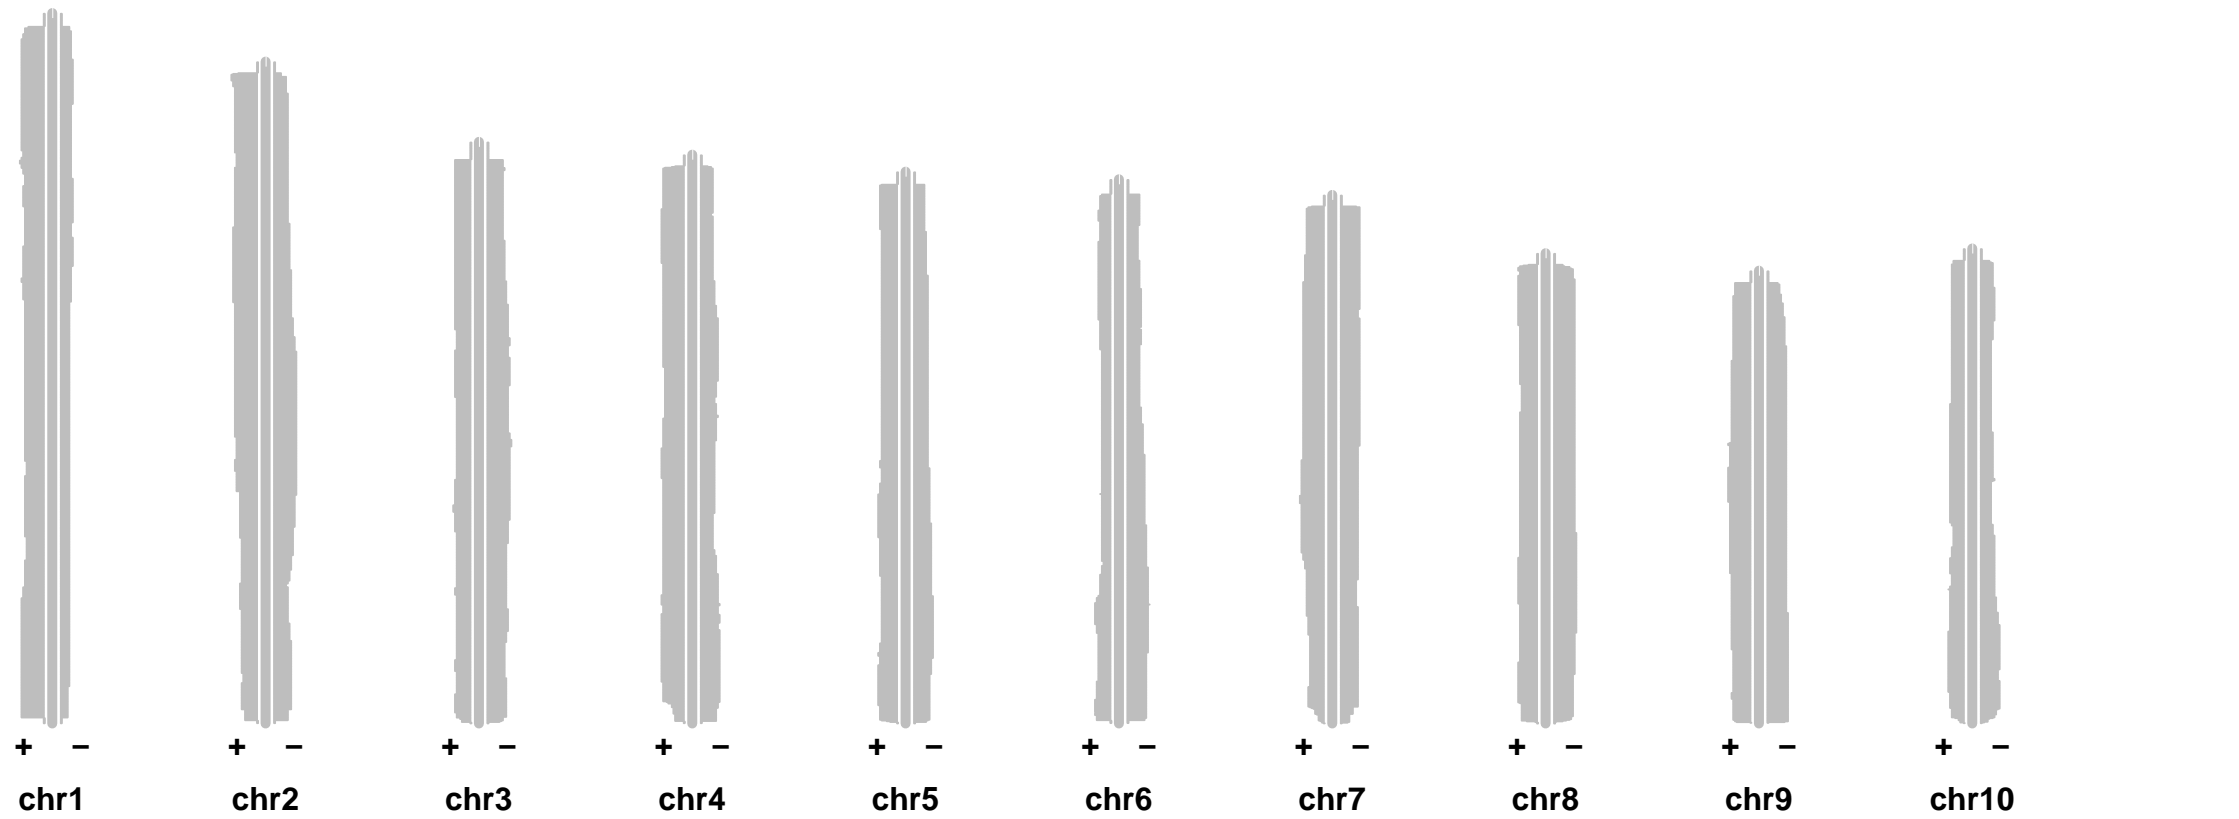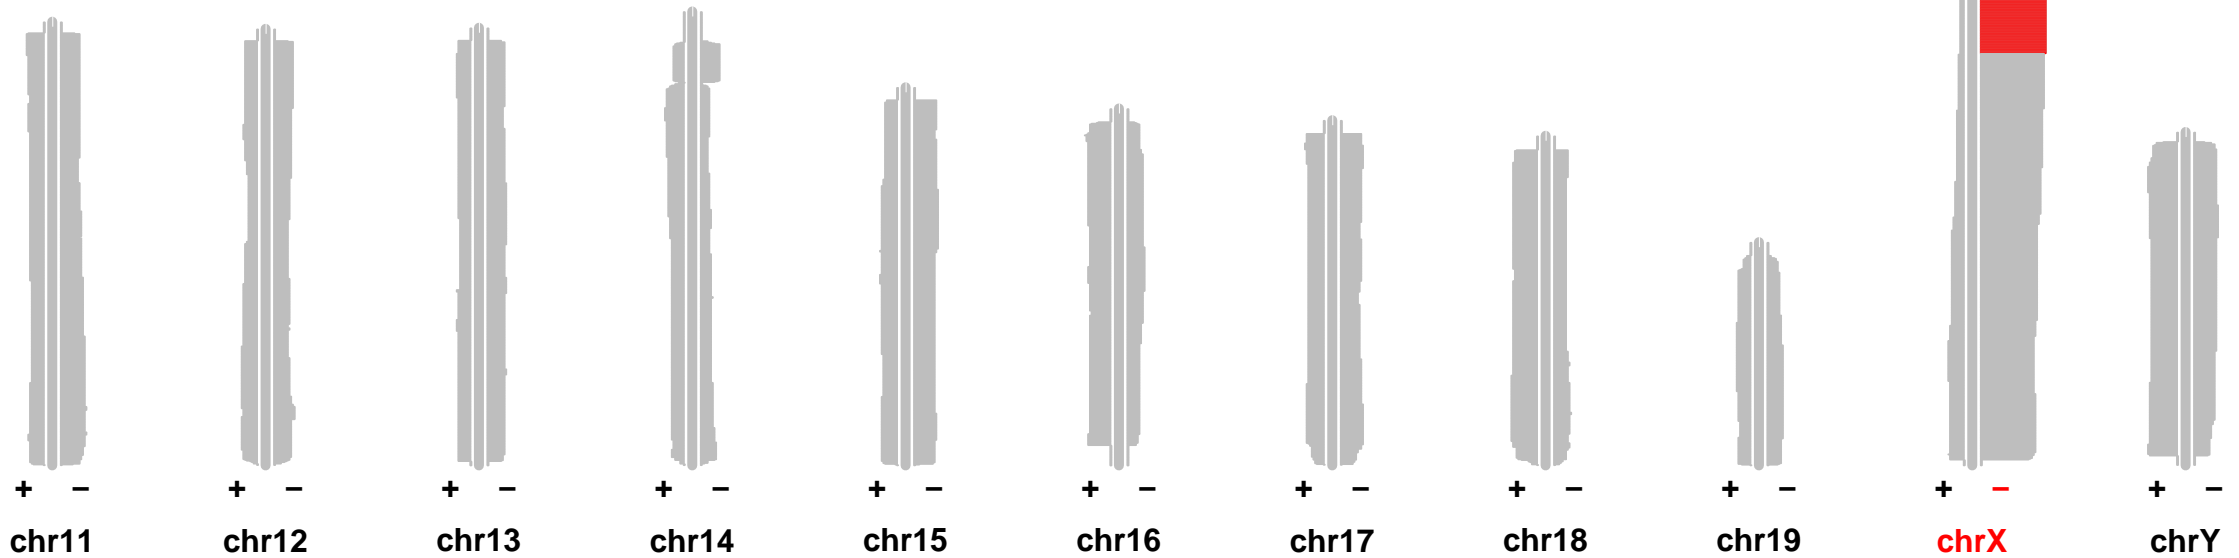

Quality filter=20

Fragment= chrUn\_GL456368 Organism= Mus\_musculus

Peak agreement= 84.09 %

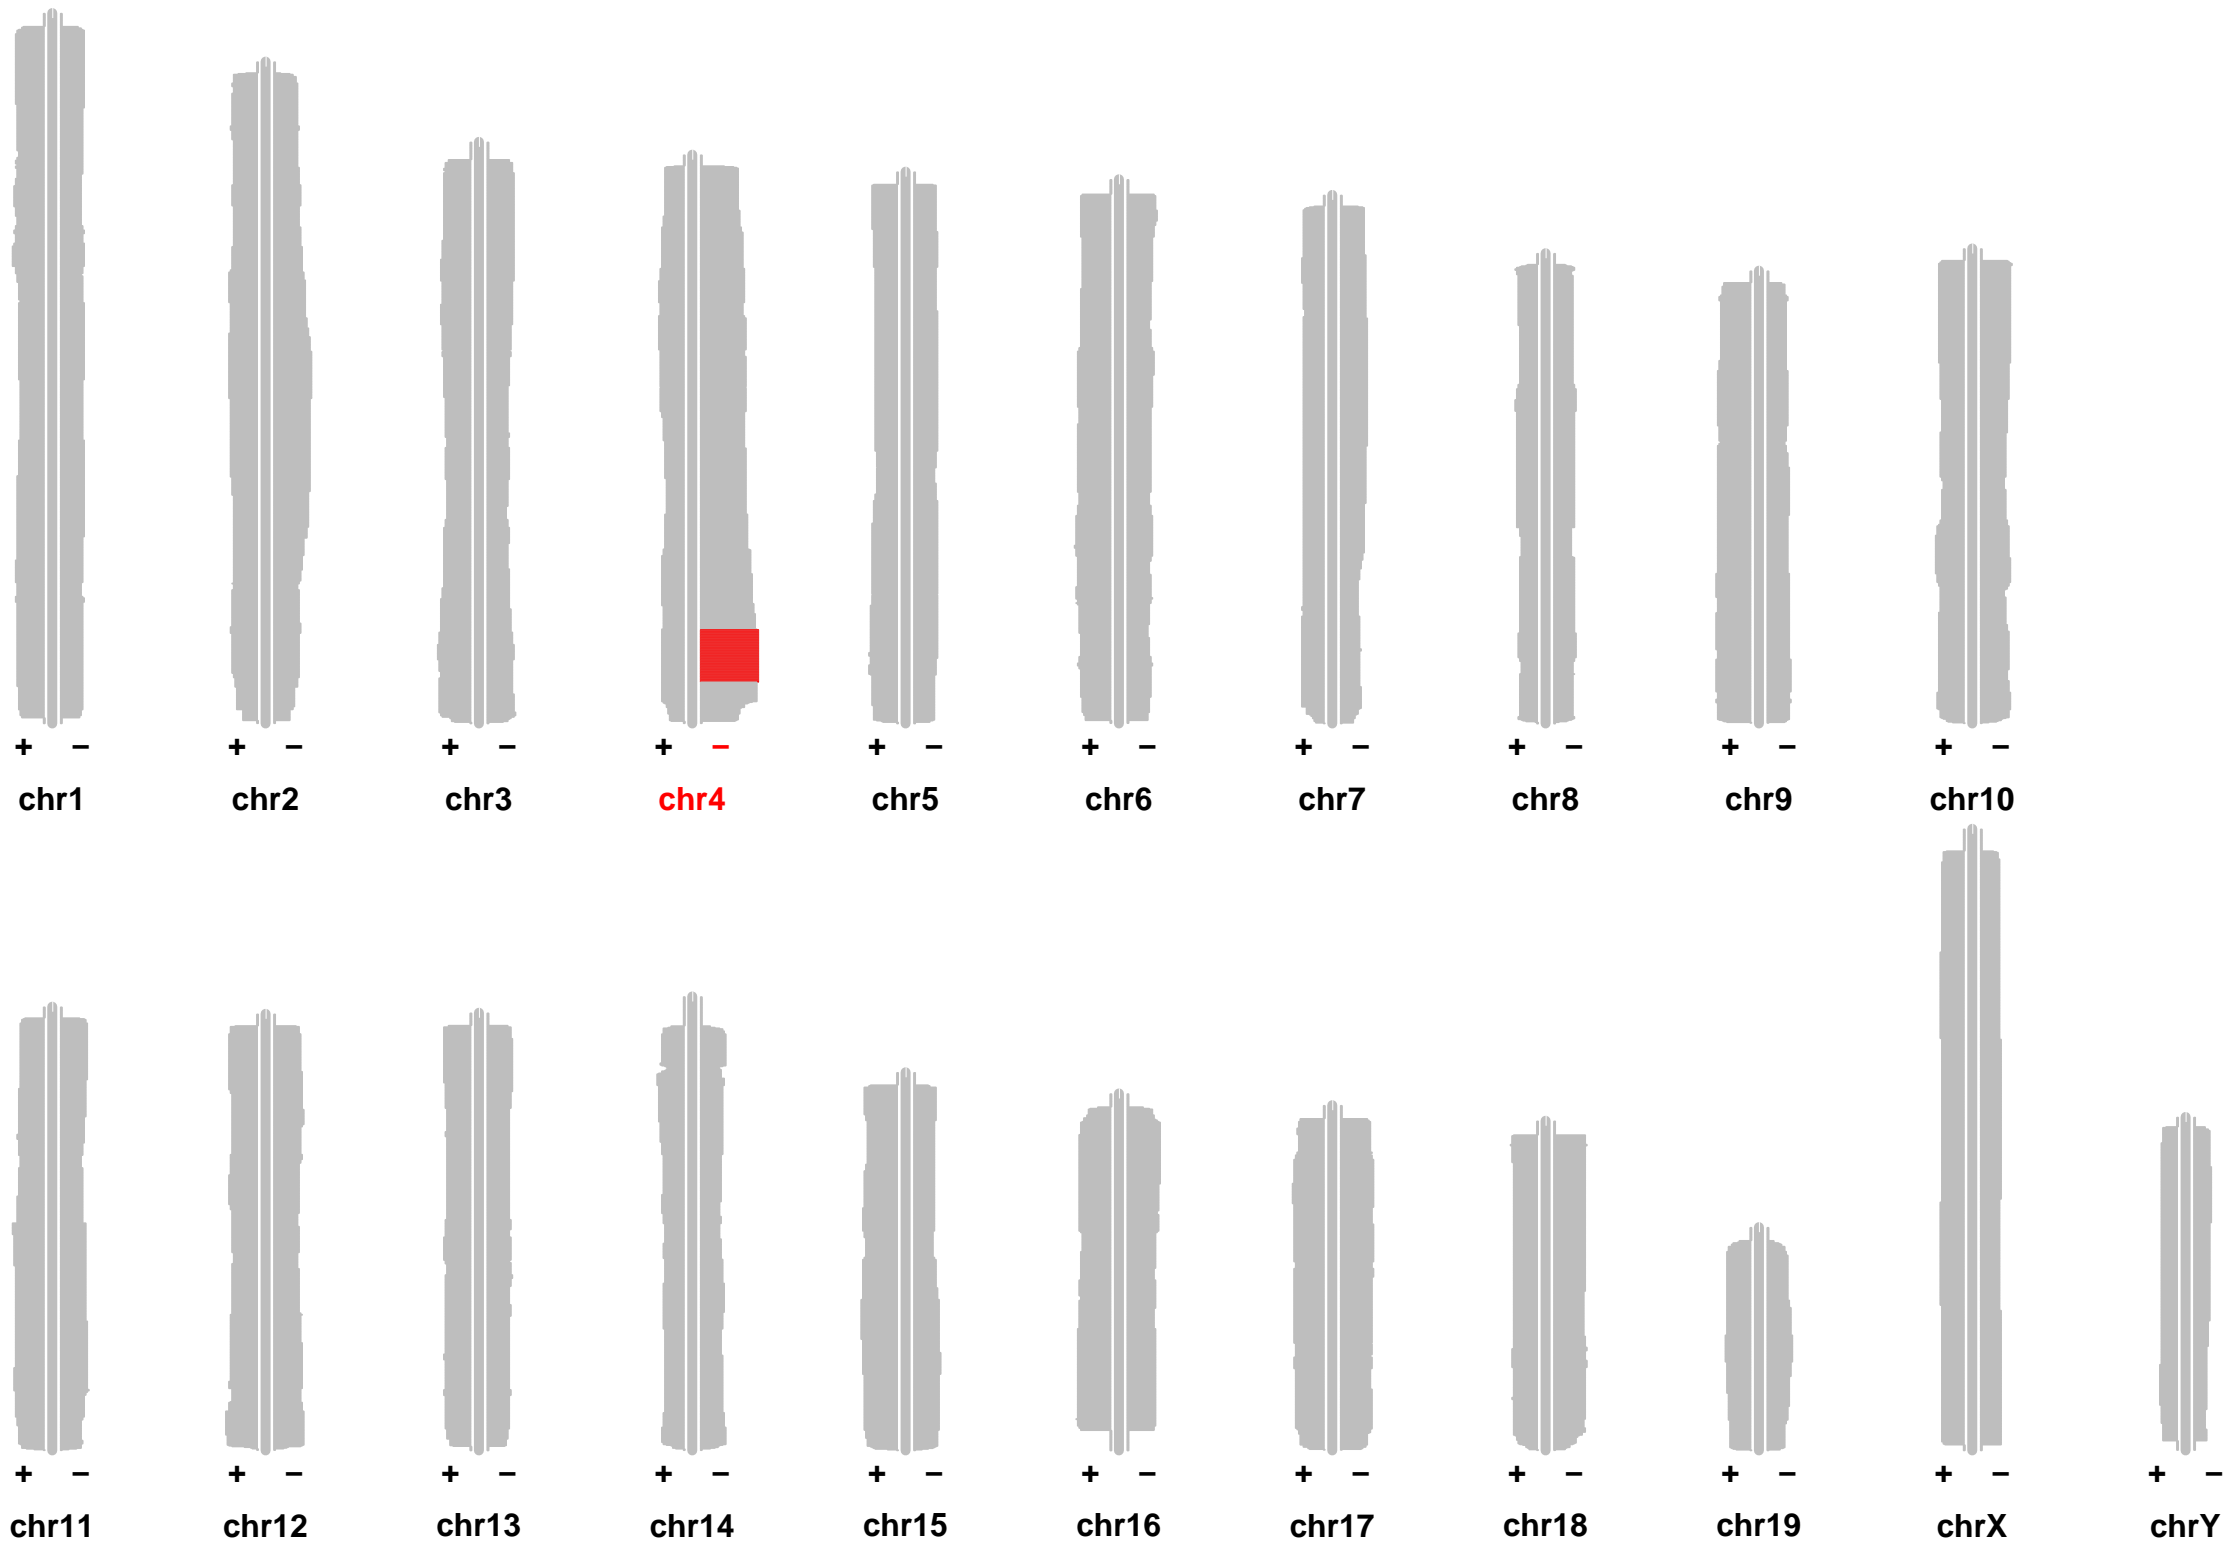

Quality filter=20

Fragment= chrUn\_GL456370 Organism= Mus\_musculus

Peak agreement= 52.38 %

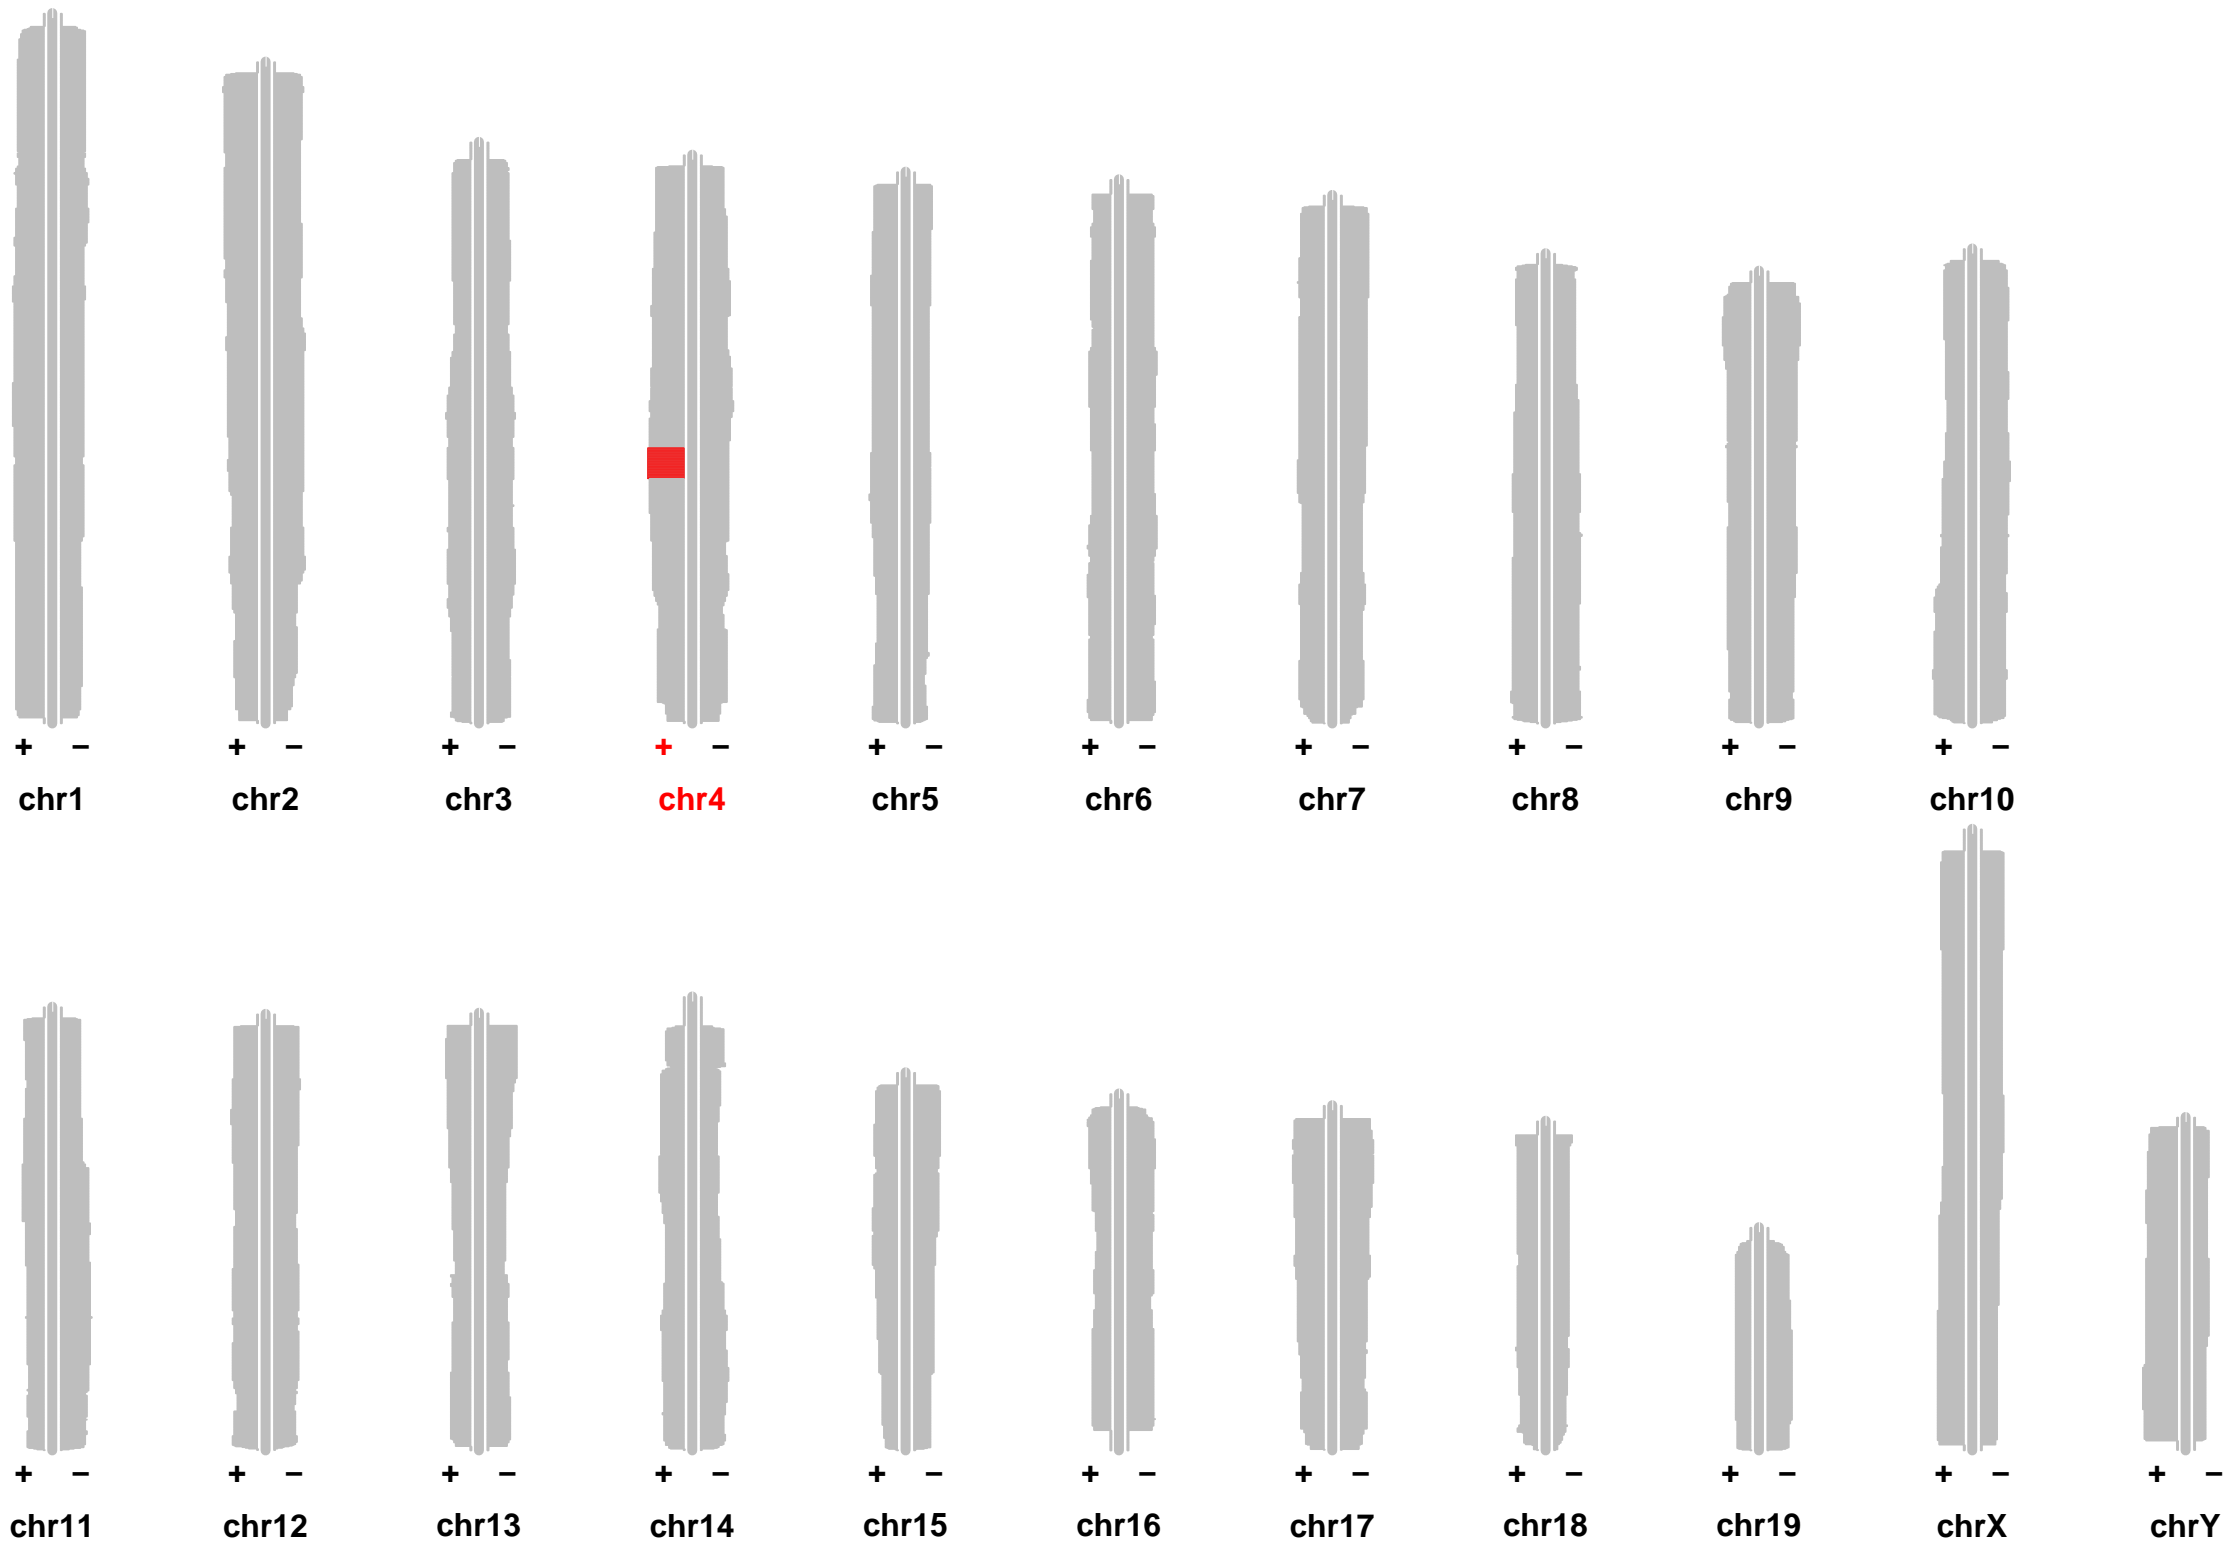

Quality filter=20

Fragment= chrUn\_GL456372 Organism= Mus\_musculus

Peak agreement= 69.81 %

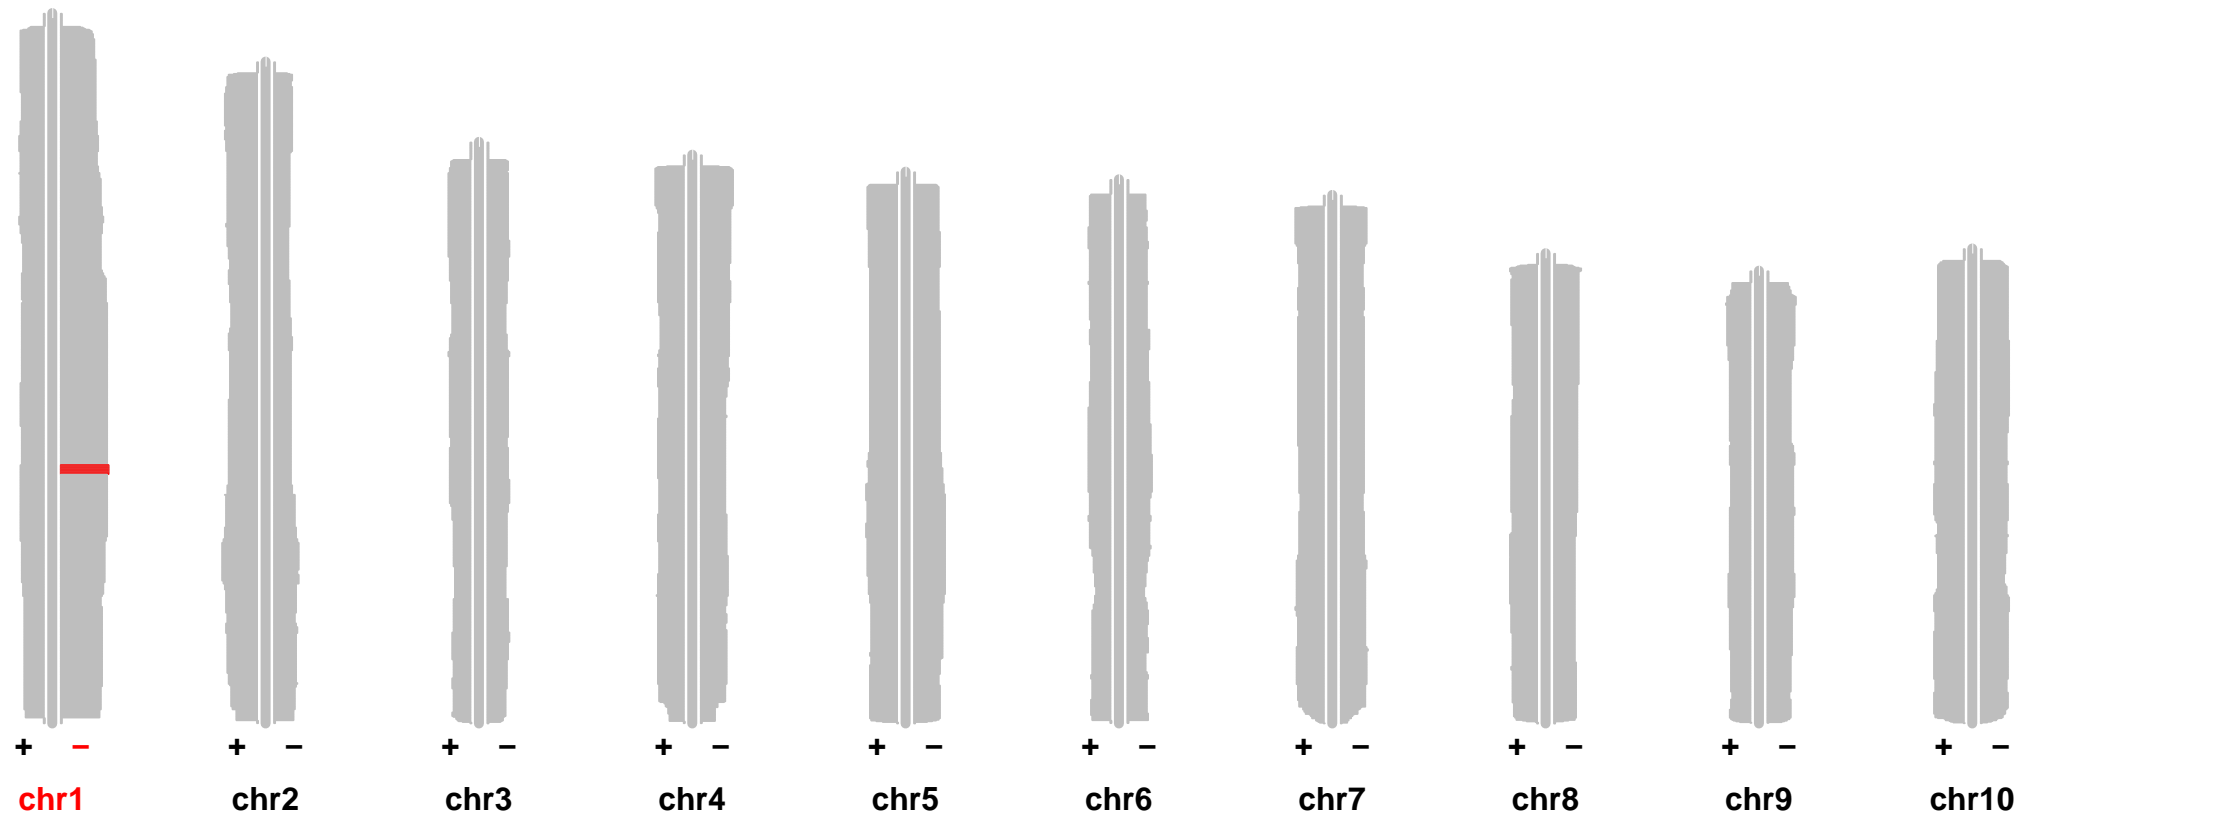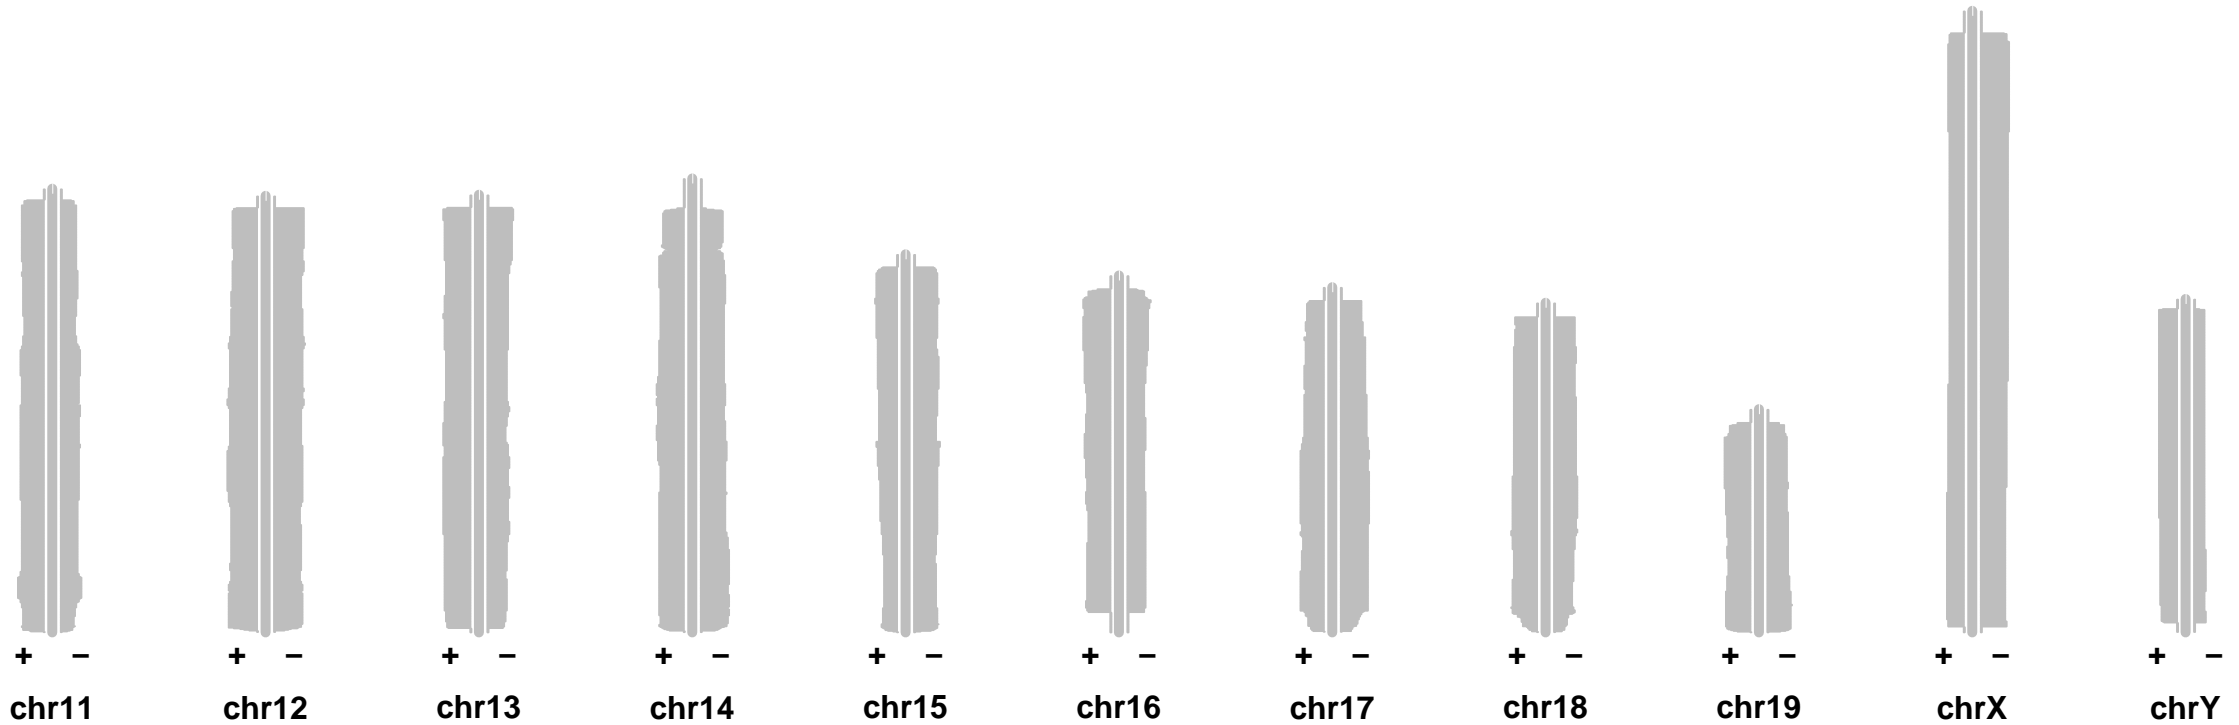

Quality filter=20



Fragment= chrUn\_GL456378 Organism= Mus\_musculus

Peak agreement= 63.16 %

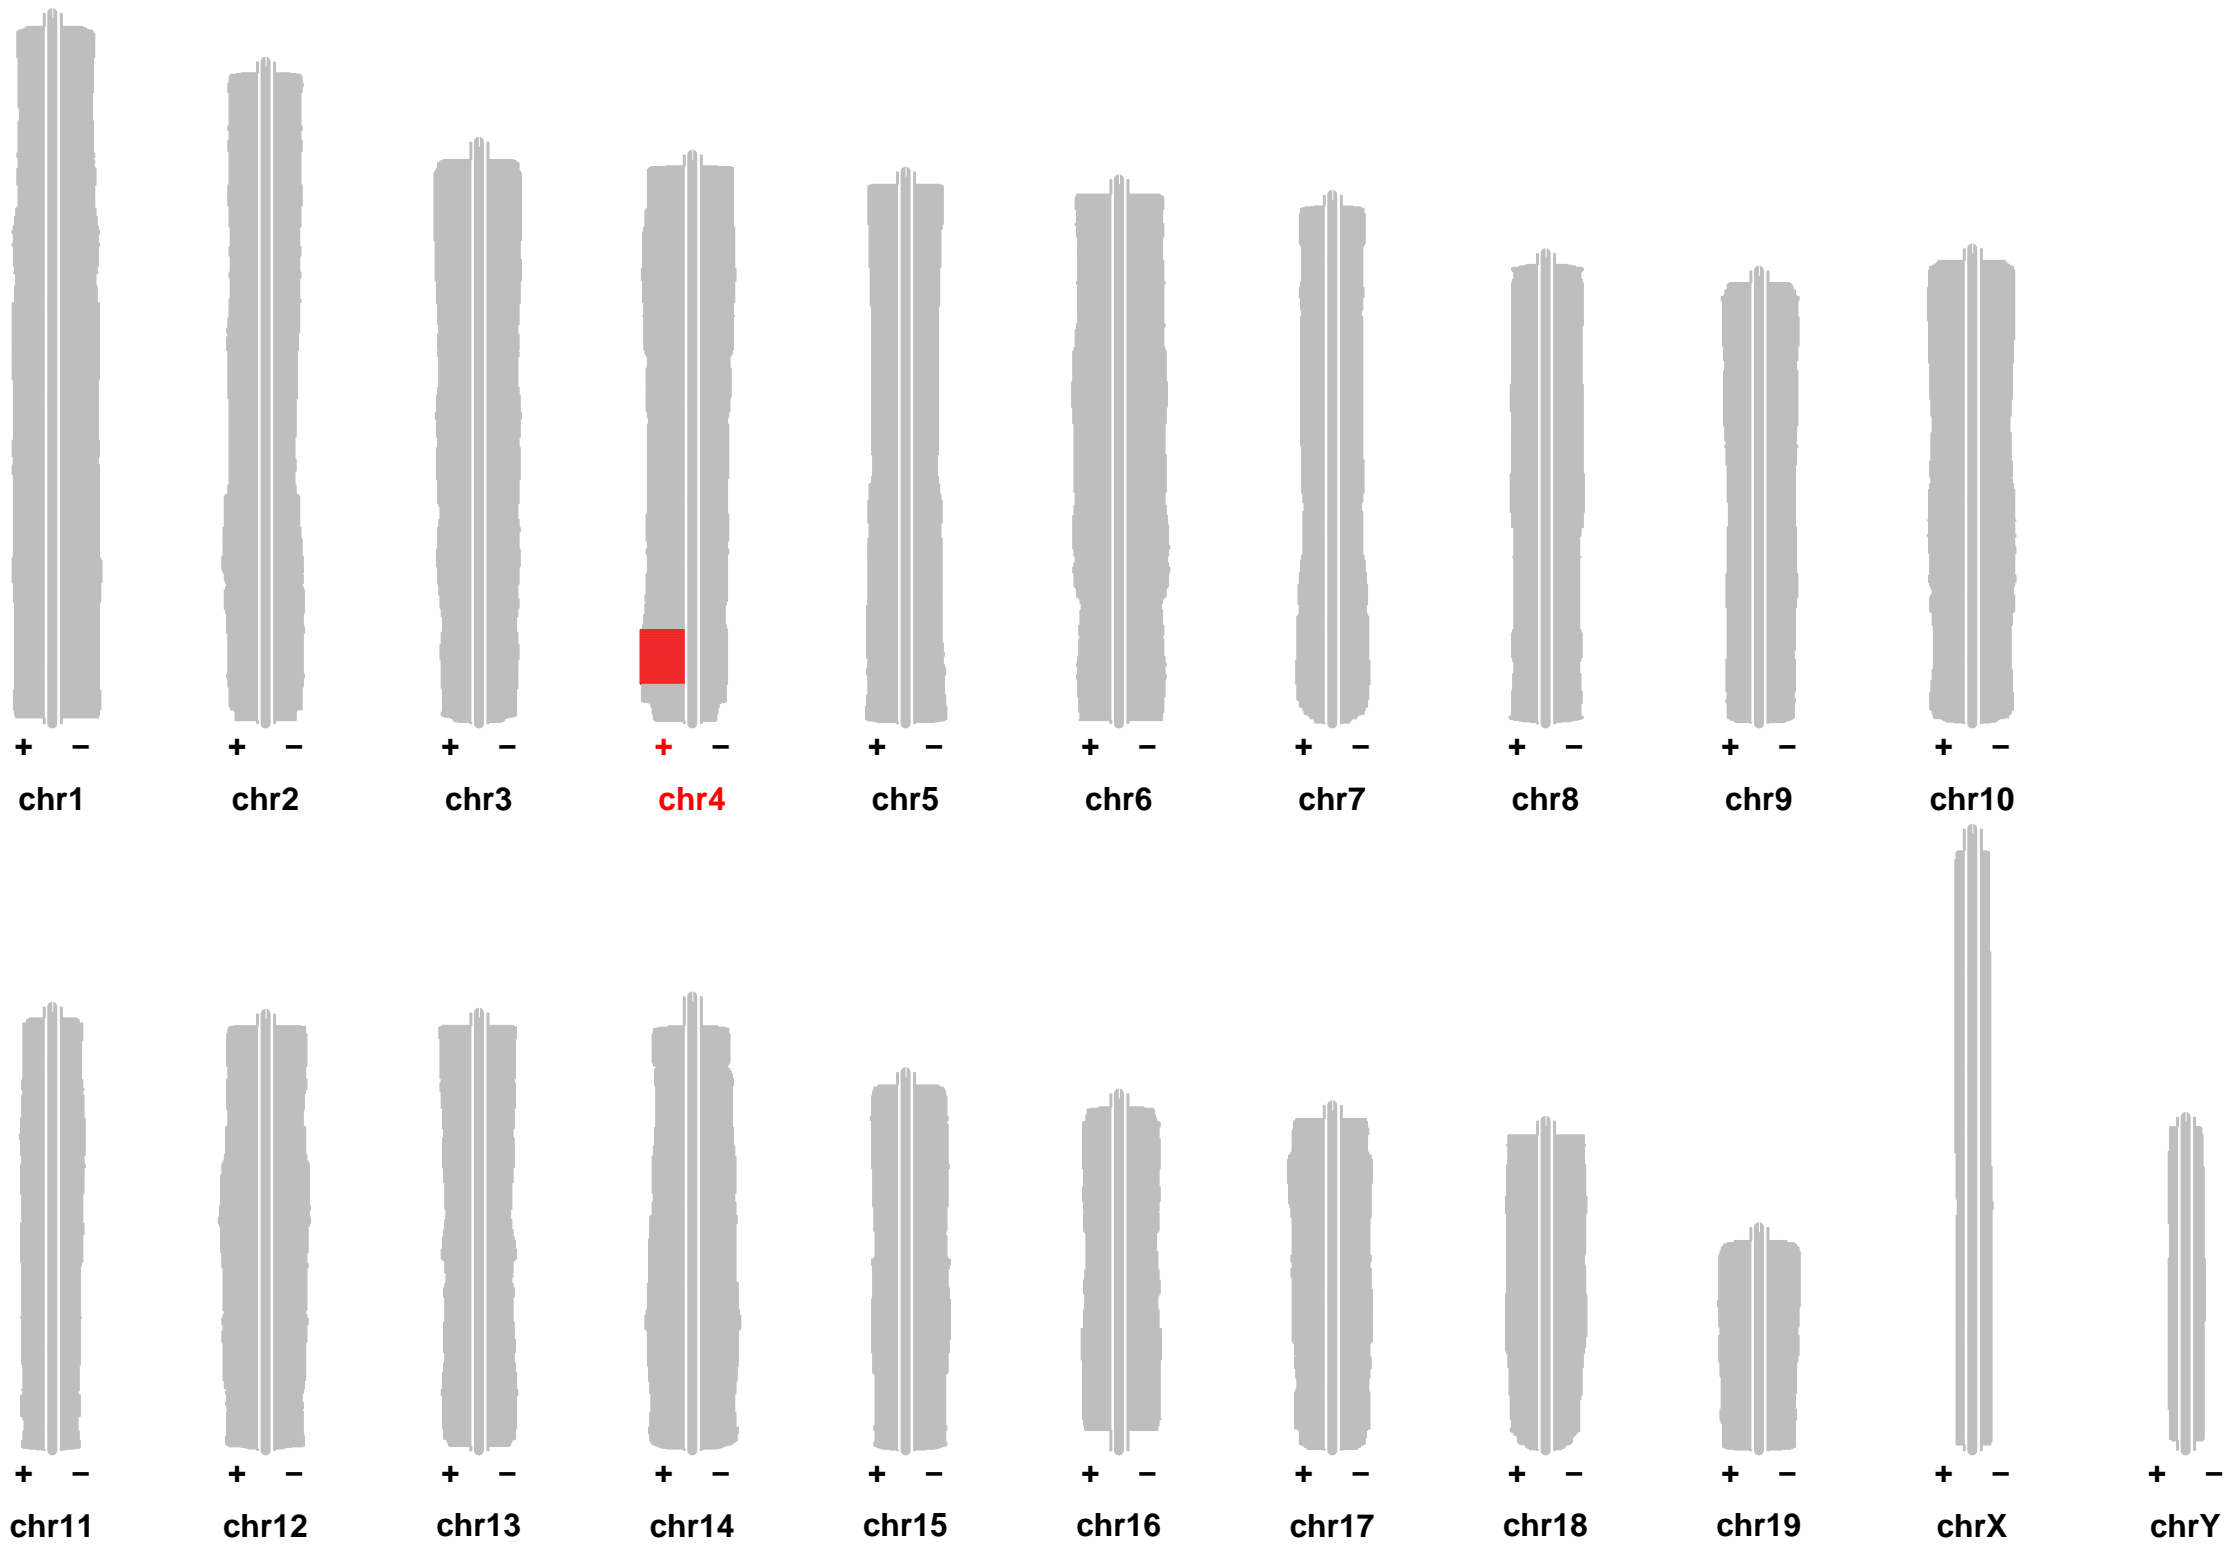

Quality filter=20

Fragment= chrUn\_GL456379 Organism= Mus\_musculus

Peak agreement= 97.83%

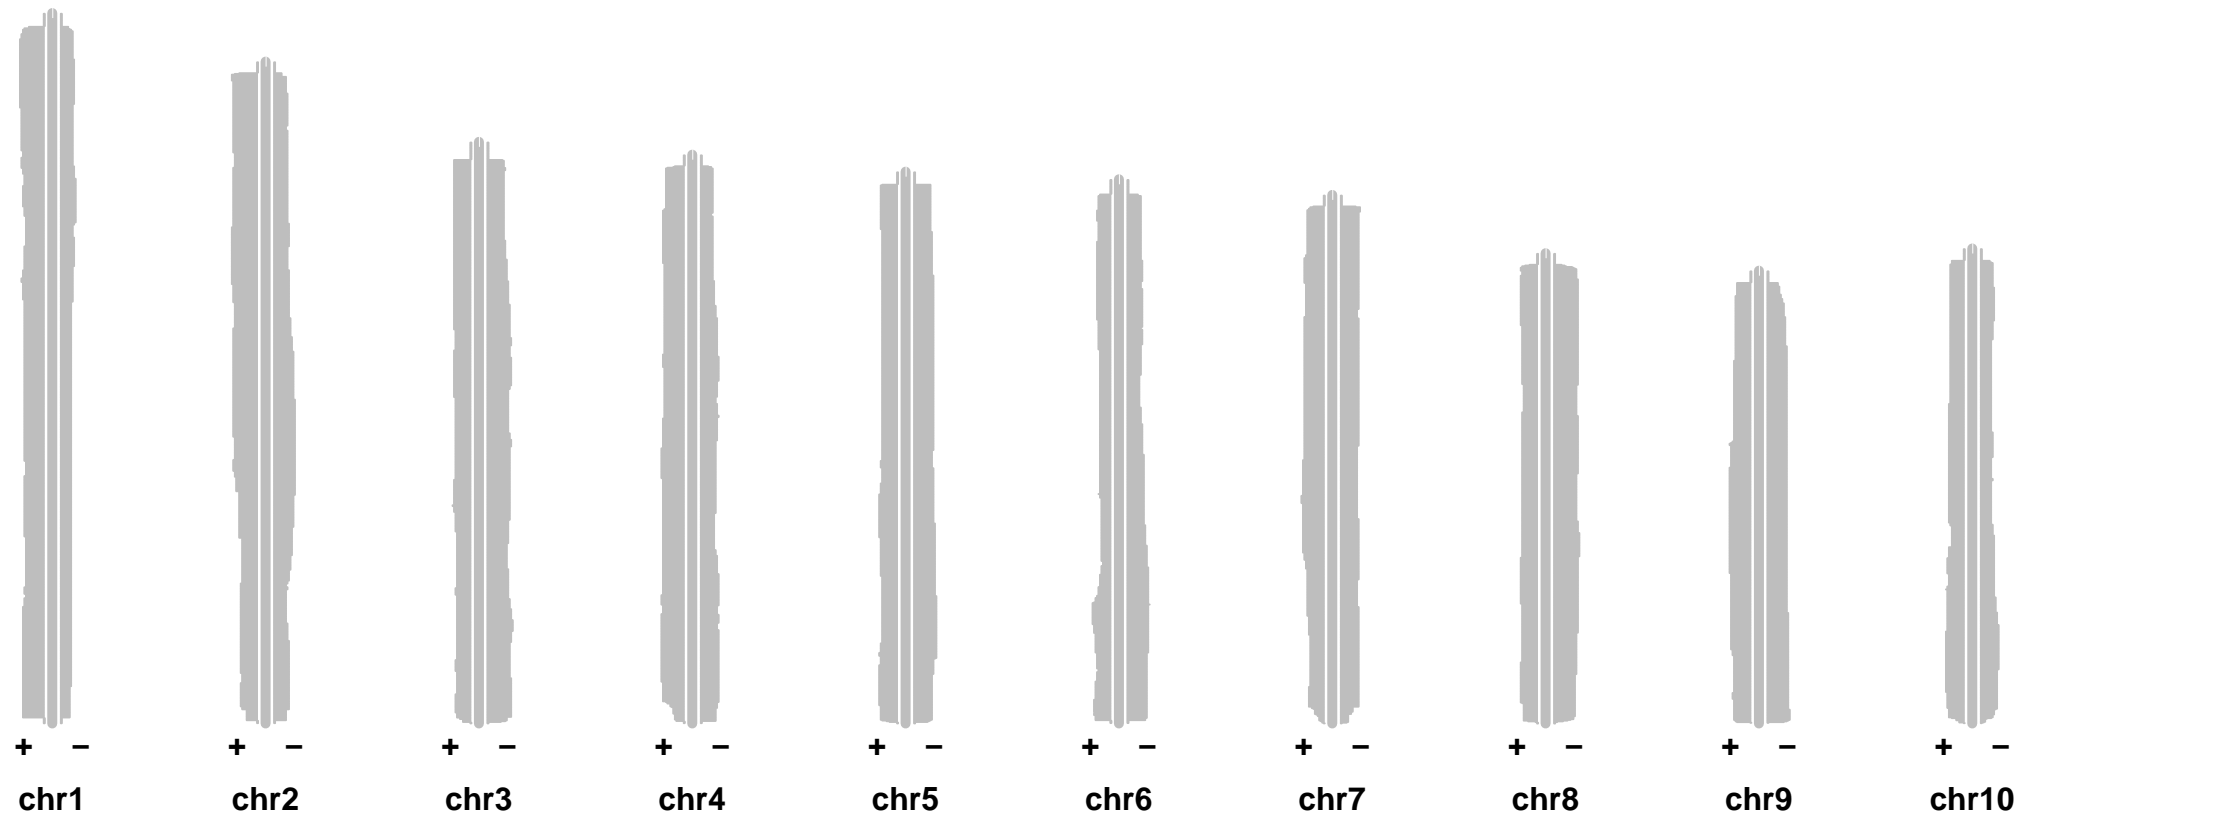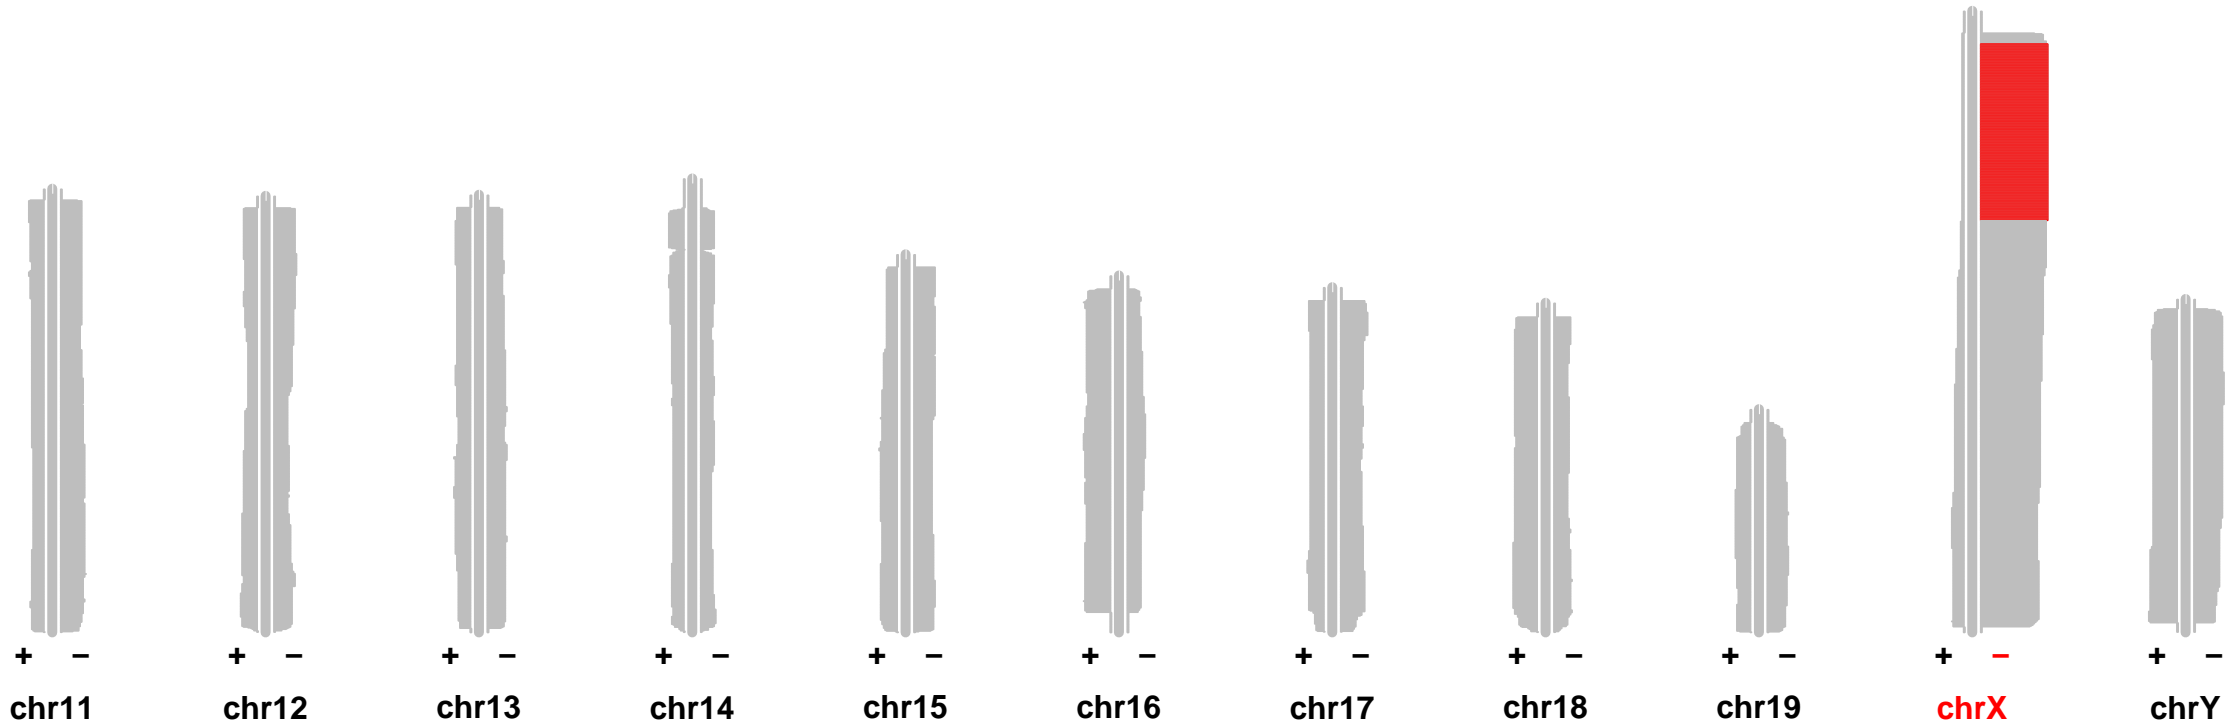

Quality filter=20

Fragment= chrUn\_GL456381 Organism= Mus\_musculus

Peak agreement= 93.88 %

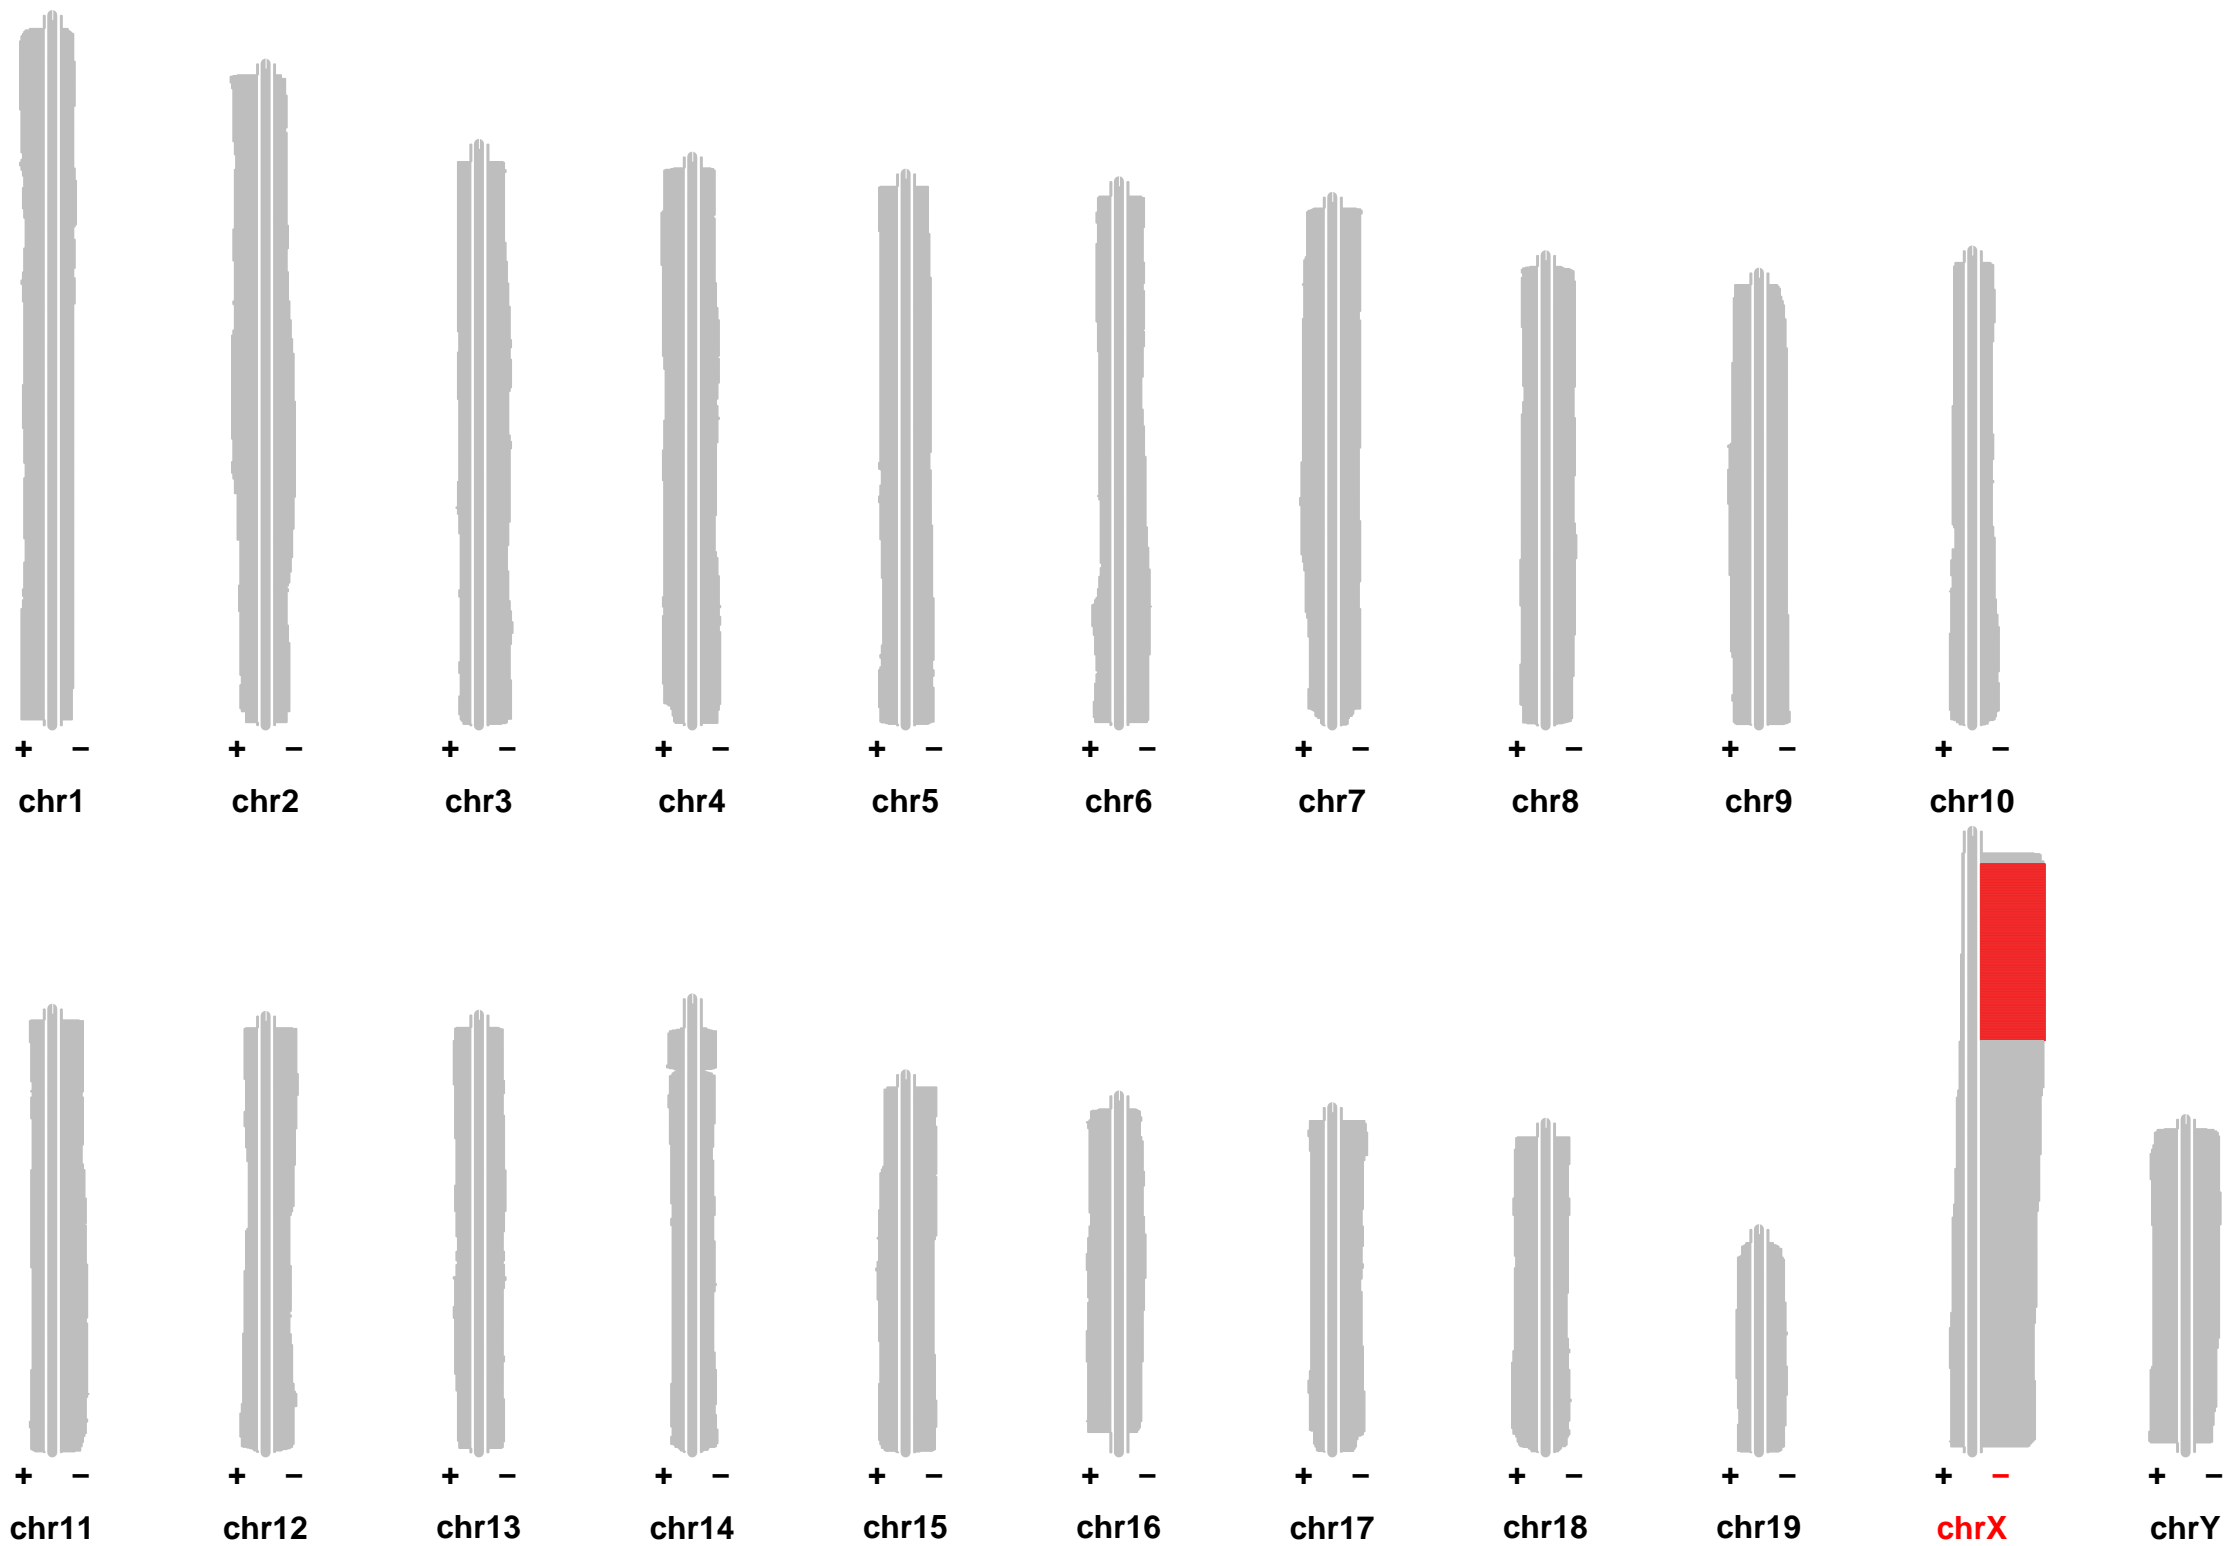

Quality filter=20

Fragment= chrUn\_GL456382 Organism= Mus\_musculus

Peak agreement= 95.24 %

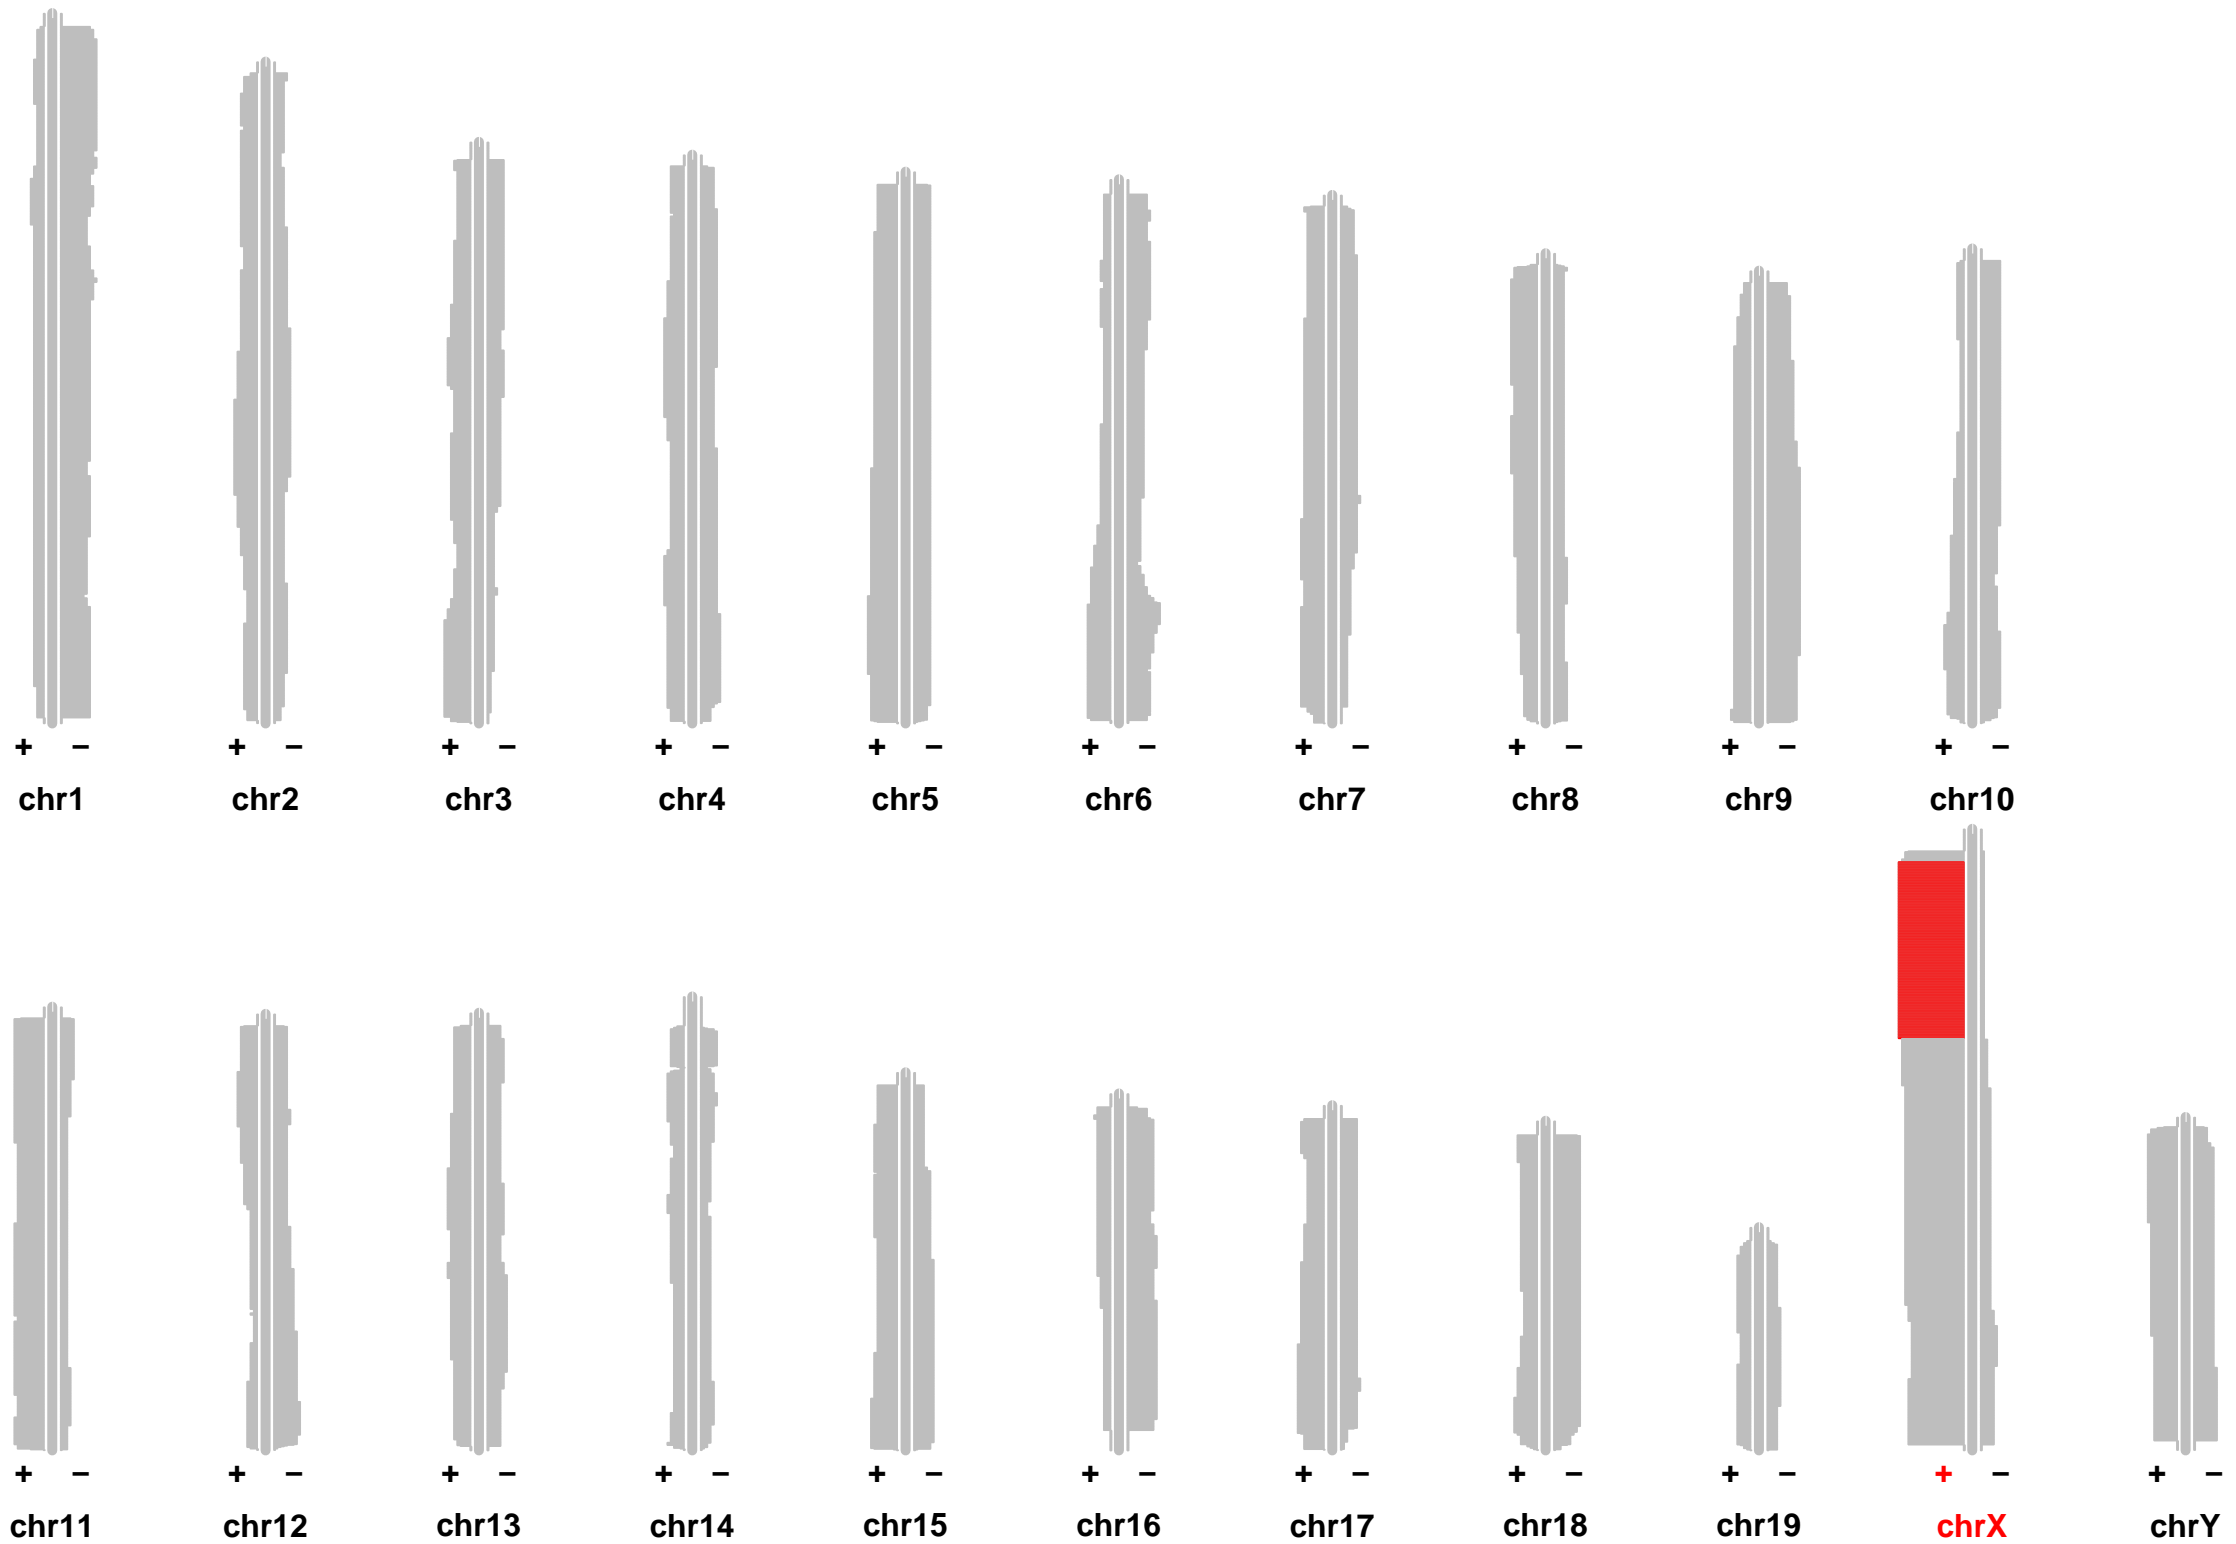

Quality filter=20

Fragment= chrUn\_GL456385 Organism= Mus\_musculus

Peak agreement= 82.69 %

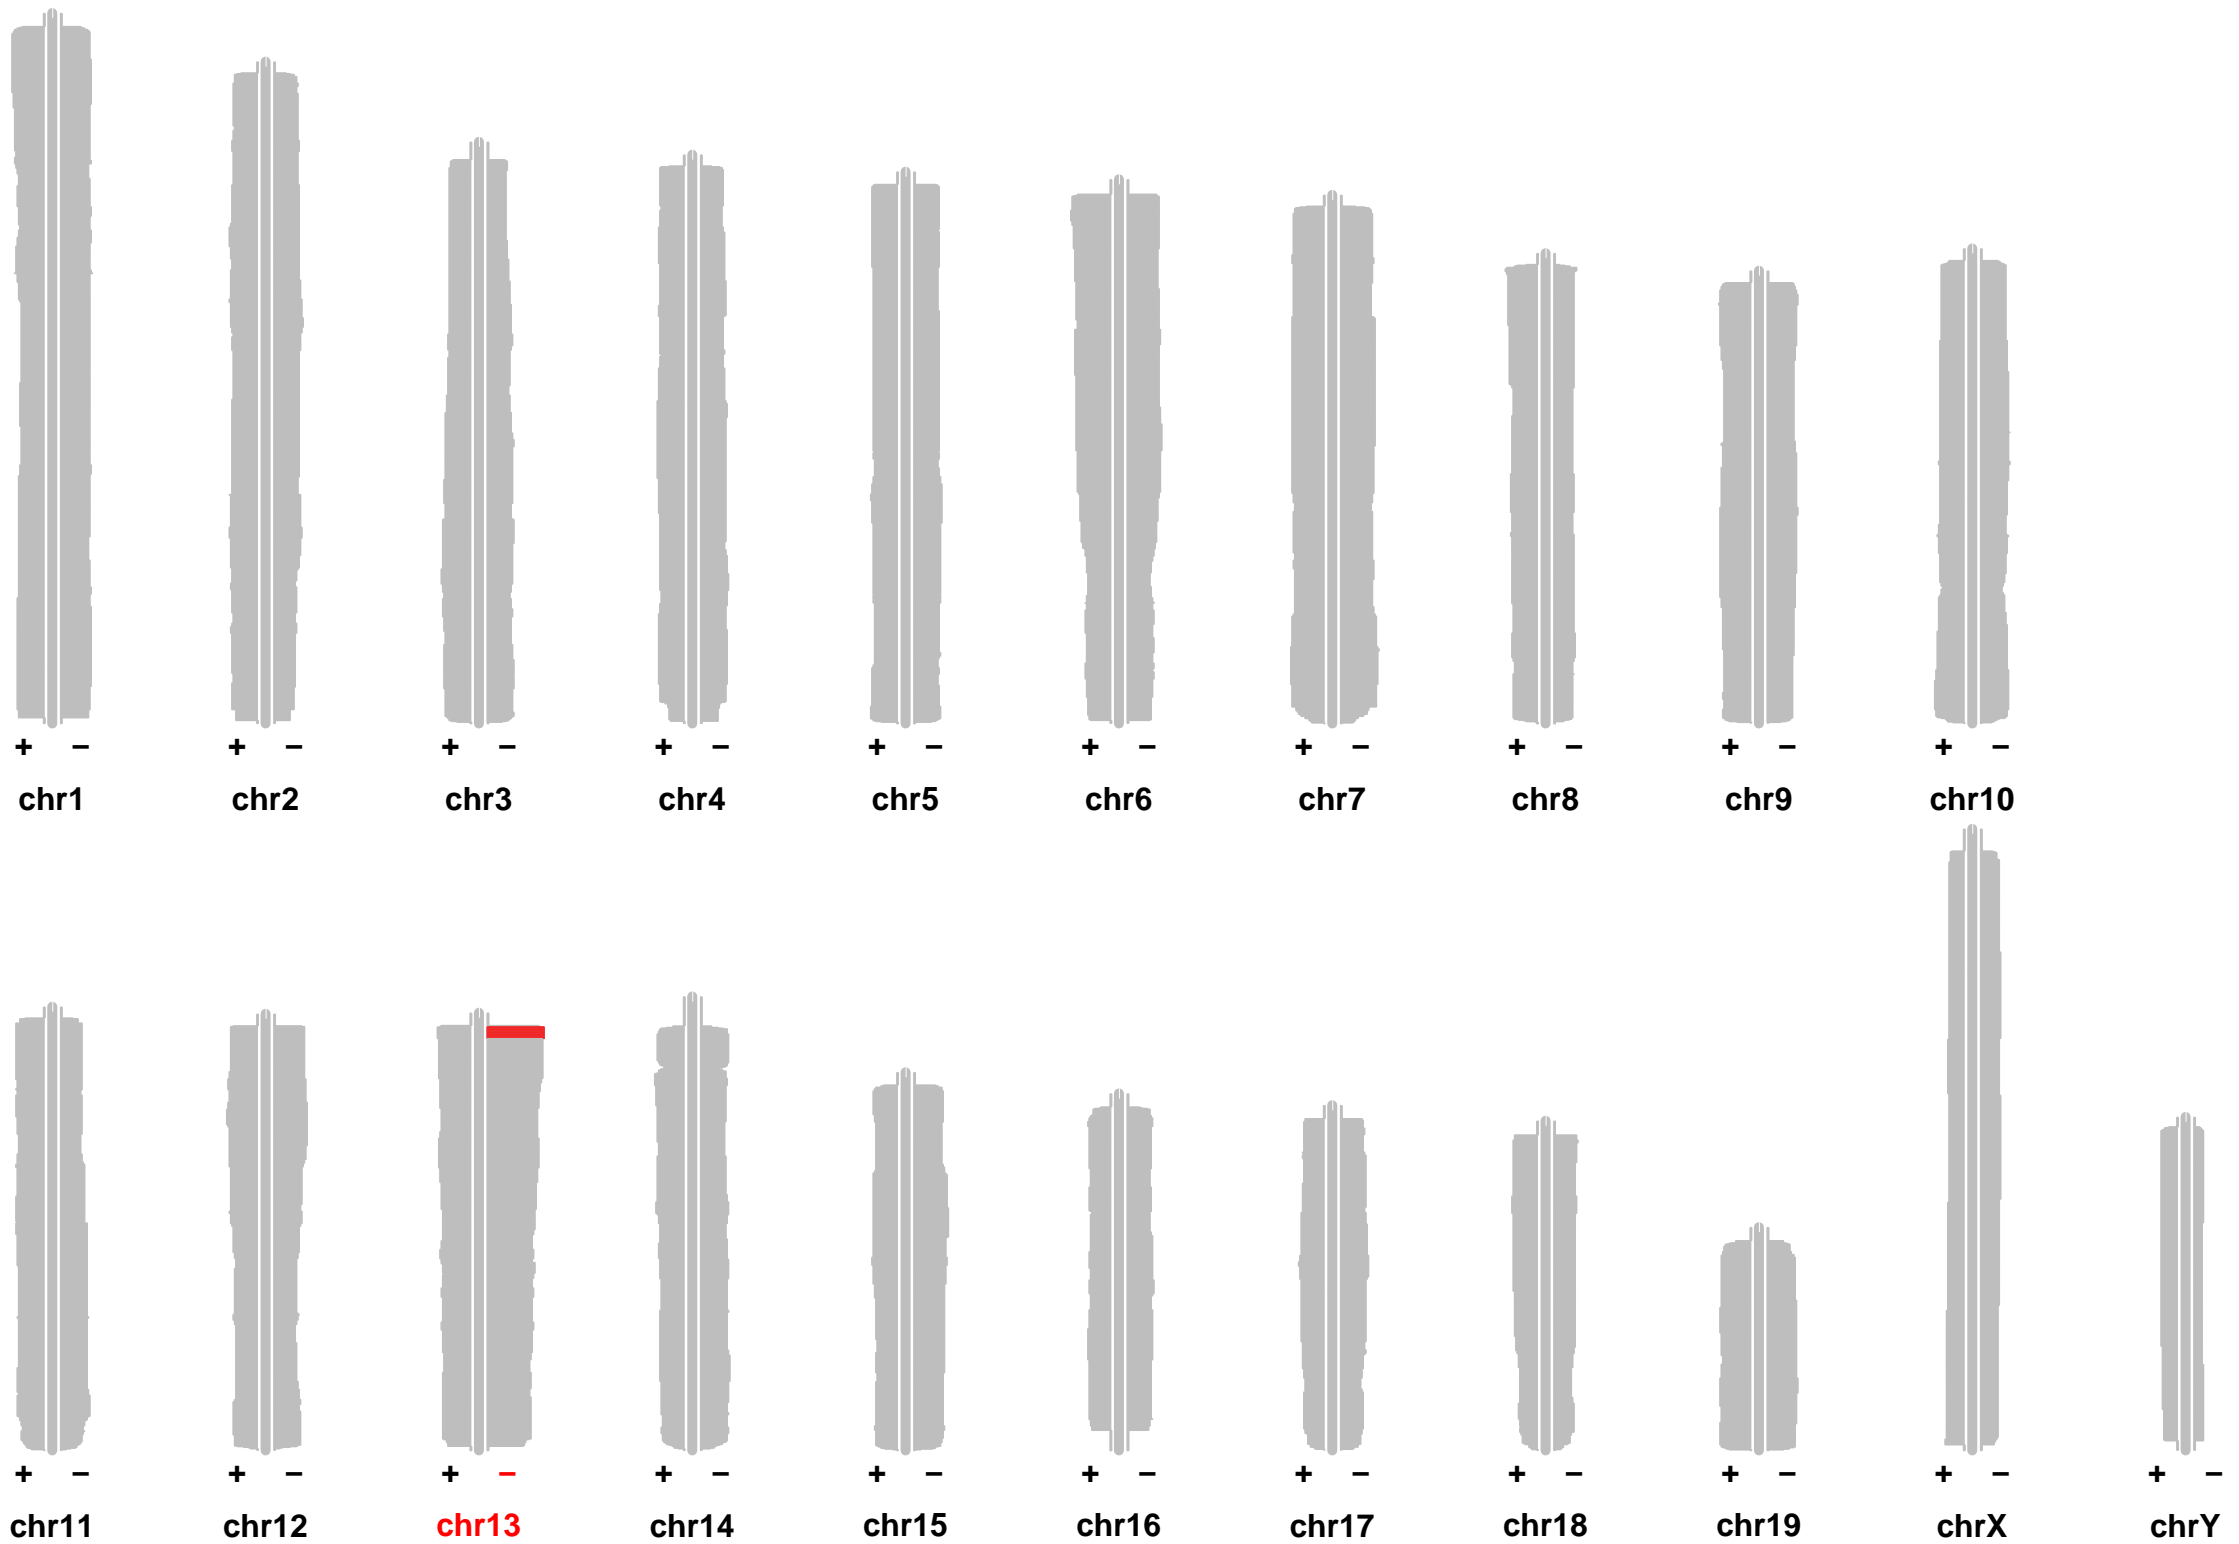

Quality filter=20

Fragment= chrUn\_GL456387 Organism= Mus\_musculus

Peak agreement= 71.93%

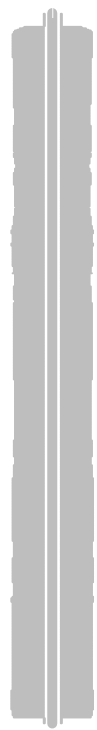

+ -  
chr1

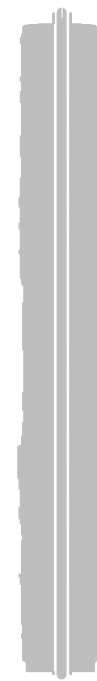

+ -  
chr2

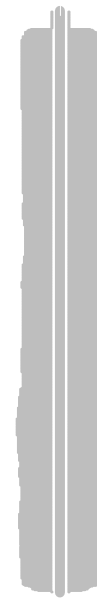

+ -  
chr3

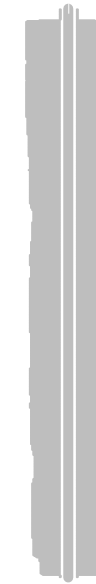

+ -  
chr4

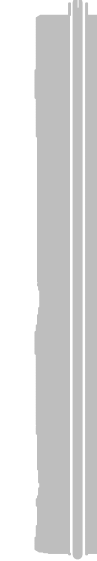

+ -  
chr5

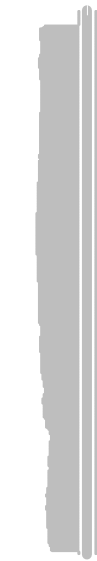

+ -  
chr6

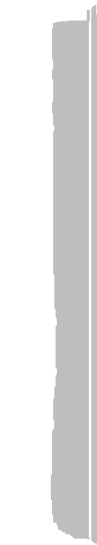

+ -  
chr7

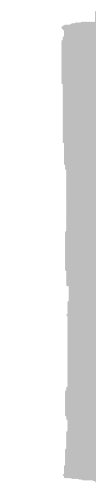

+ -  
chr8

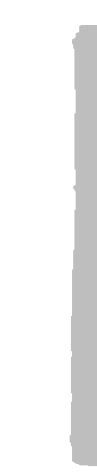

+ -  
chr9

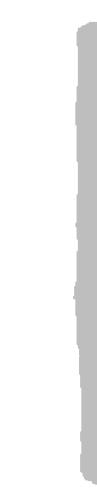

+ -  
chr10

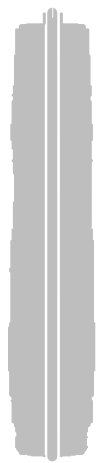

+ -  
chr11

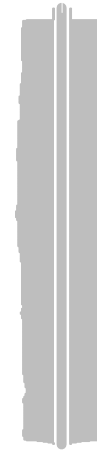

+ -  
chr12

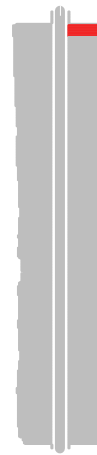

+ -  
chr13

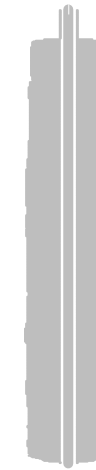

+ -  
chr14

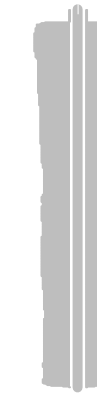

+ -  
chr15

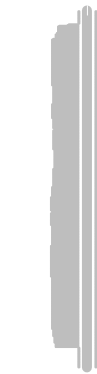

+ -  
chr16

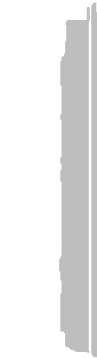

+ -  
chr17

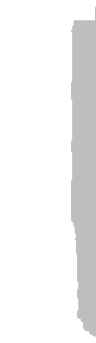

+ -  
chr18

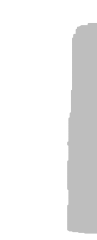

+ -  
chr19

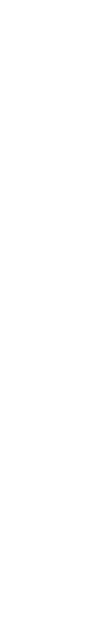

+ -  
chrX

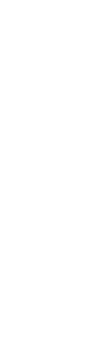

+ -  
chrY

Quality filter=20

Fragment= chrUn\_GL456389 Organism= Mus\_musculus

Peak agreement= 73.53%

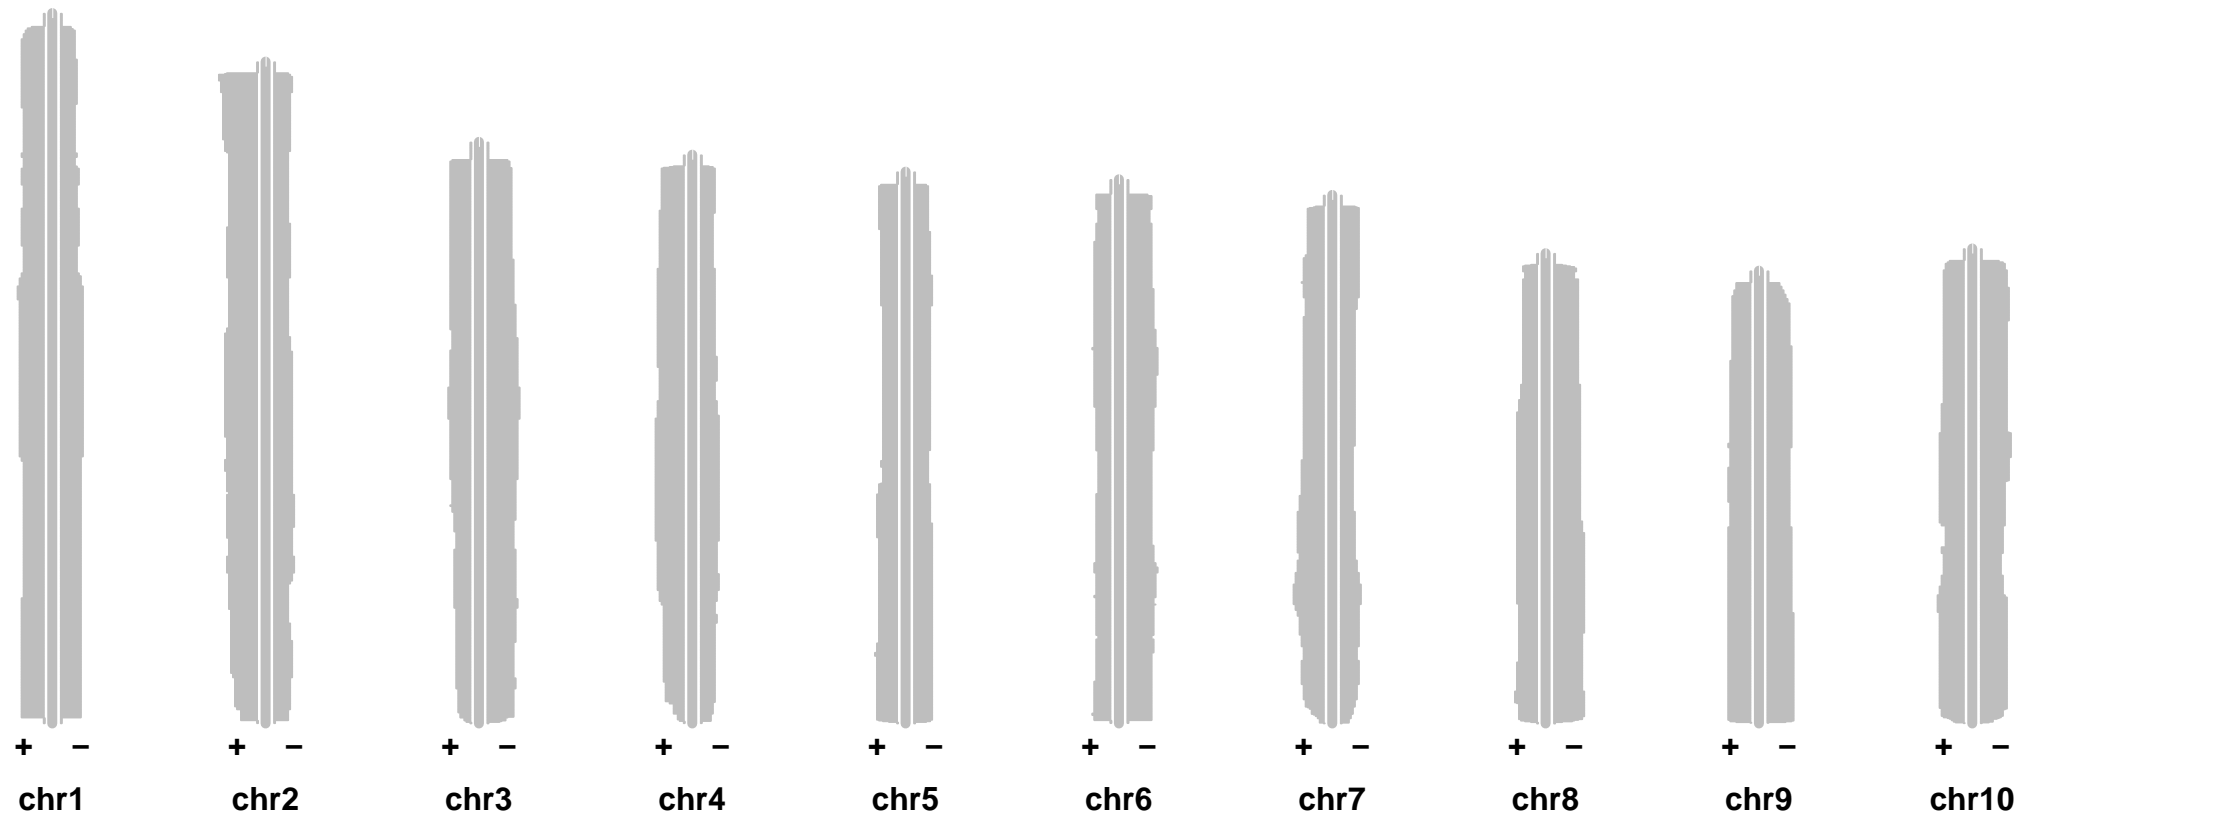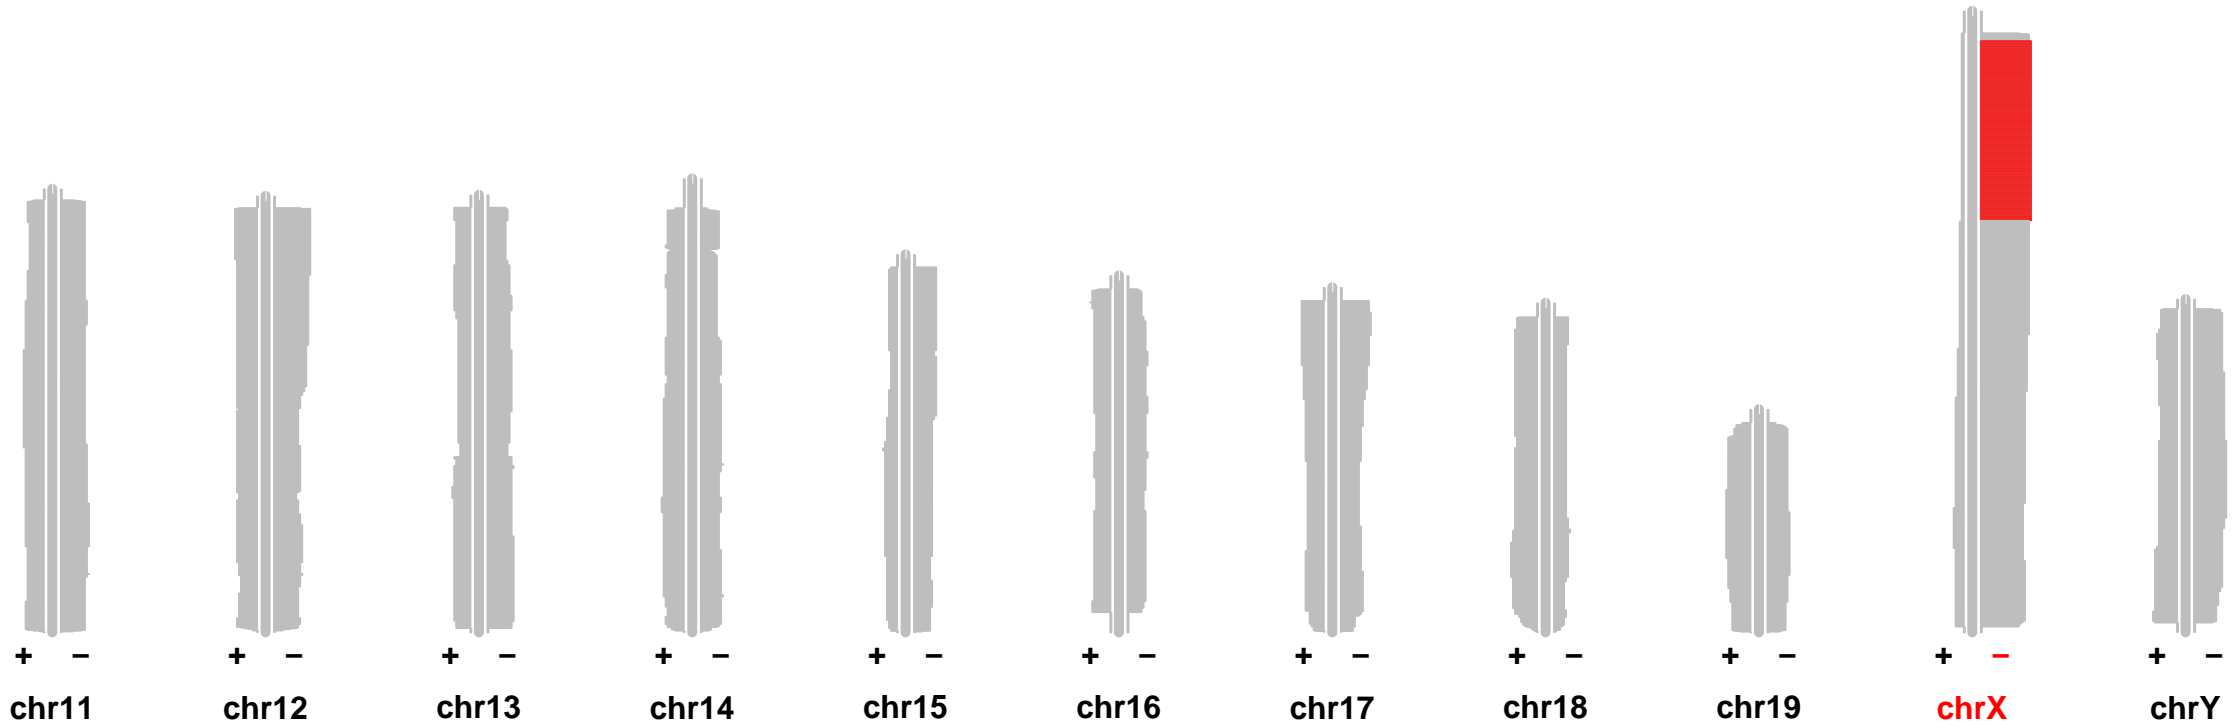

Quality filter=20

Fragment= chrUn\_GL456392 Organism= Mus\_musculus

Peak agreement= 79.41 %

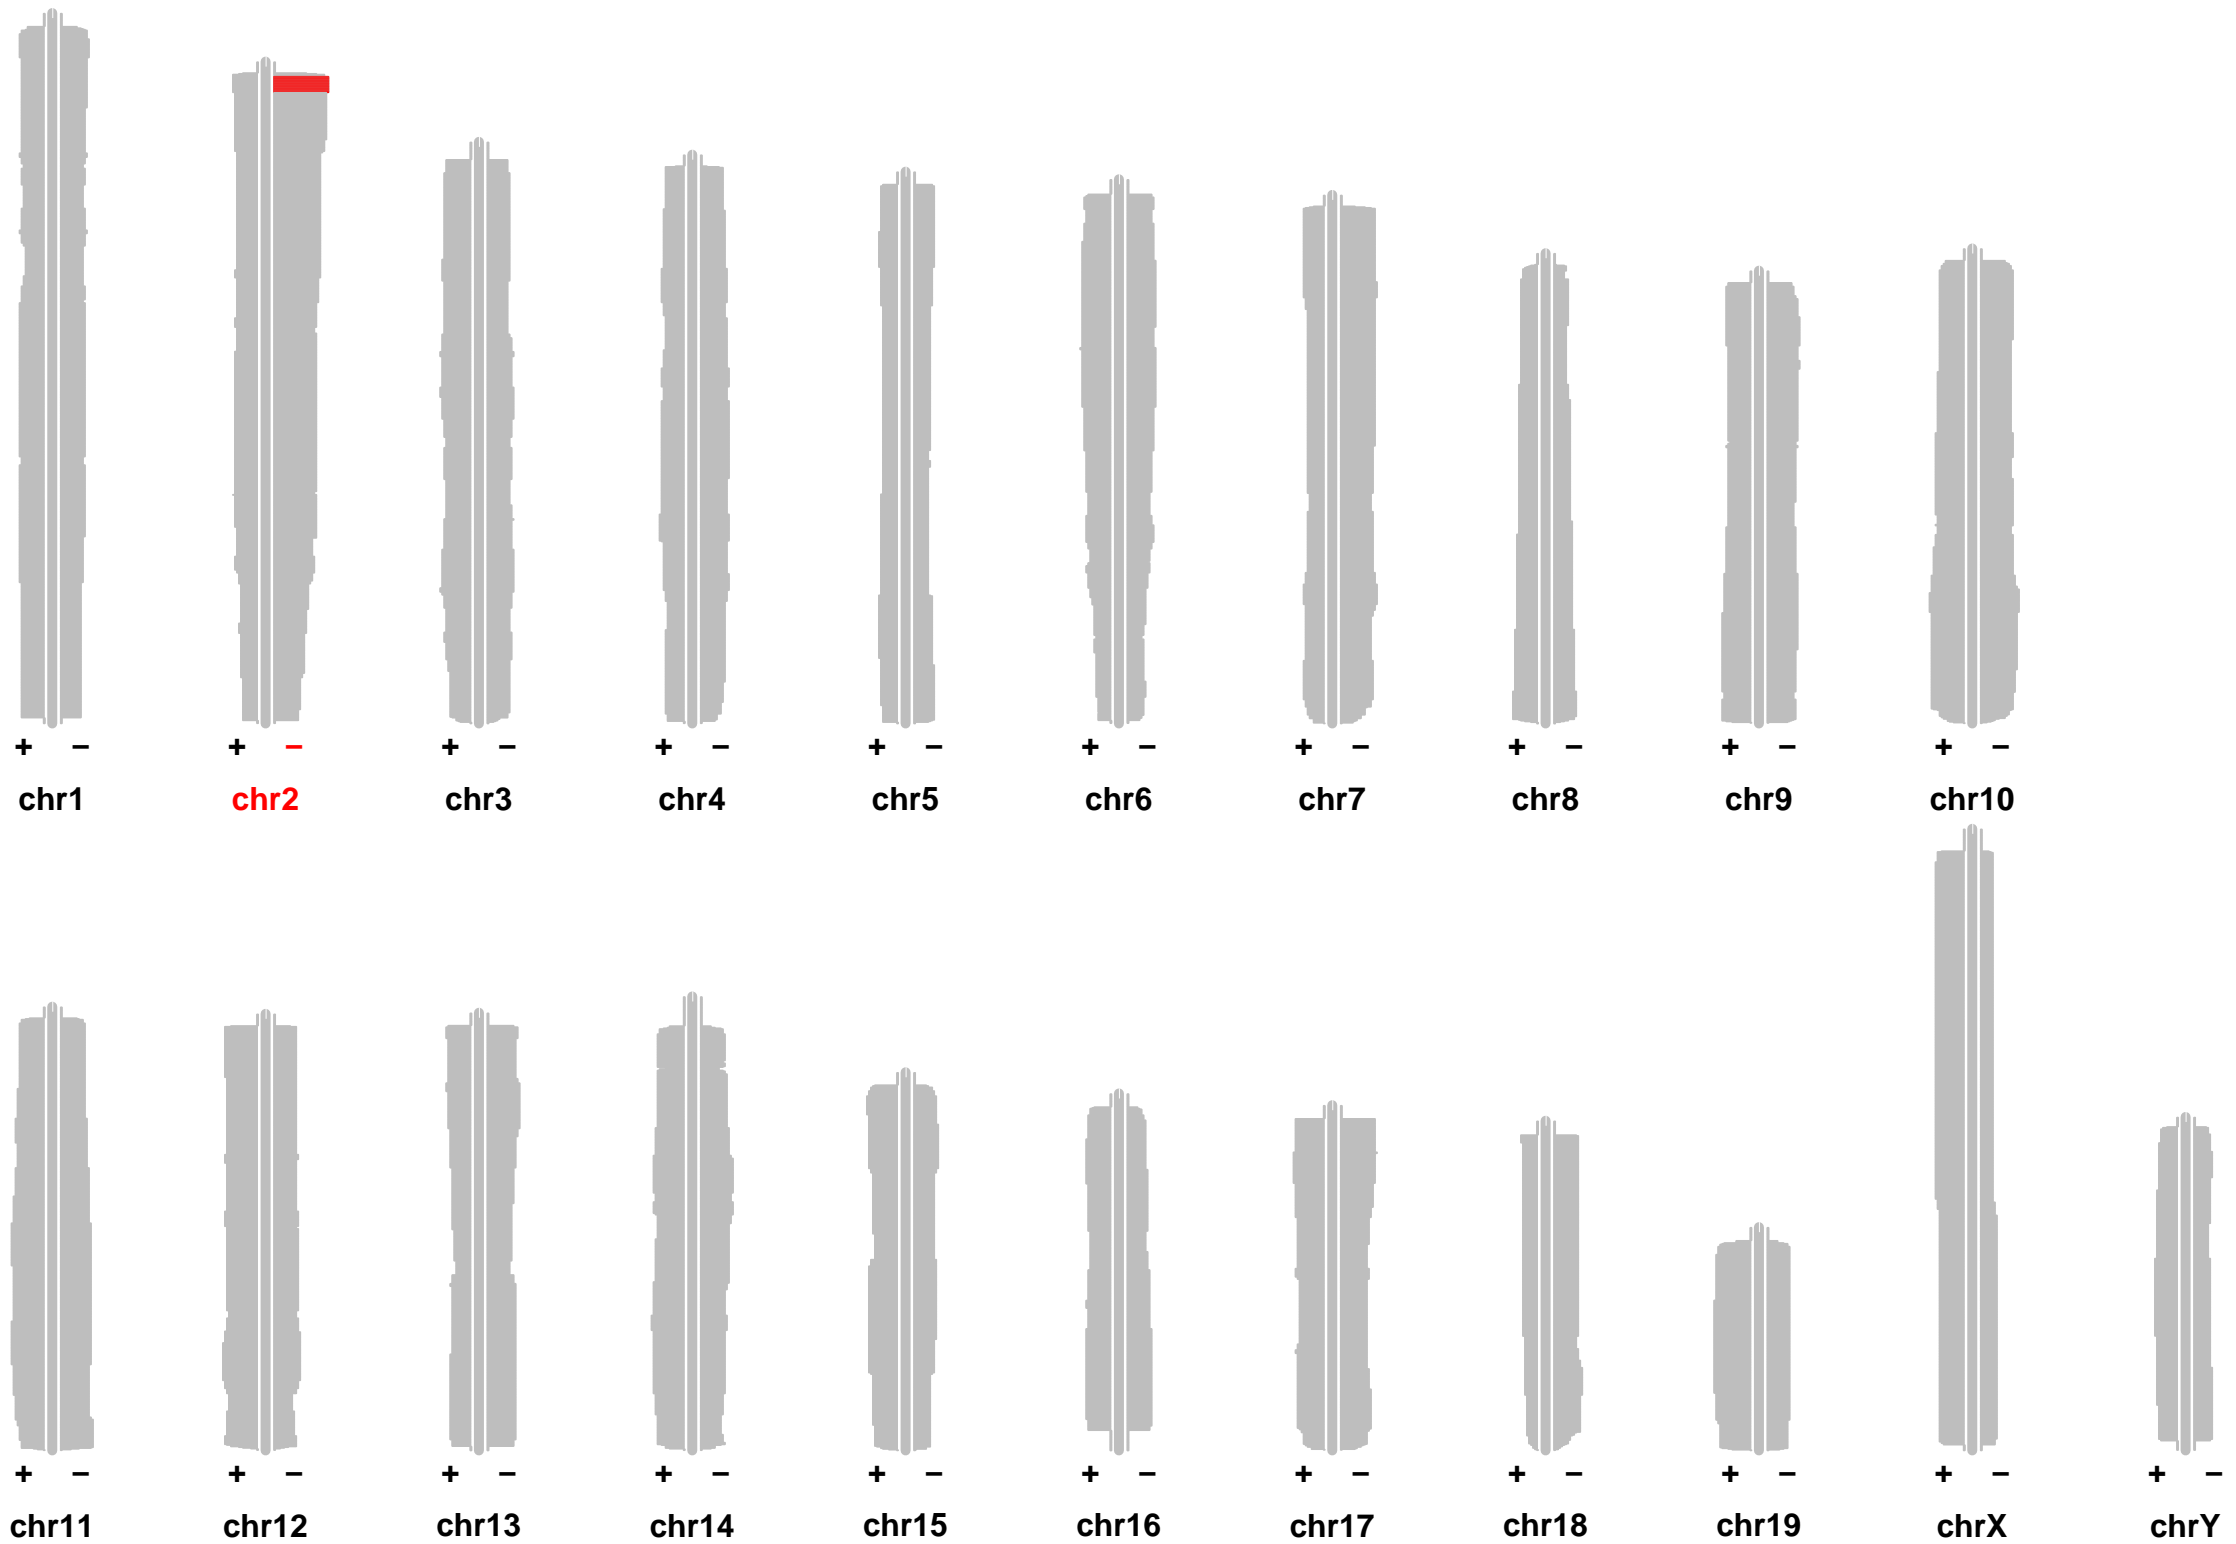

Quality filter=20



Fragment= chrUn\_GL456393 Organism= Mus\_musculus

Peak agreement= 89.29 %

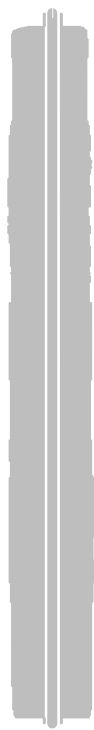

+ -  
chr1

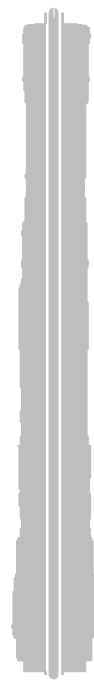

+ -  
chr2

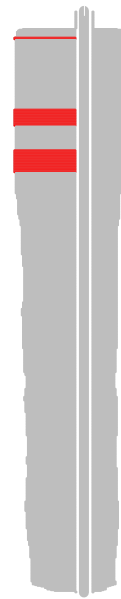

+ -  
chr3

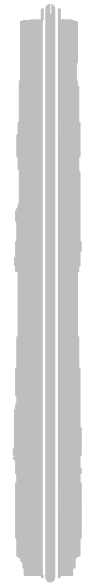

+ -  
chr4

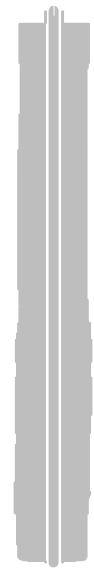

+ -  
chr5

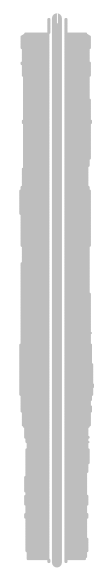

+ -  
chr6

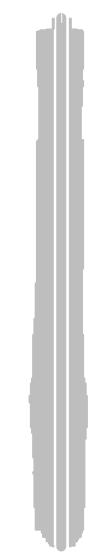

+ -  
chr7

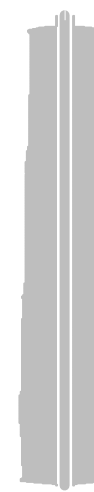

+ -  
chr8

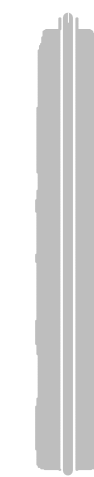

+ -  
chr9

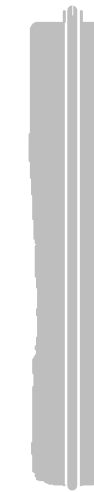

+ -  
chr10

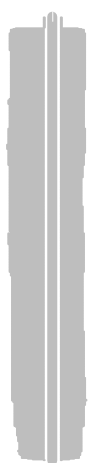

+ -  
chr11

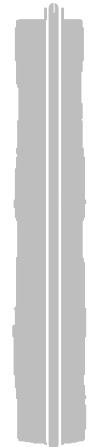

+ -  
chr12

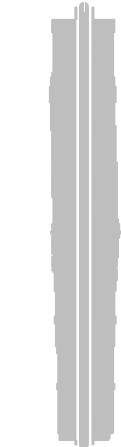

+ -  
chr13

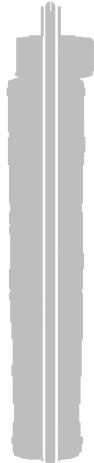

+ -  
chr14

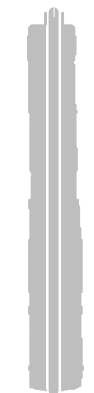

+ -  
chr15

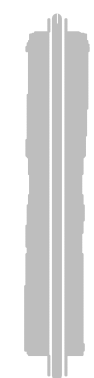

+ -  
chr16

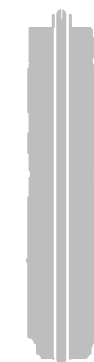

+ -  
chr17

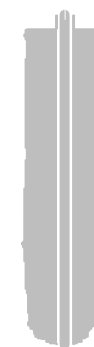

+ -  
chr18

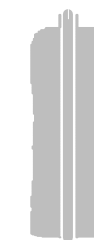

+ -  
chr19

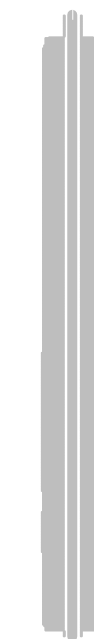

+ -  
chrX

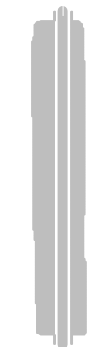

+ -  
chrY

Quality filter=20

Fragment= chrUn\_GL456394 Organism= Mus\_musculus

Peak agreement= 77.78%

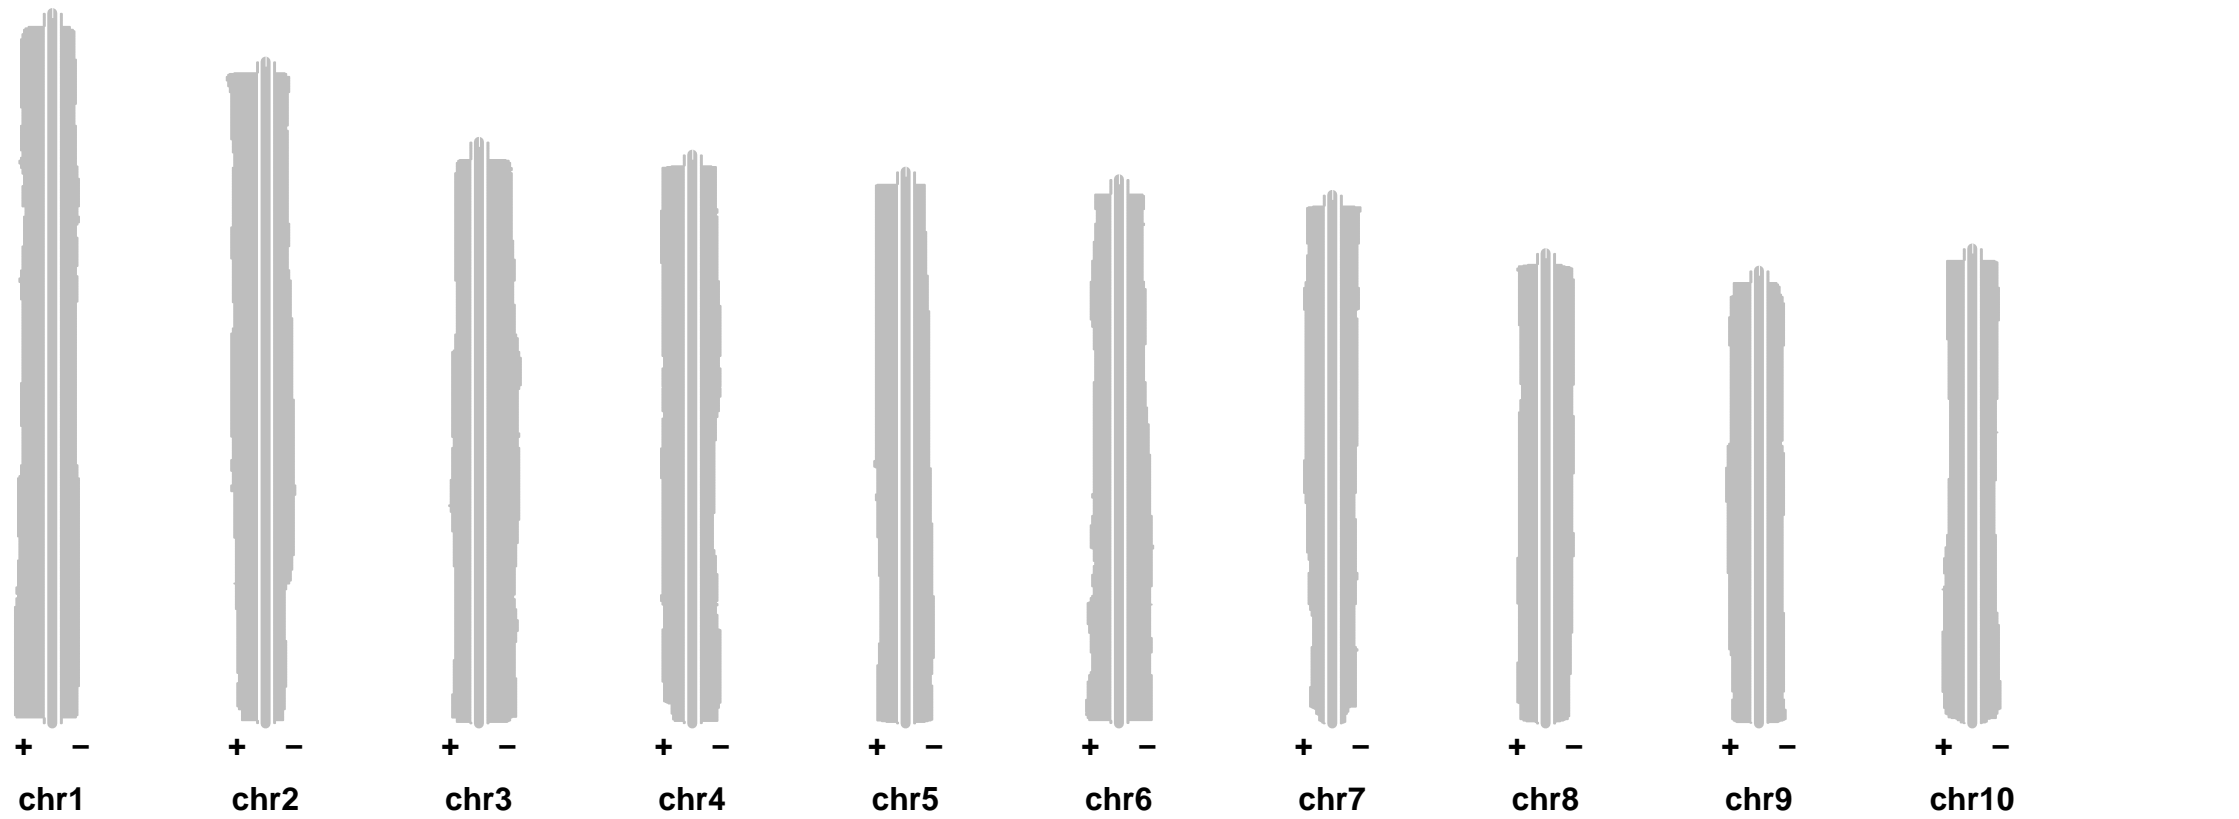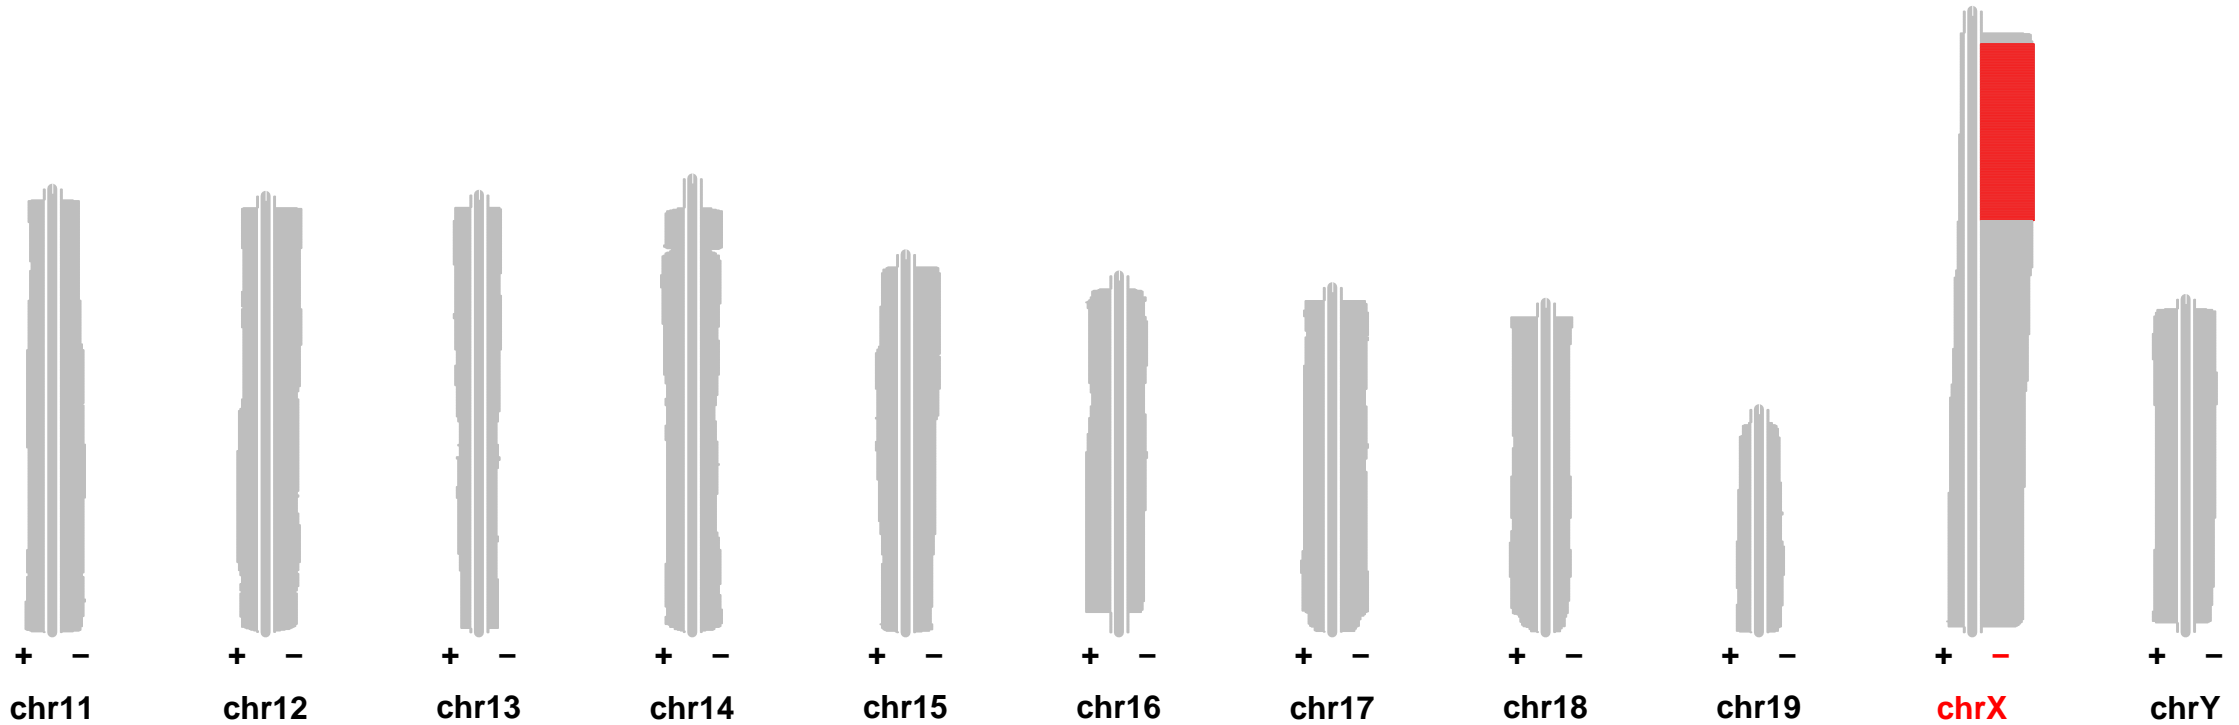

Quality filter=20

Fragment= chrUn\_GL456396 Organism= Mus\_musculus

Peak agreement= 90.48 %

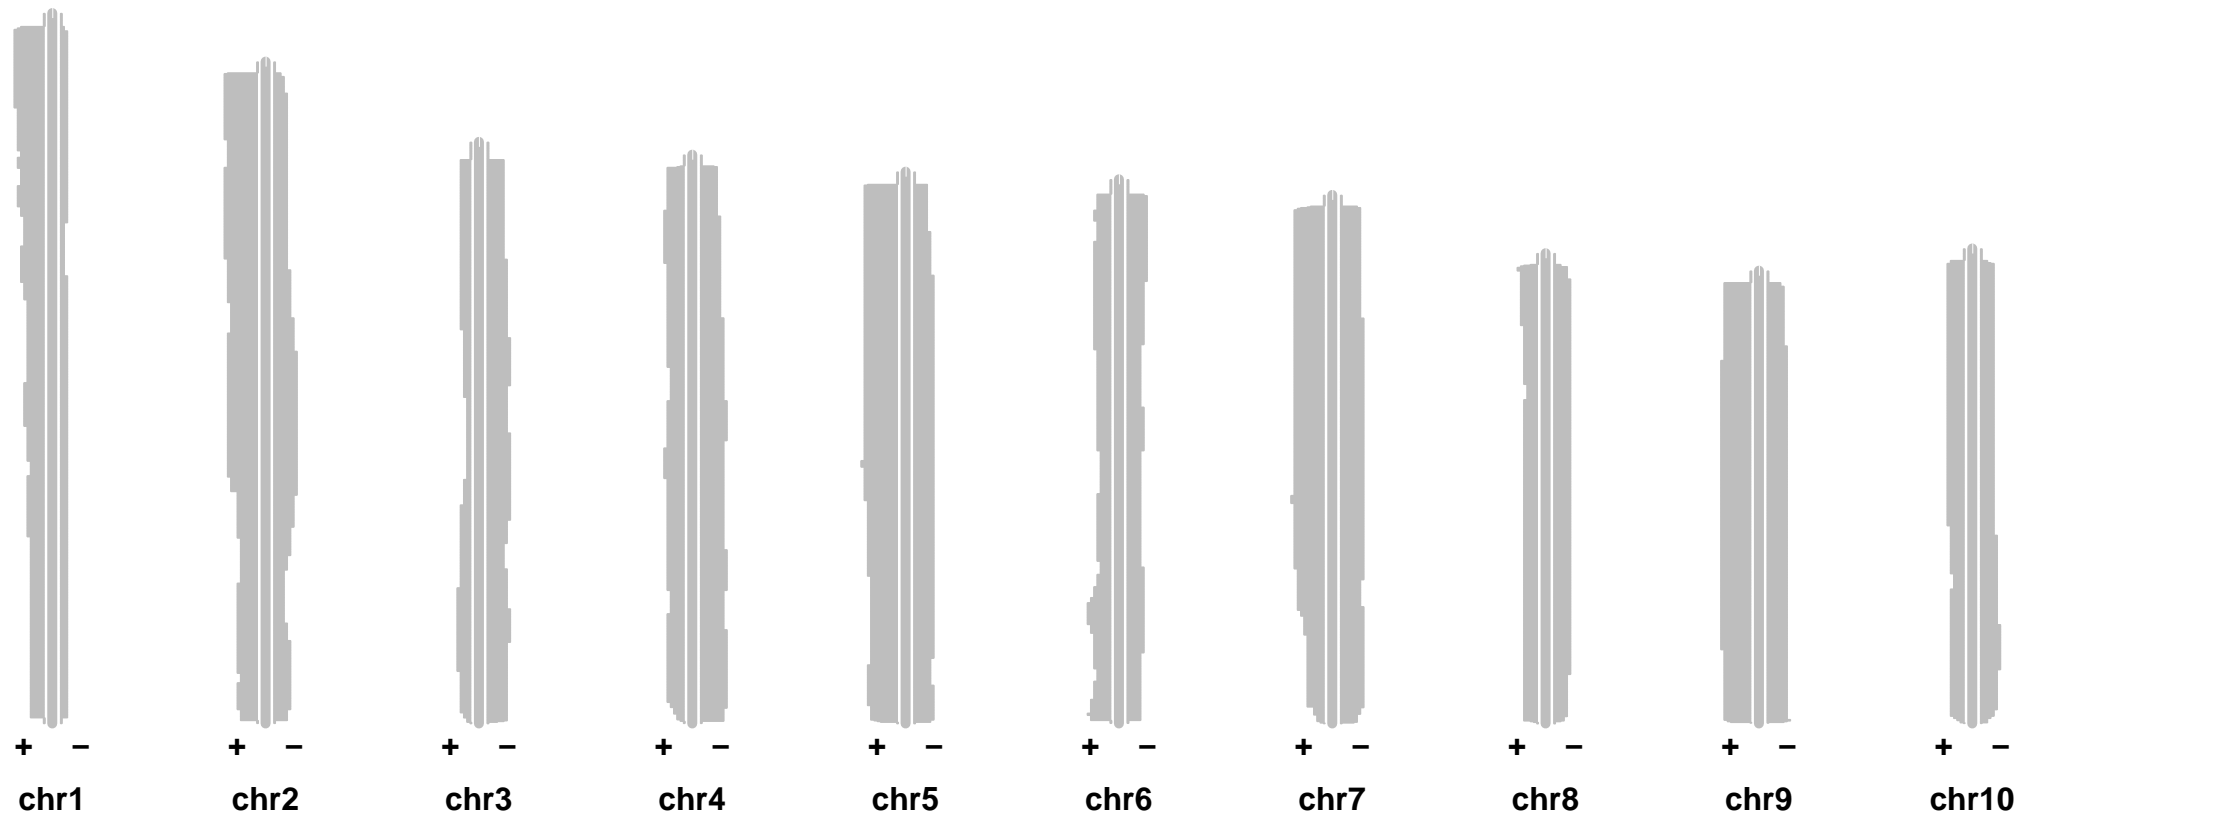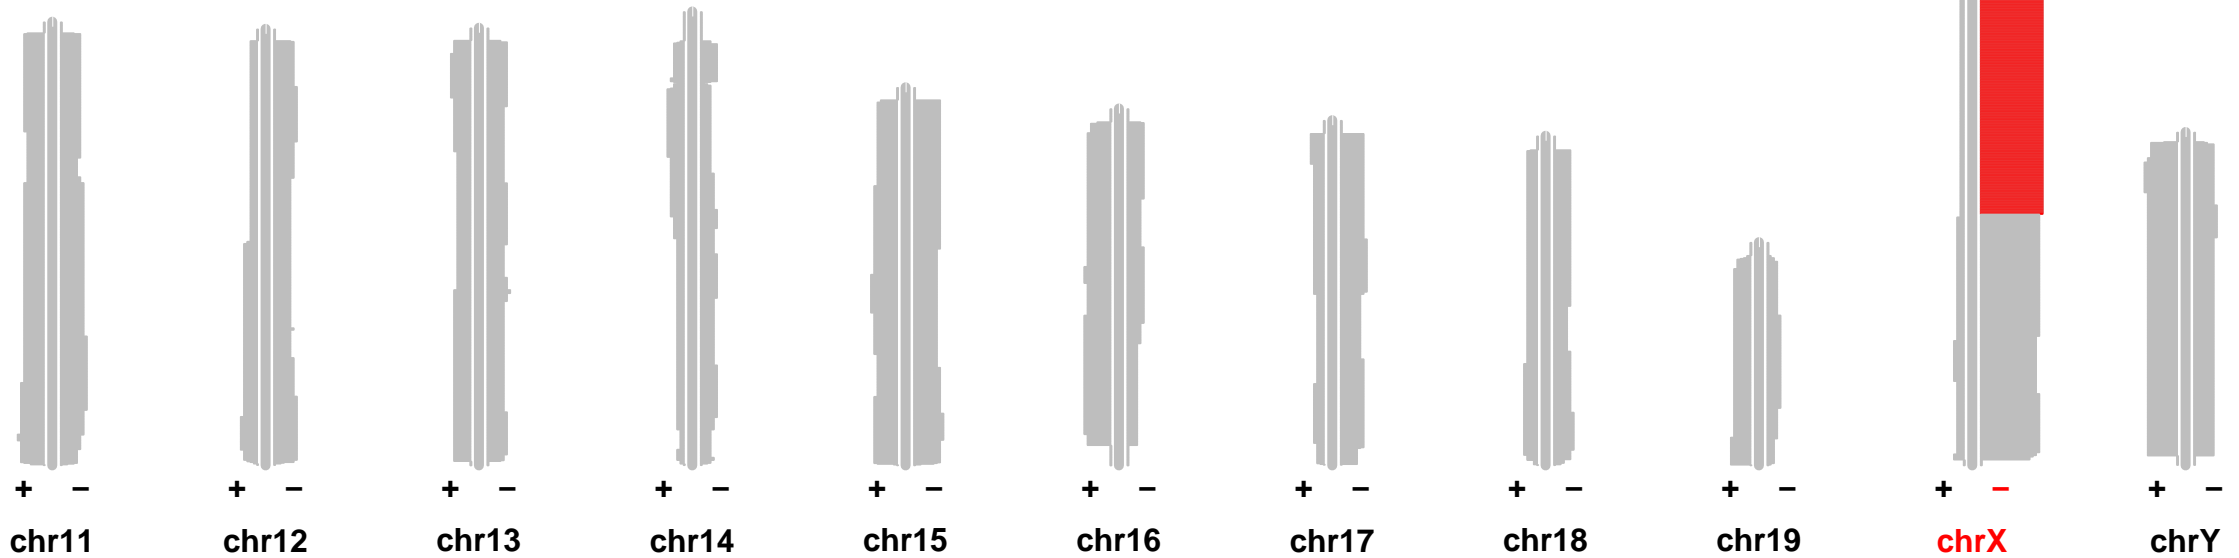

Quality filter=20

Fragment= chrUn\_JH584304 Organism= Mus\_musculus

Peak agreement= 64.91 %

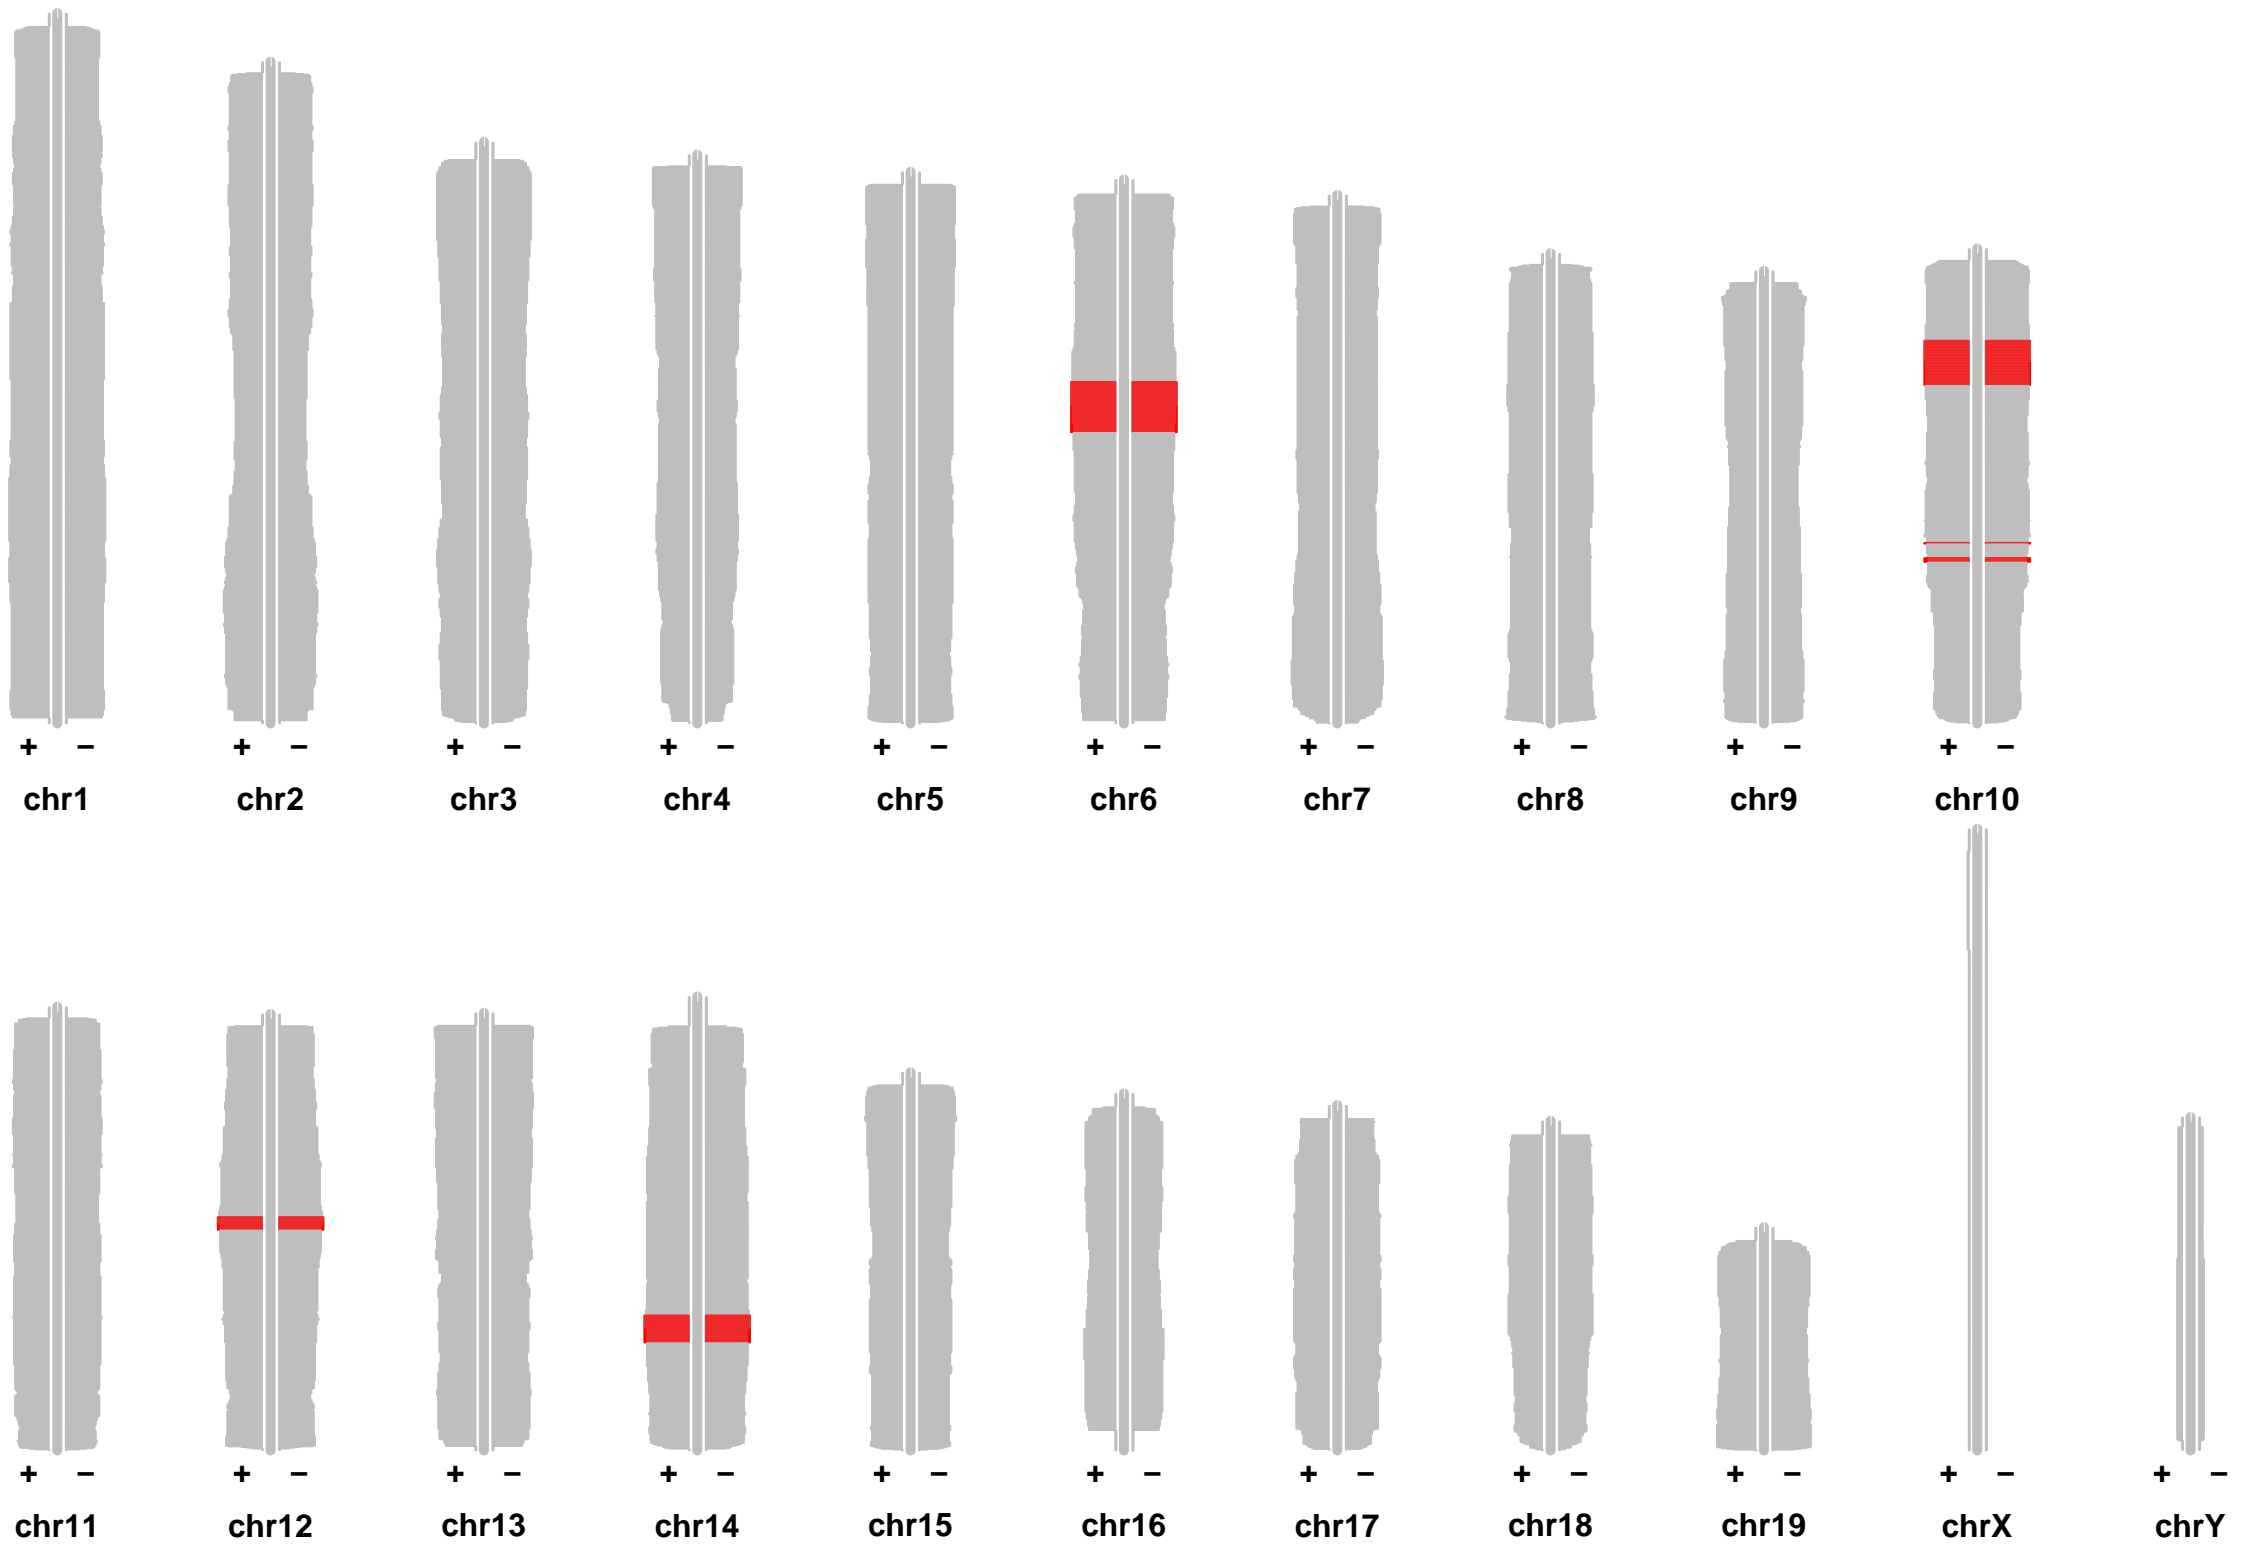

Quality filter=20

Fragment= chrX\_GL456233\_random Organism= Mus\_musculus

Peak agreement= 96.08 %

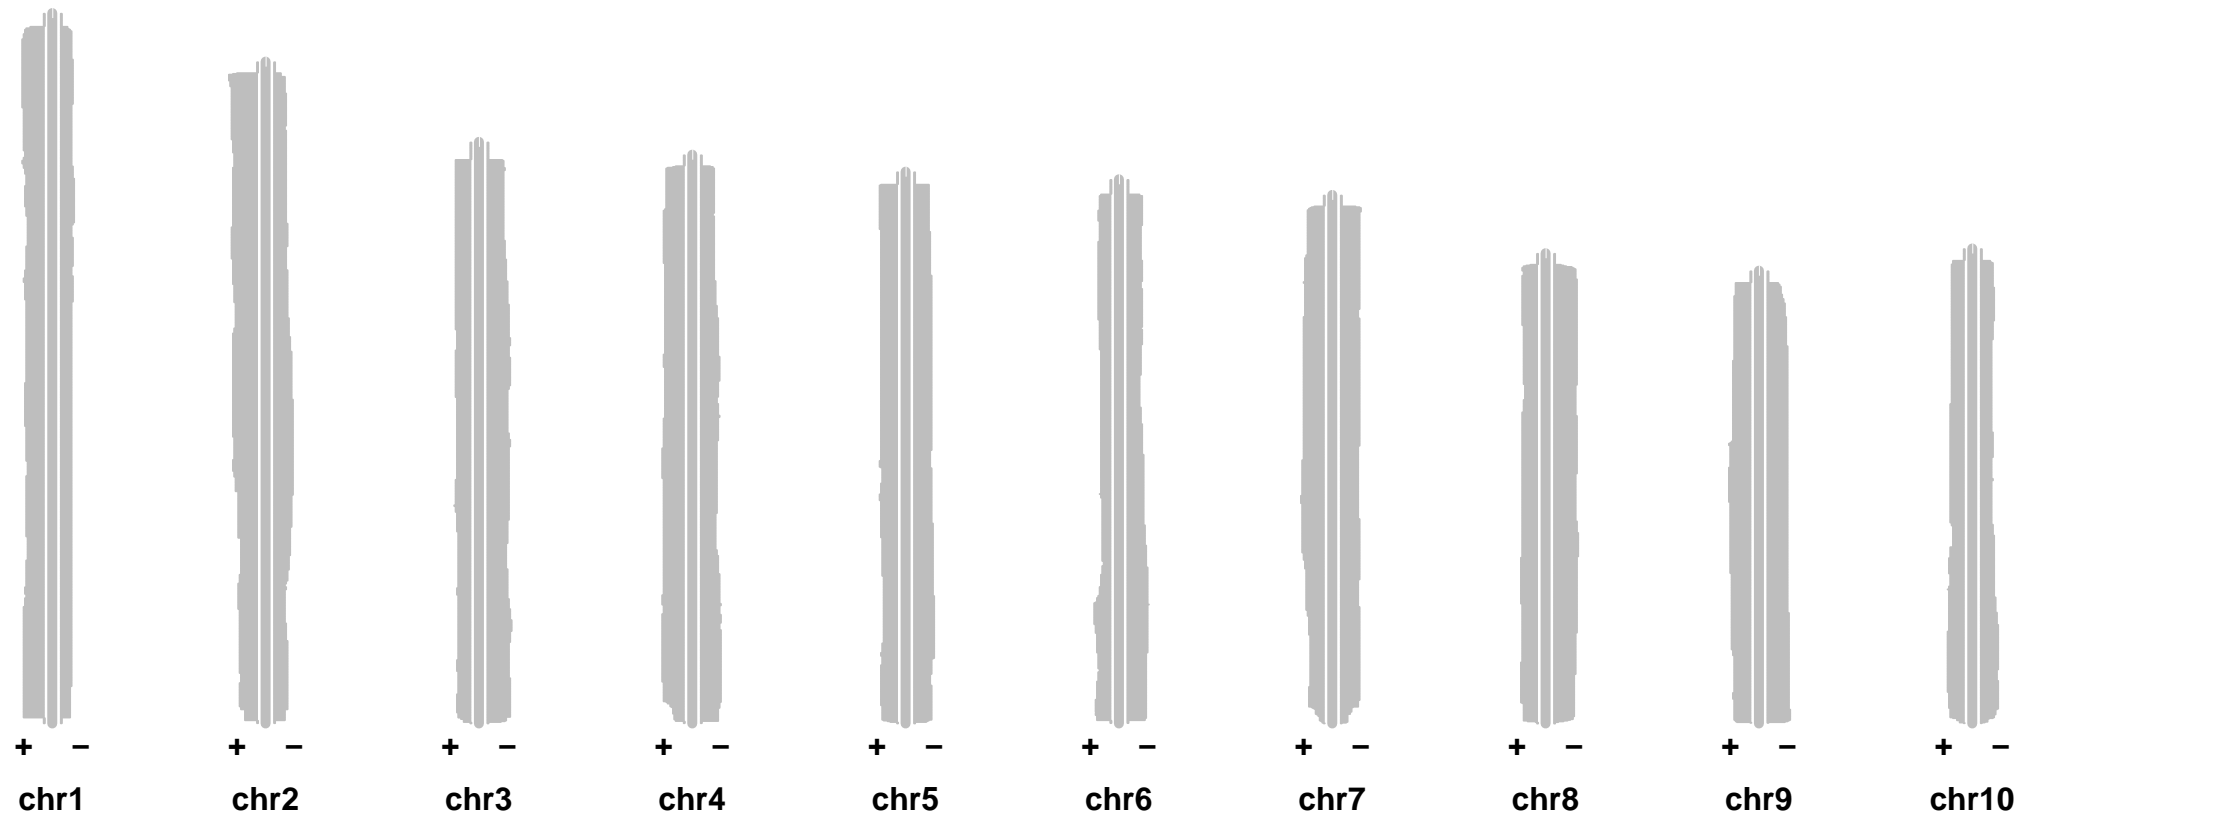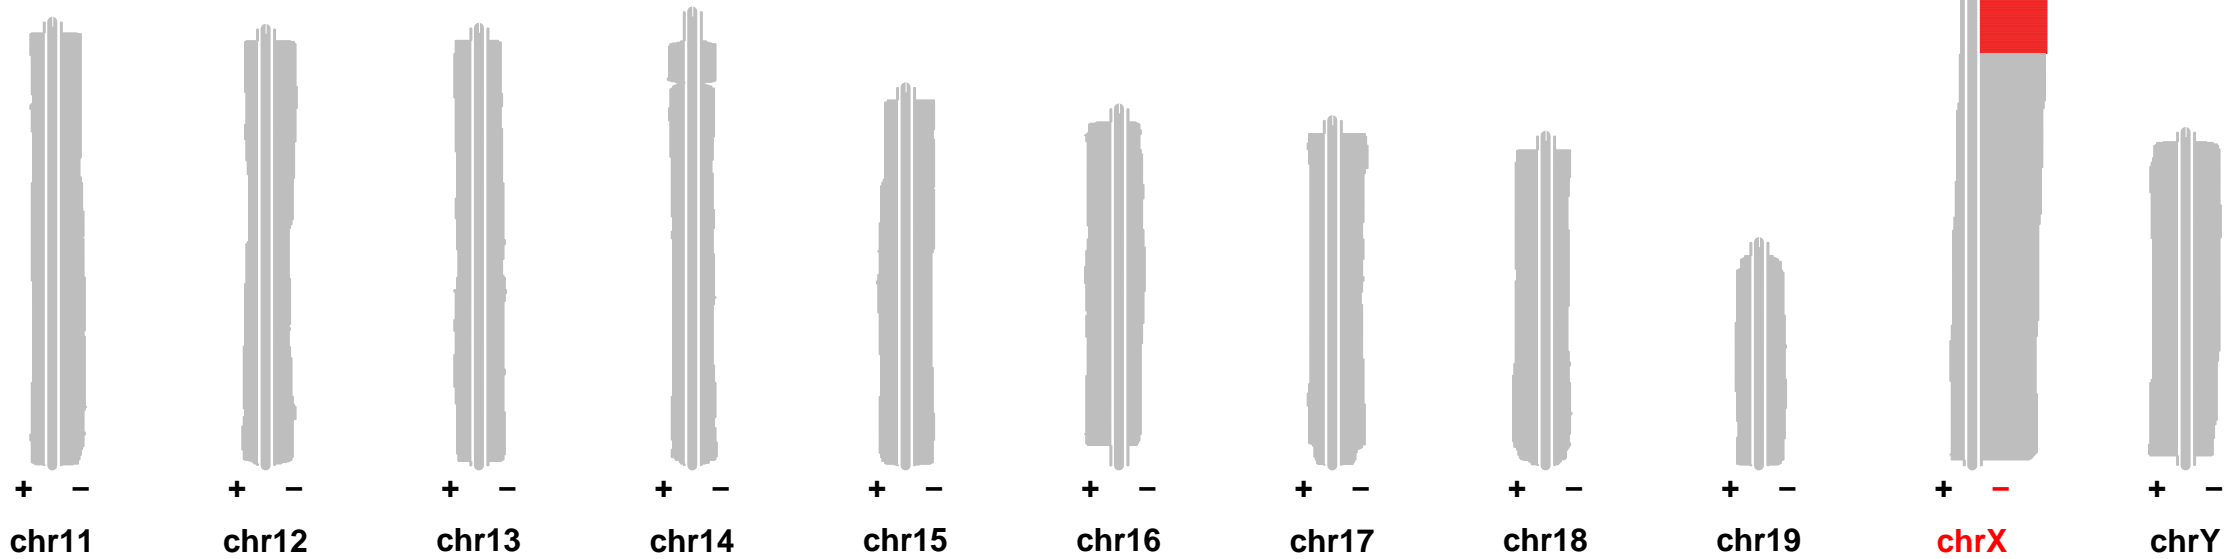

Quality filter=20

Fragment= chr1\_GL456210\_random Organism= Mus\_musculus

Peak agreement= 77.36 %

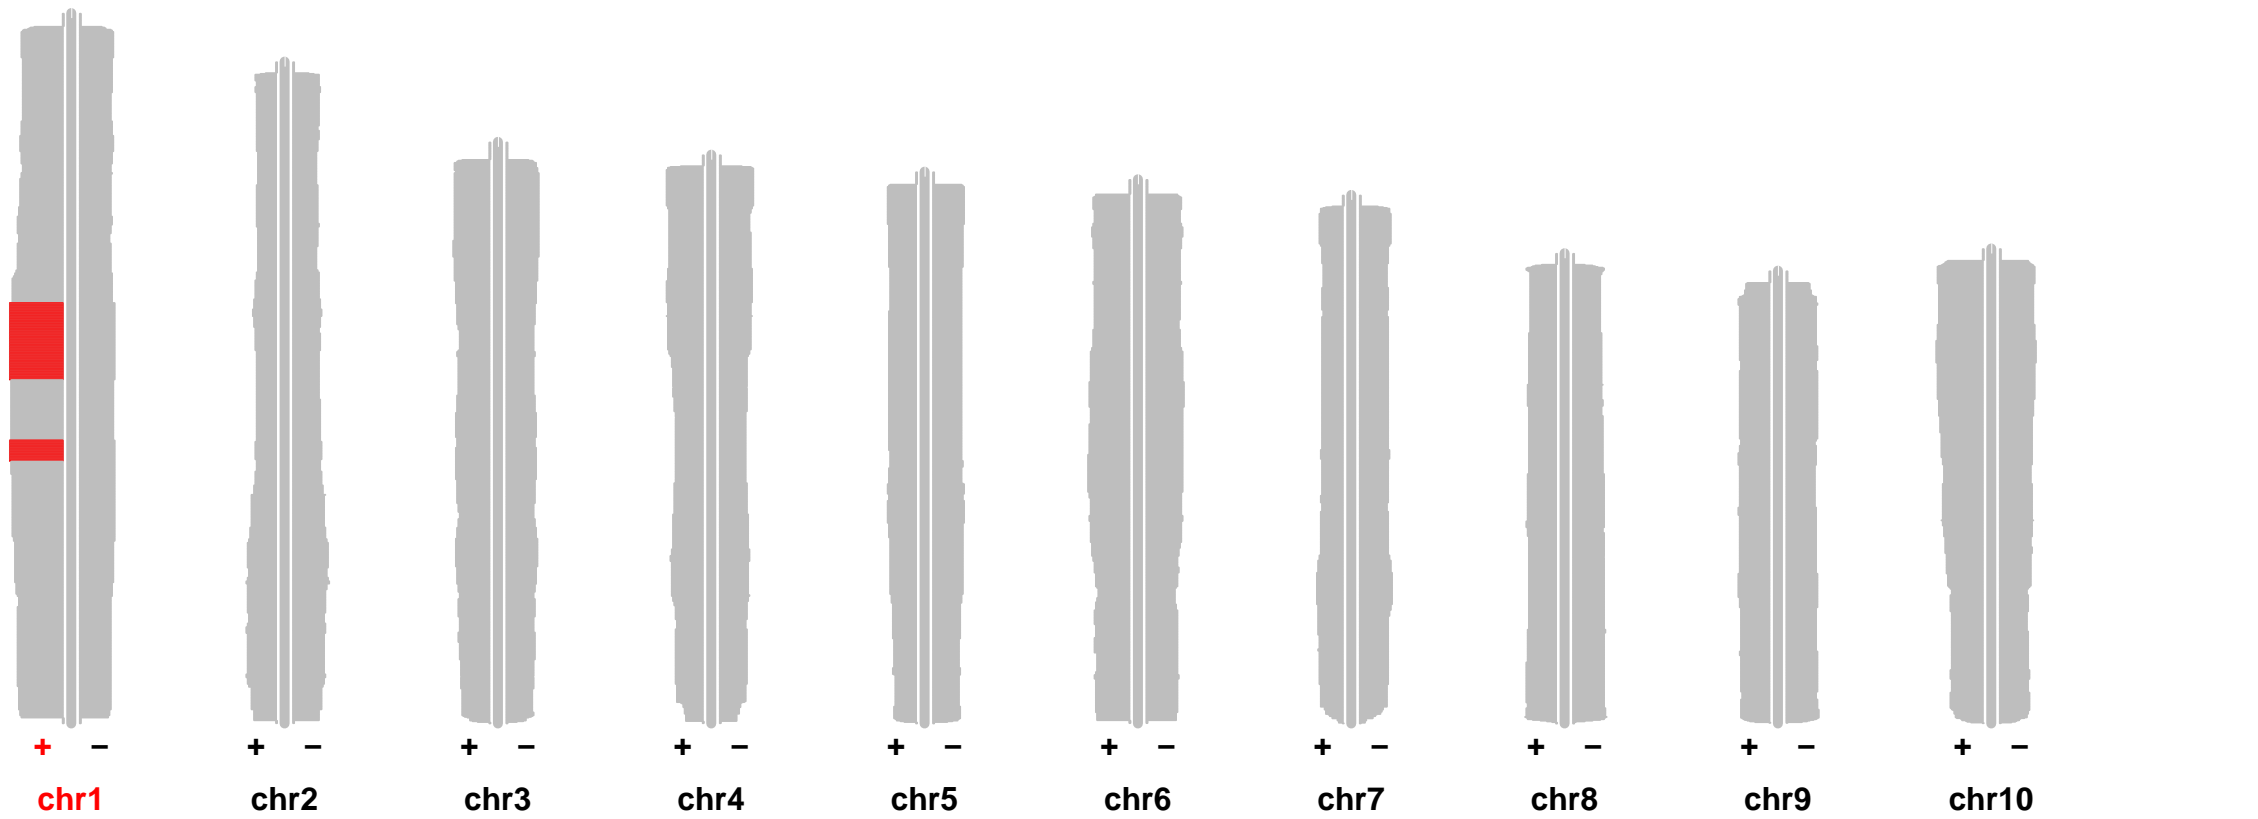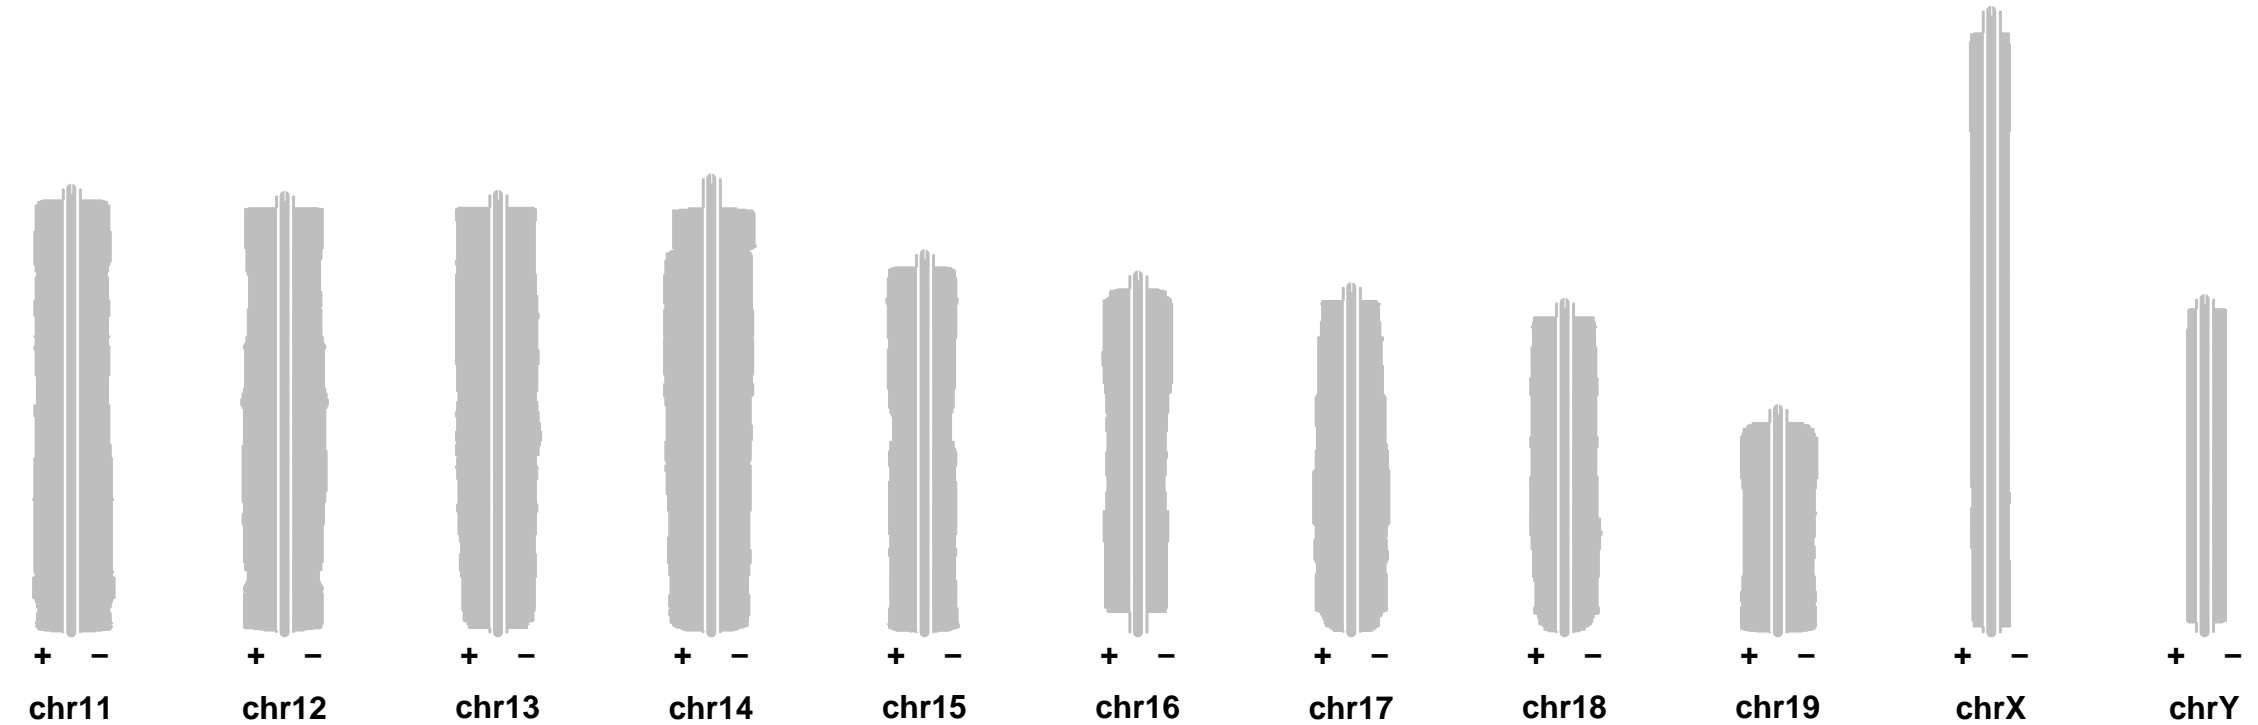

Quality filter=20

Fragment= chr1\_GL456211\_random Organism= Mus\_musculus

Peak agreement= 63.16 %

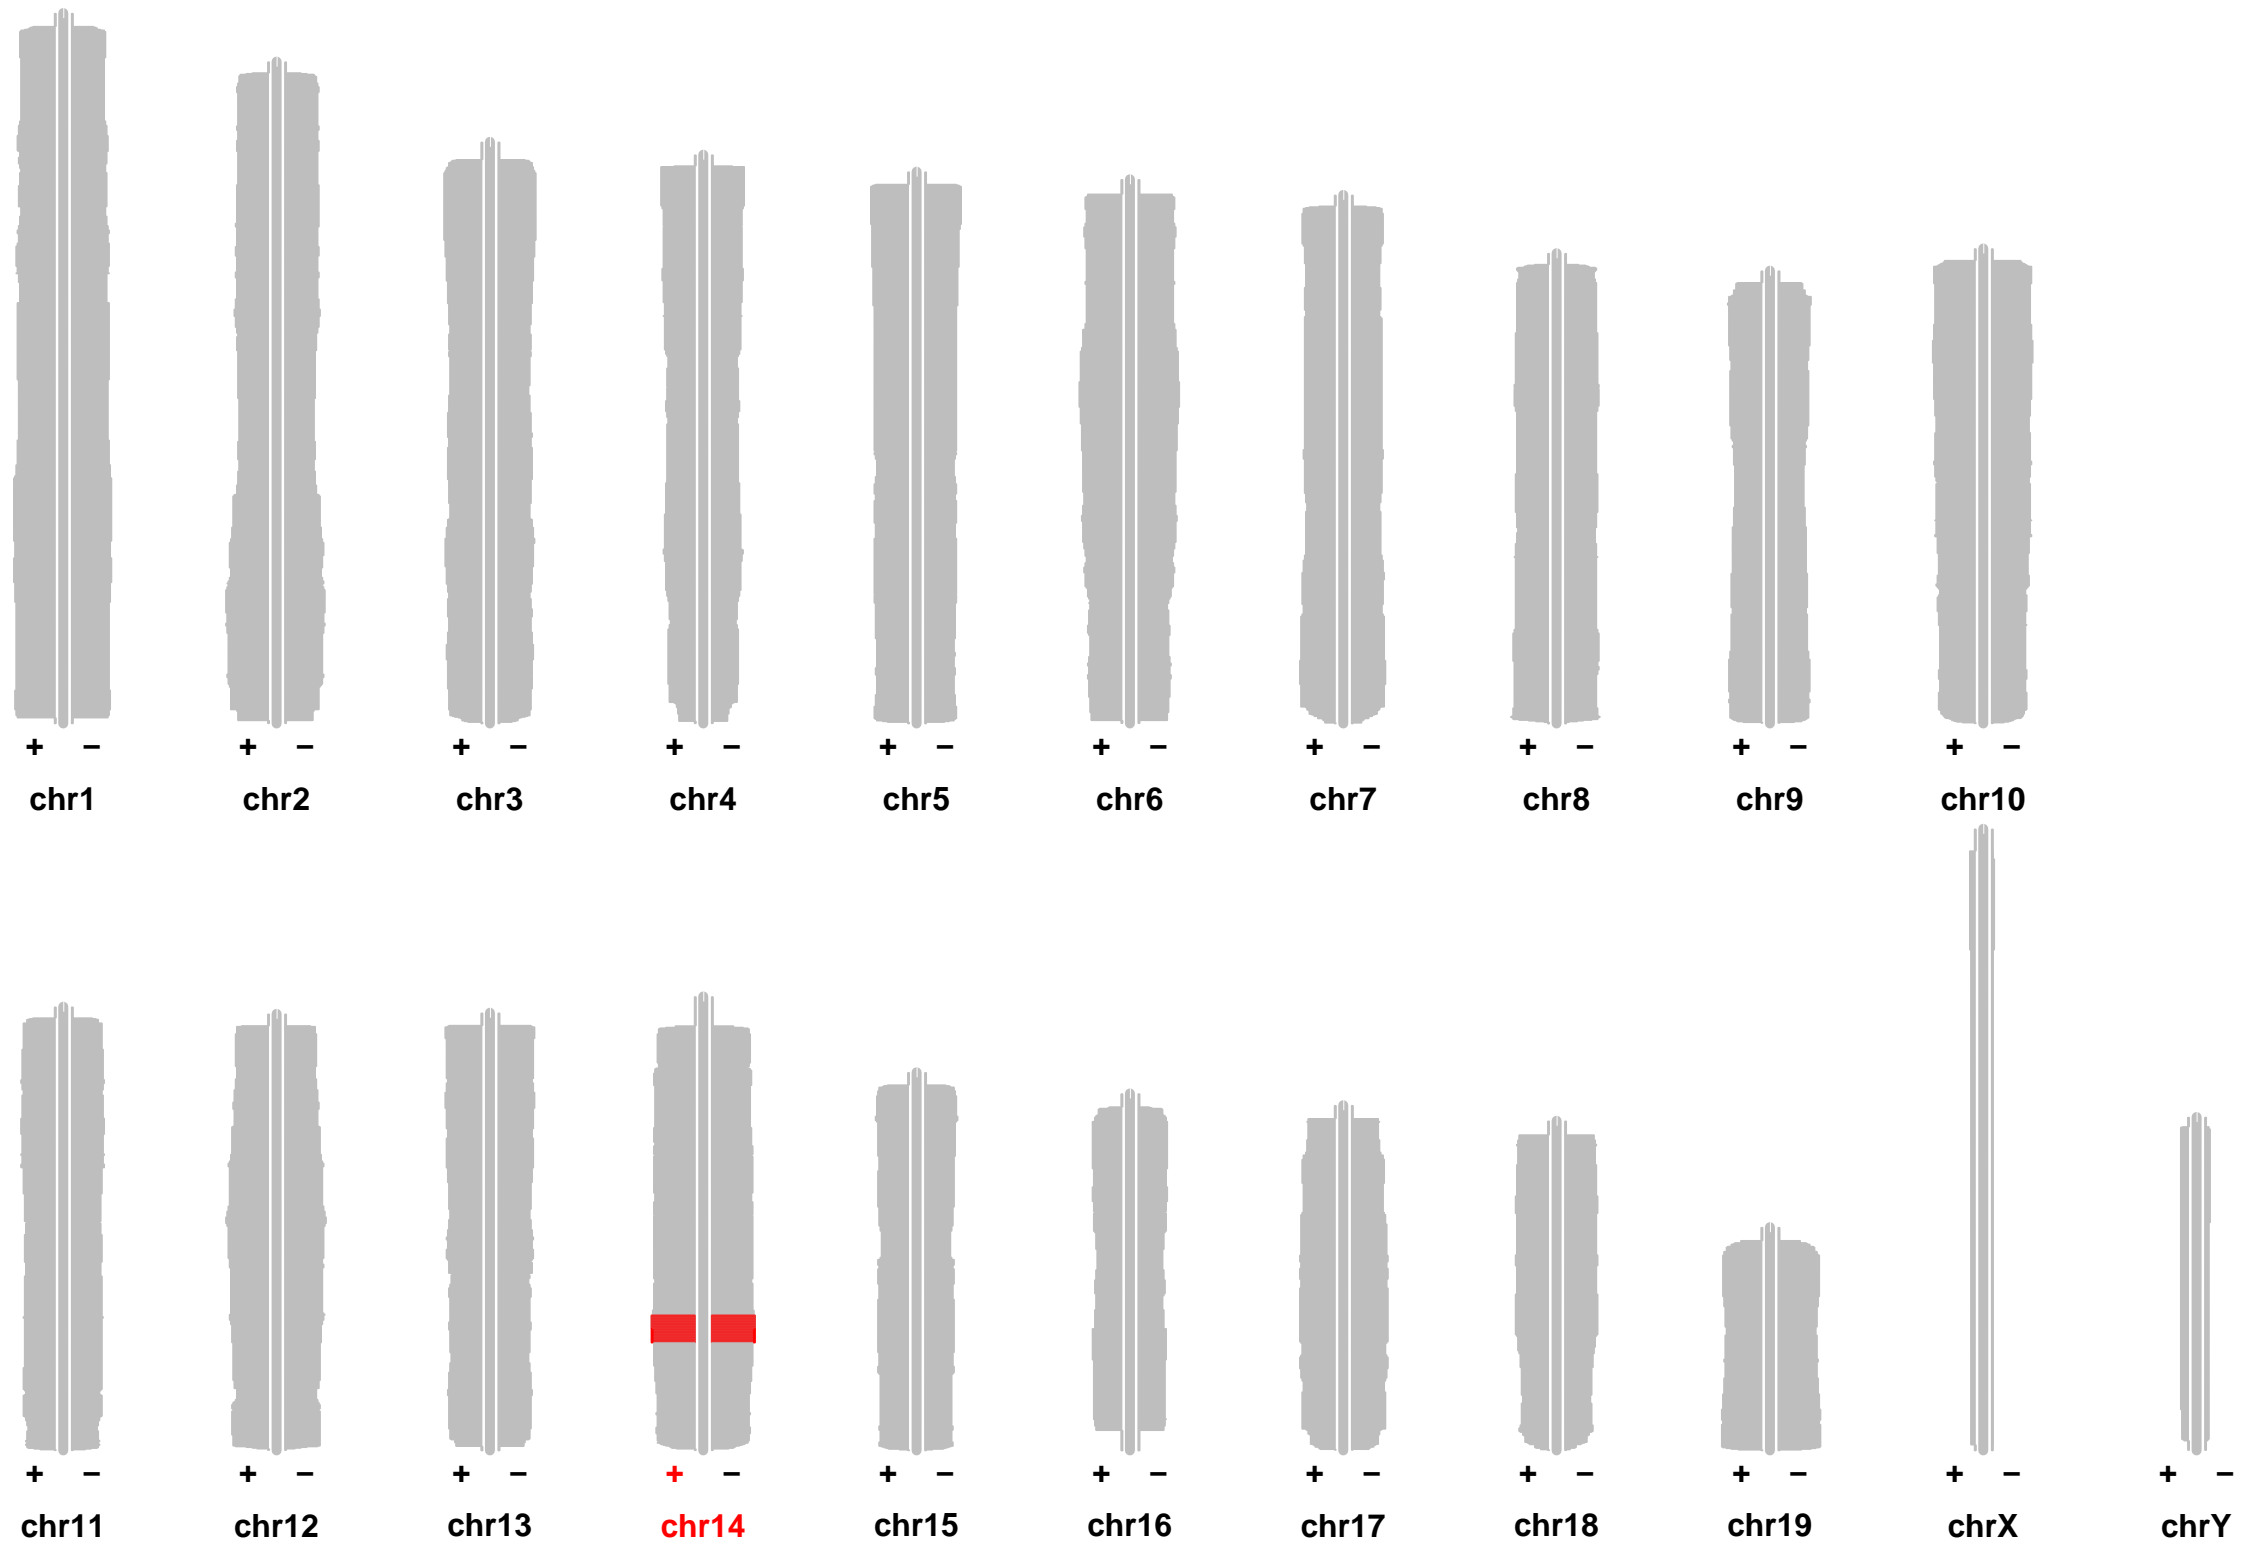

Quality filter=20

Fragment= chr1\_GL456212\_random Organism= Mus\_musculus

Peak agreement= 64.81 %

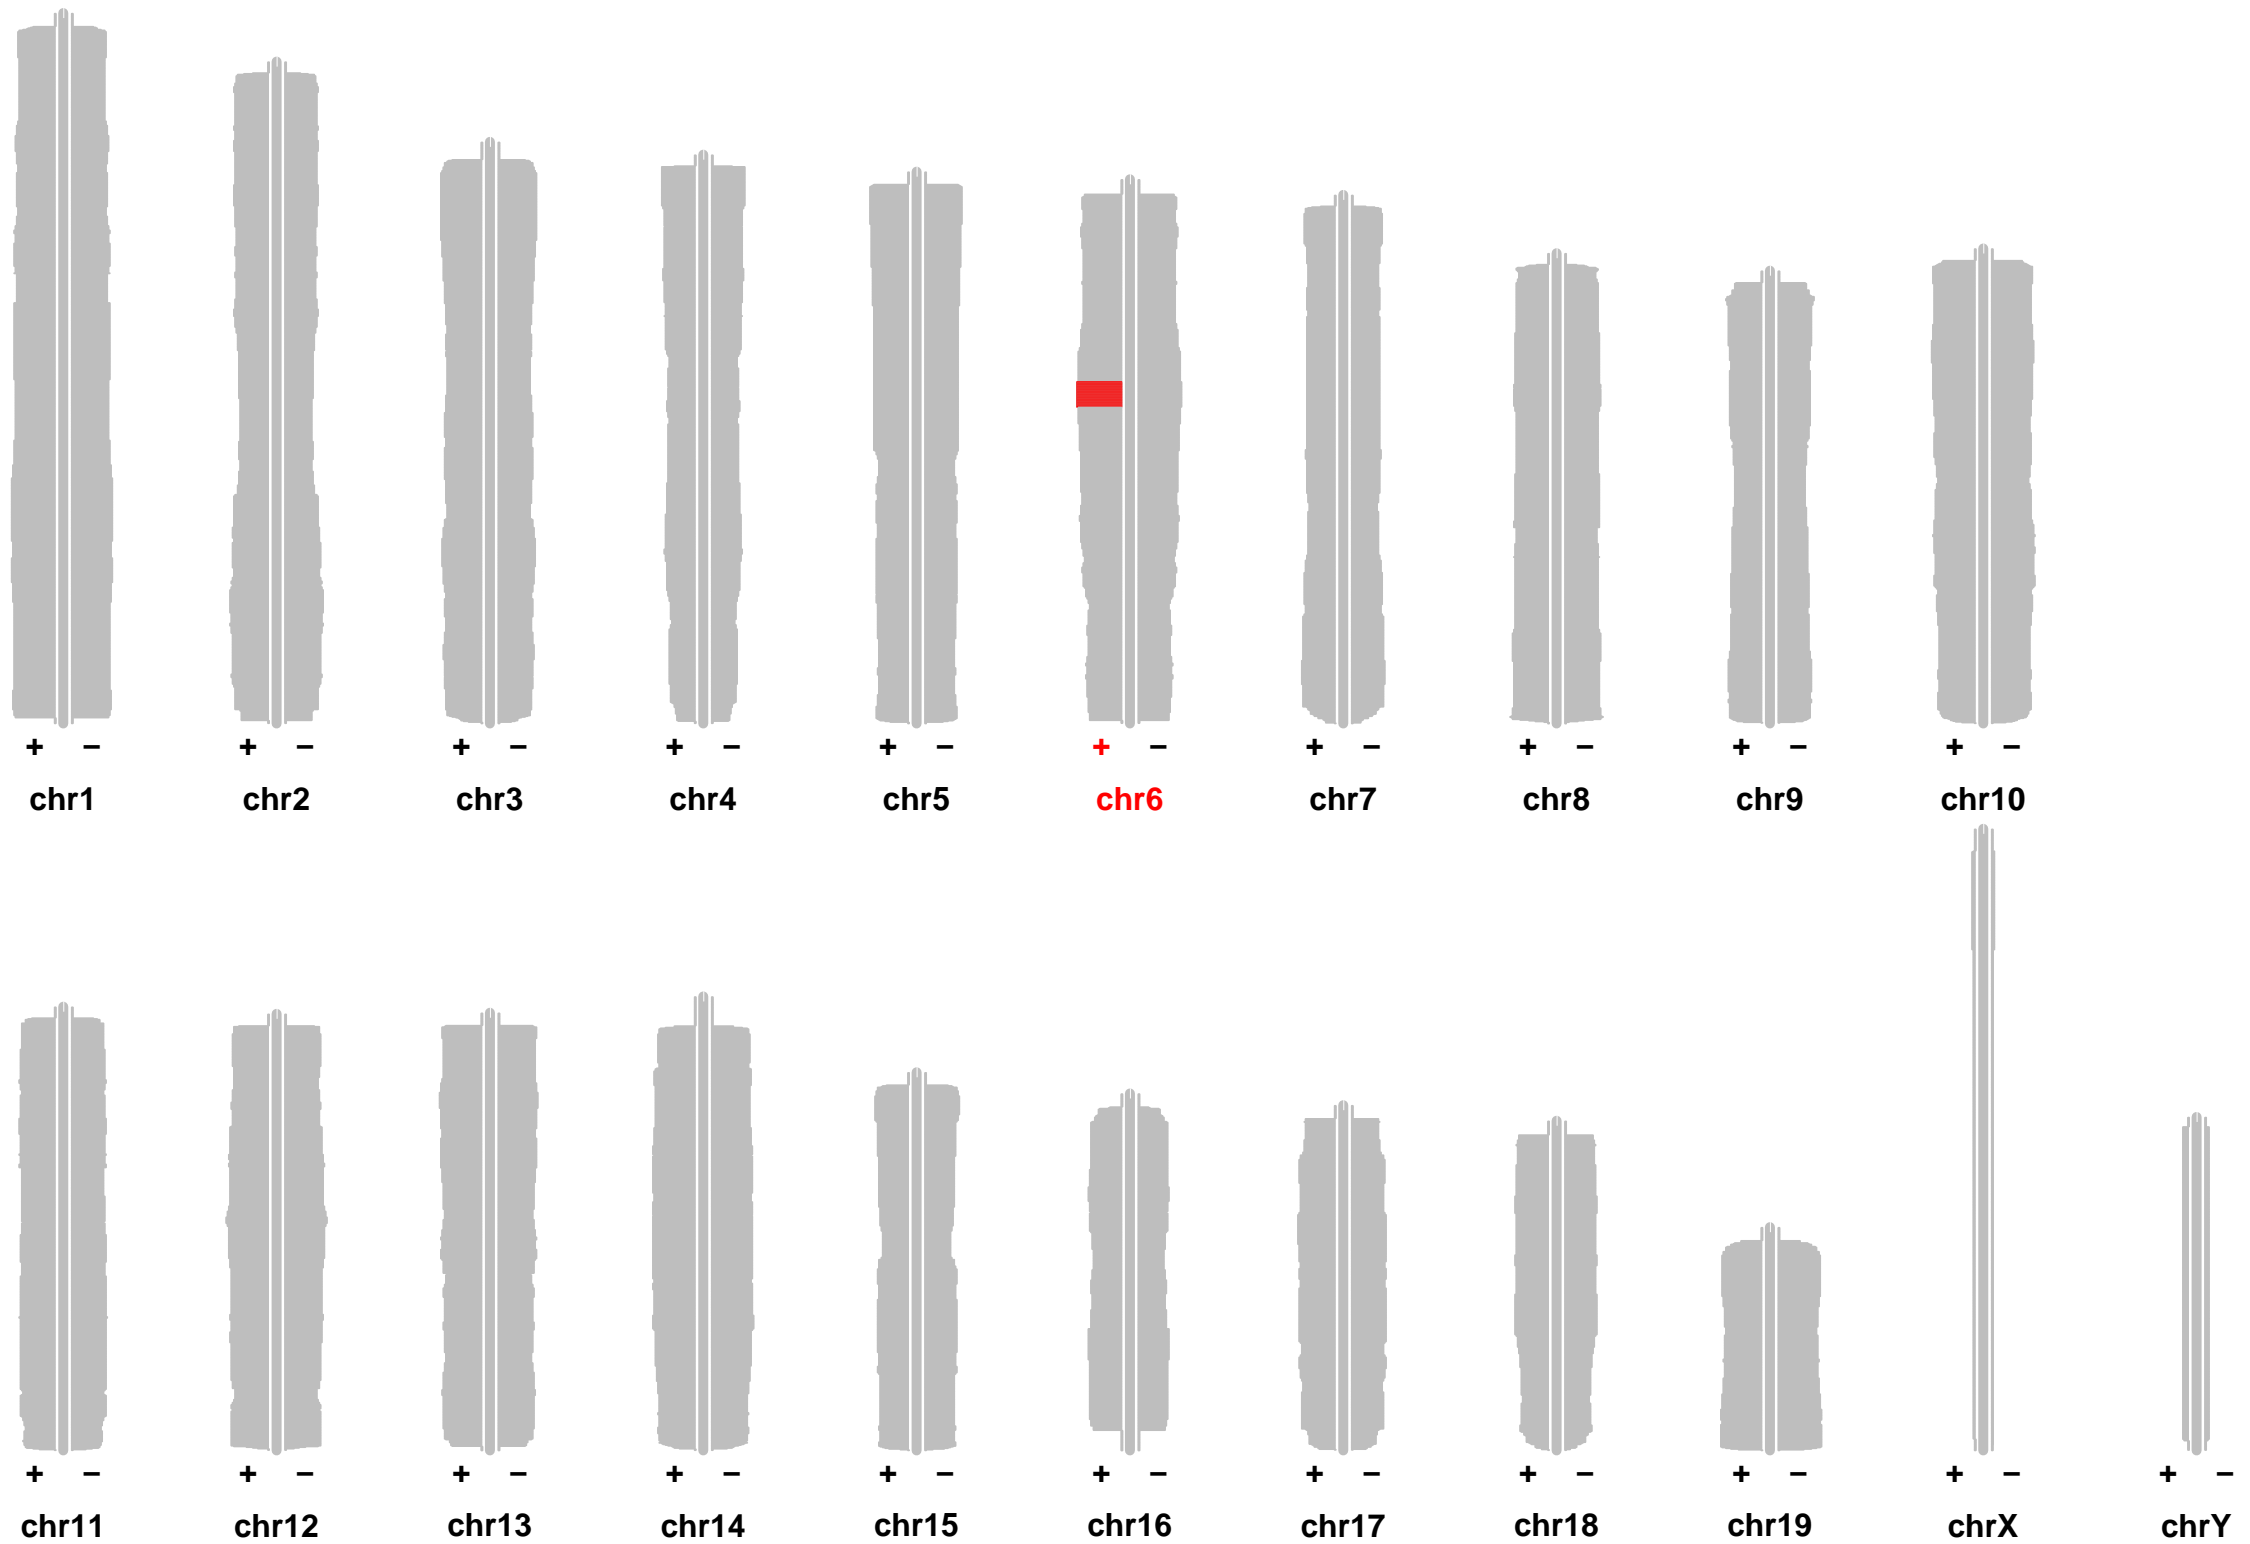

Quality filter=20



Fragment= chr1\_GL456221\_random Organism= Mus\_musculus

Peak agreement= 78.57 %

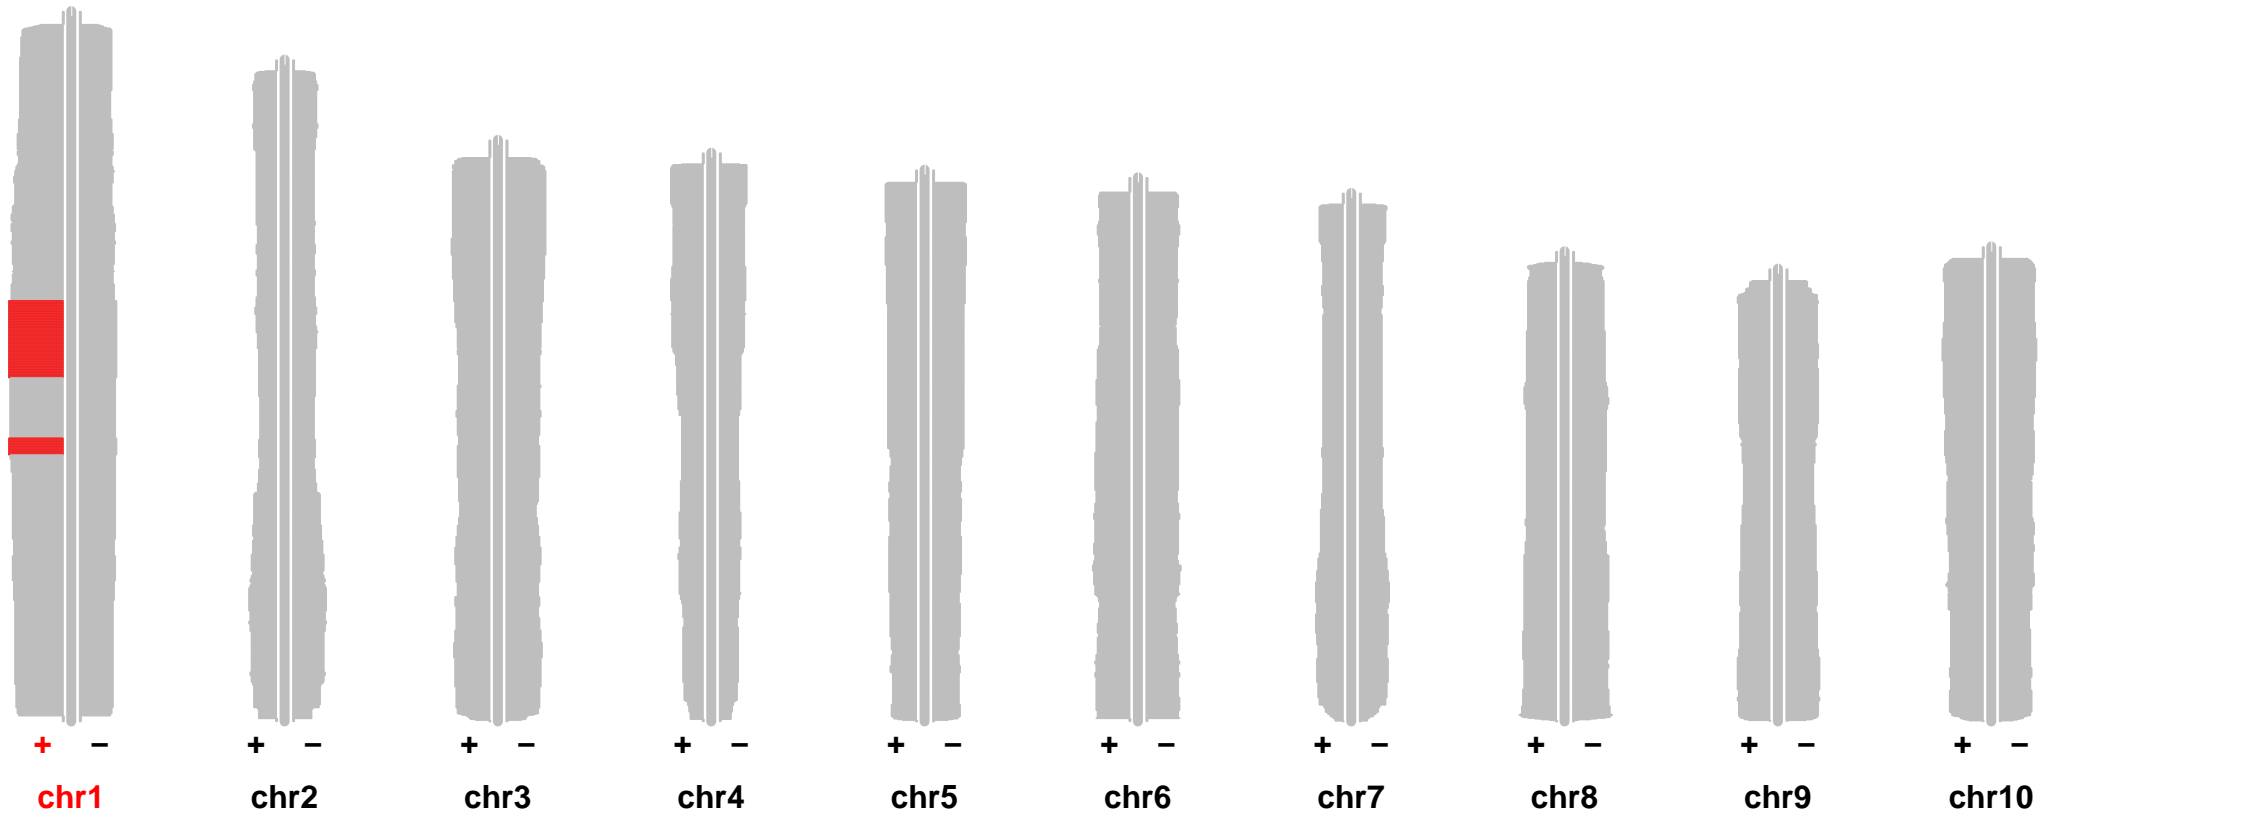

+ -  
chr1

+ -  
chr2

+ -  
chr3

+ -  
chr4

+ -  
chr5

+ -  
chr6

+ -  
chr7

+ -  
chr8

+ -  
chr9

+ -  
chr10

+ -  
chr11

+ -  
chr12

+ -  
chr13

+ -  
chr14

+ -  
chr15

+ -  
chr16

+ -  
chr17

+ -  
chr18

+ -  
chr19

+ -  
chrX

+ -  
chrY

Quality filter=20

Fragment= chr4\_JH584292\_random Organism= Mus\_musculus

Peak agreement= 72.55 %

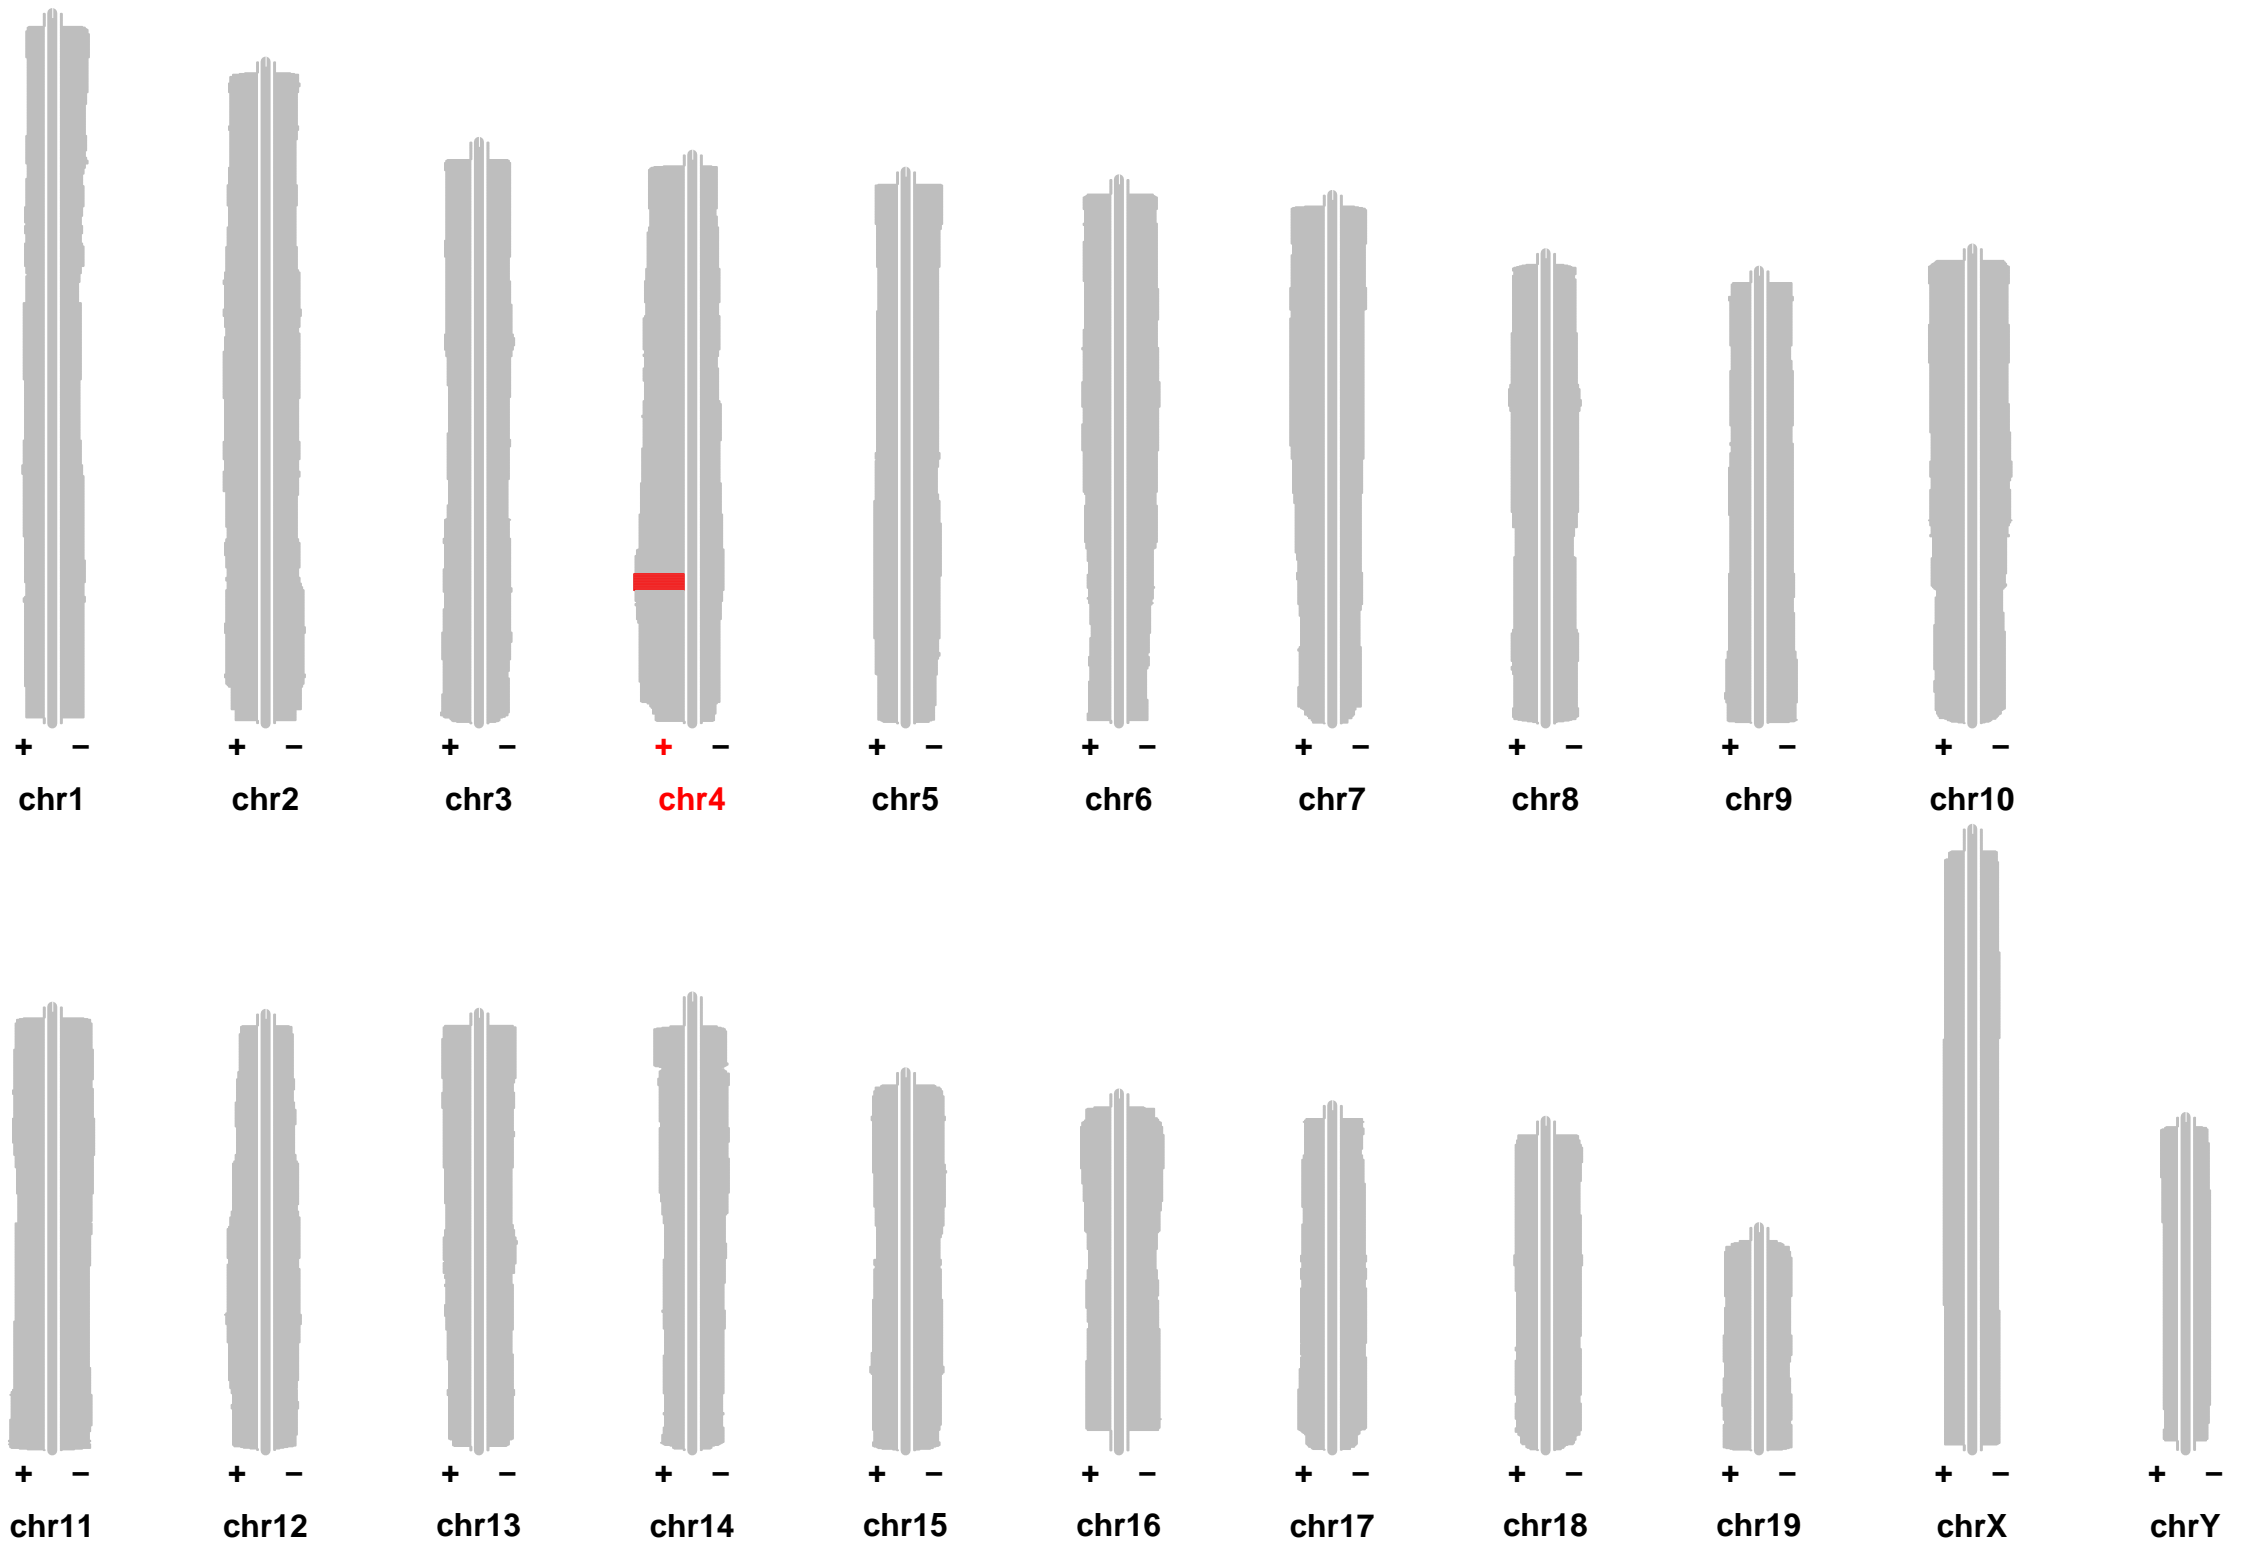

Quality filter=20

Fragment= chr5\_GL456354\_random Organism= Mus\_musculus

Peak agreement= 73.08 %

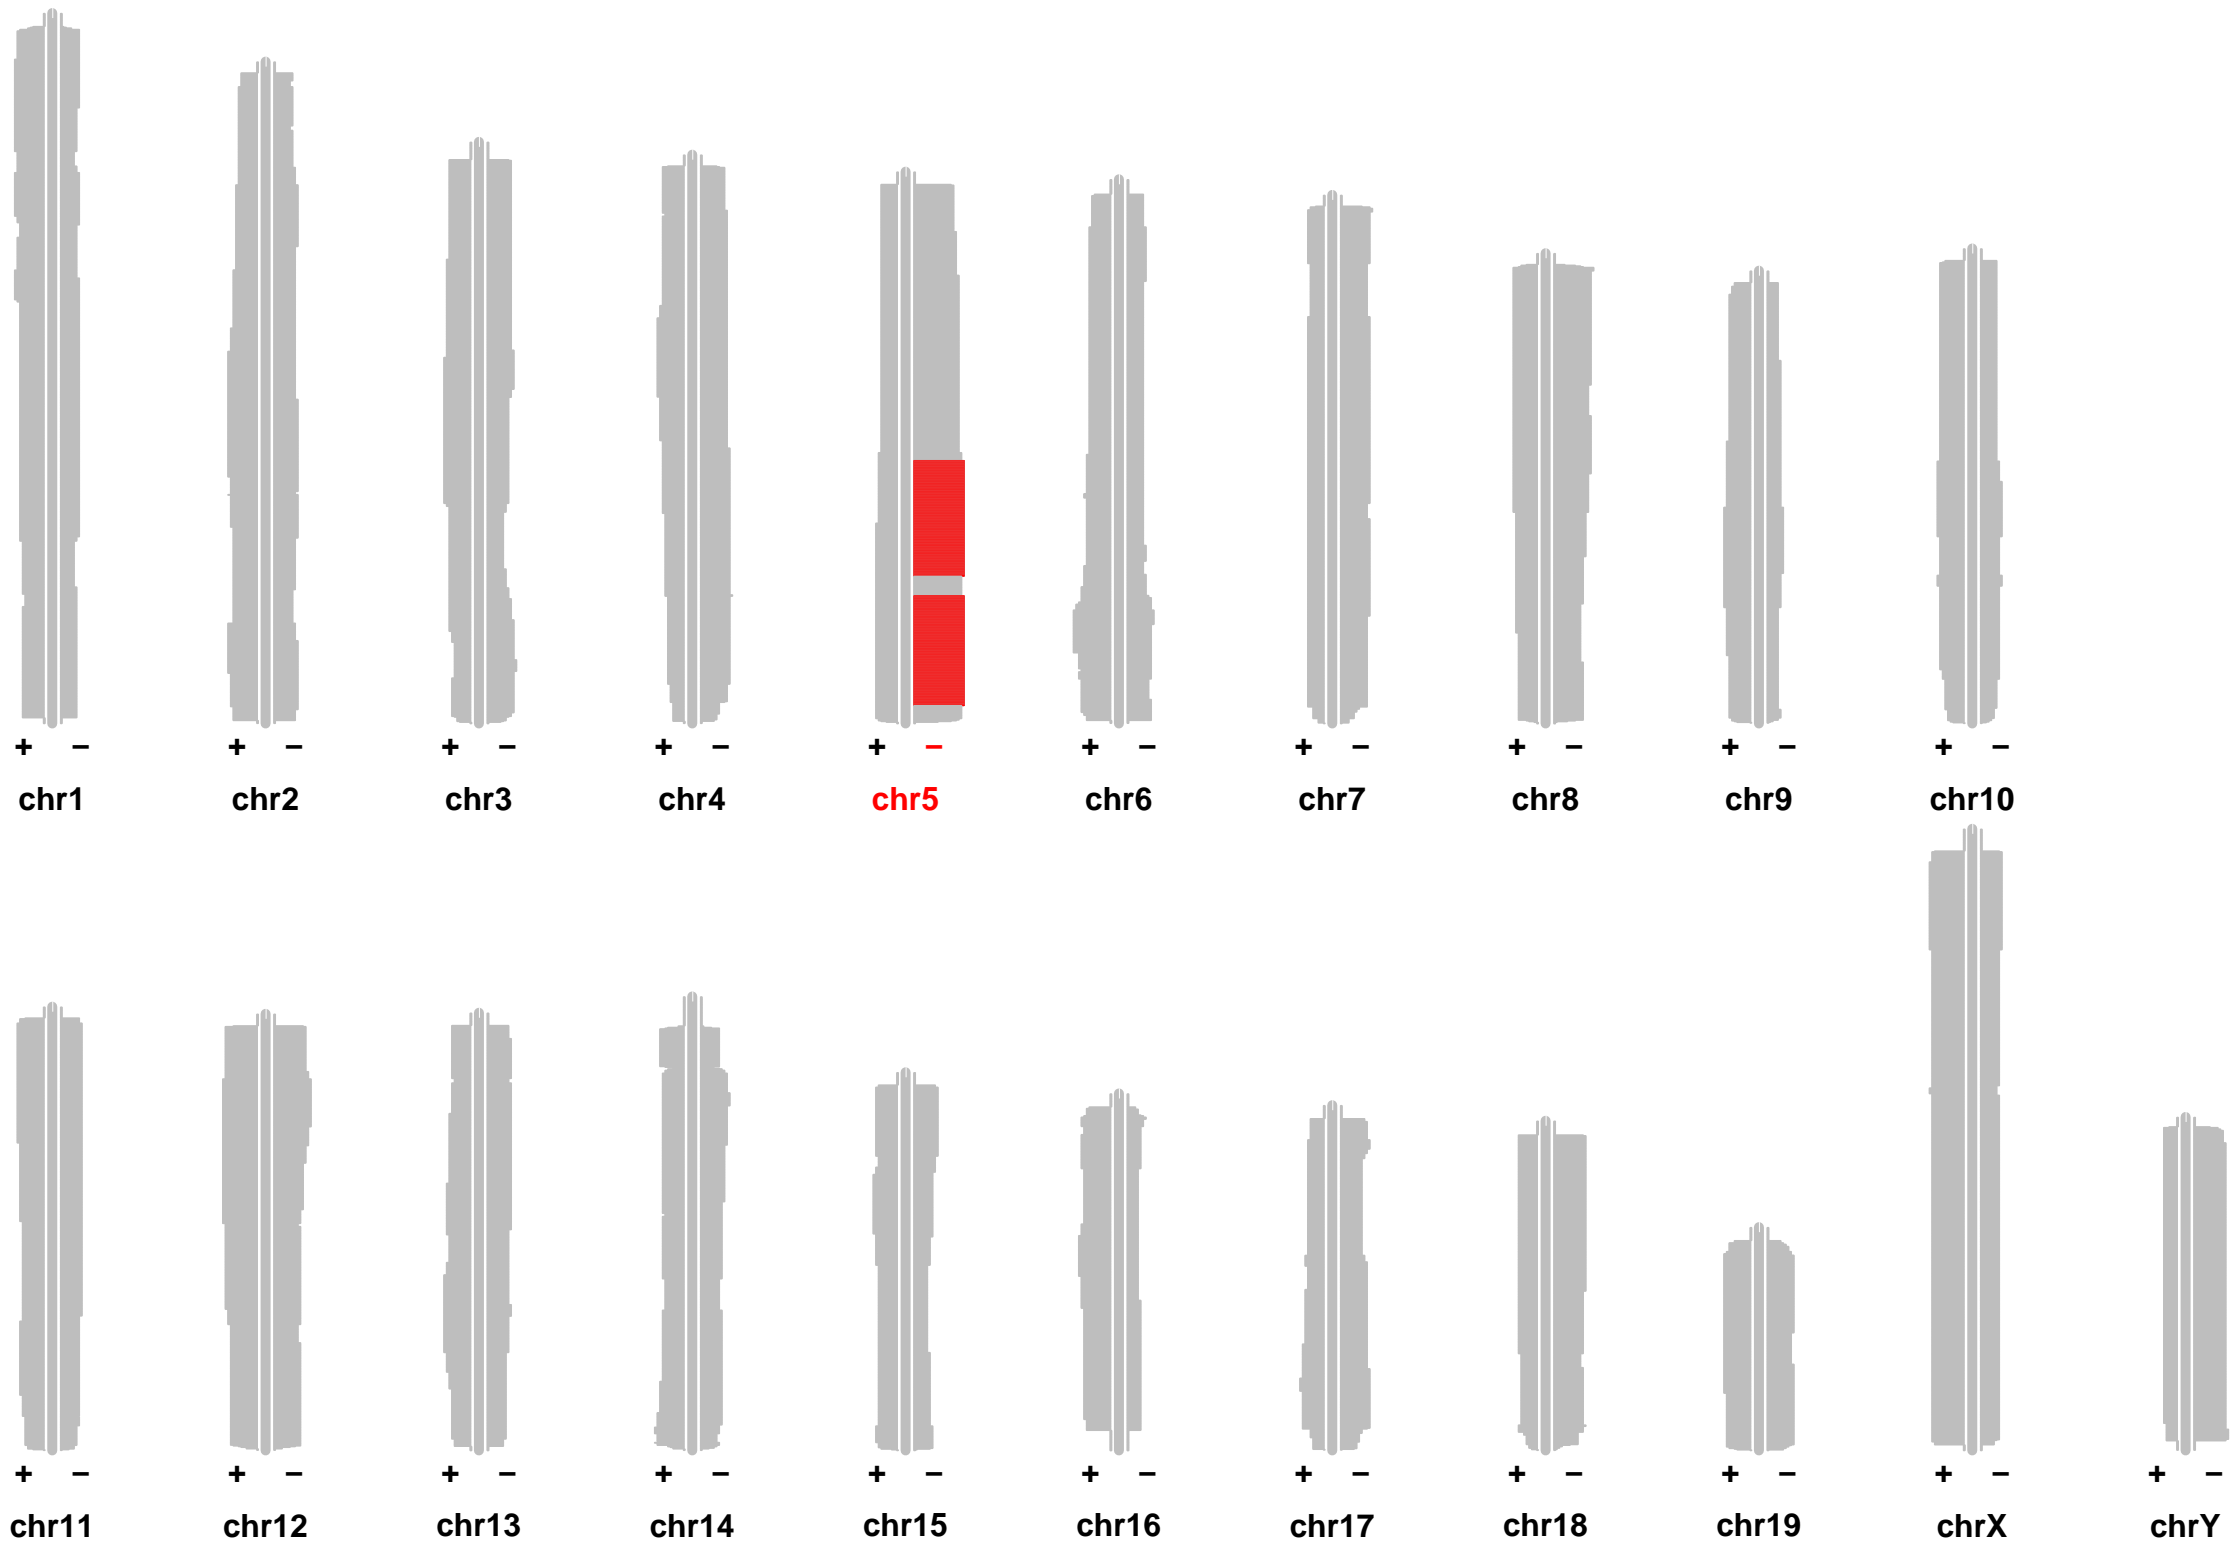

Quality filter=20

Fragment= chr5\_JH584296\_random Organism= Mus\_musculus

Peak agreement= 80 %

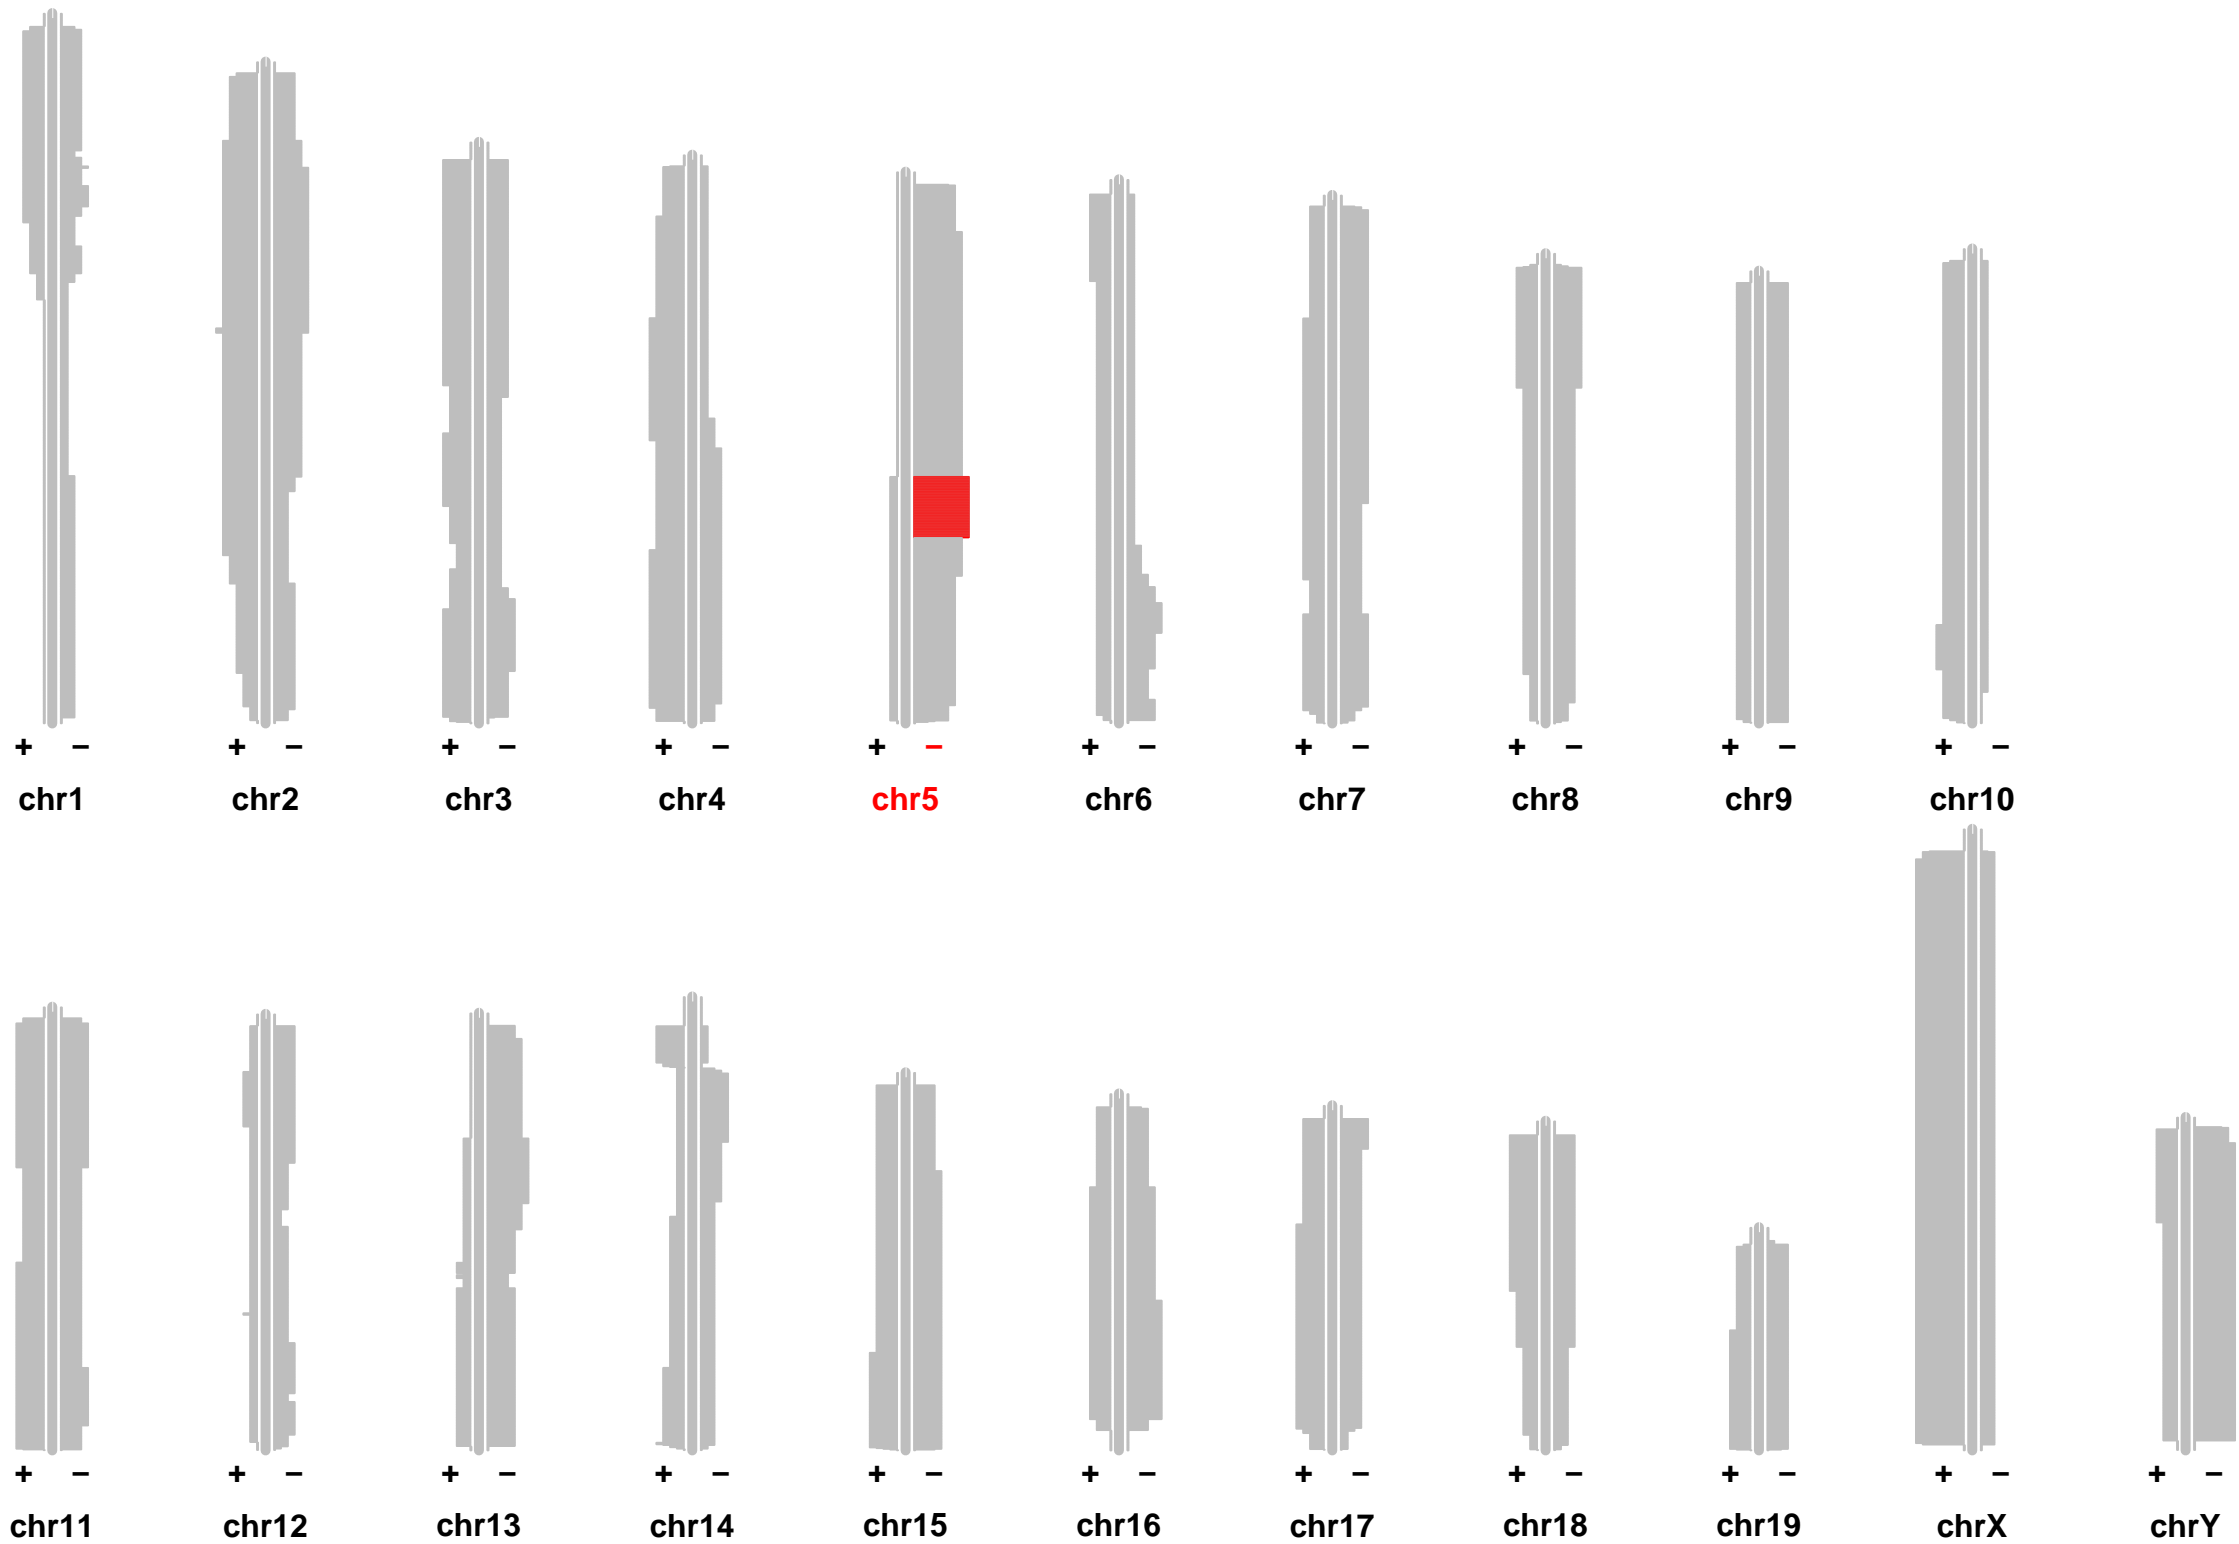

Quality filter=20

Fragment= chr5\_JH584297\_random Organism= Mus\_musculus

Peak agreement= 100 %

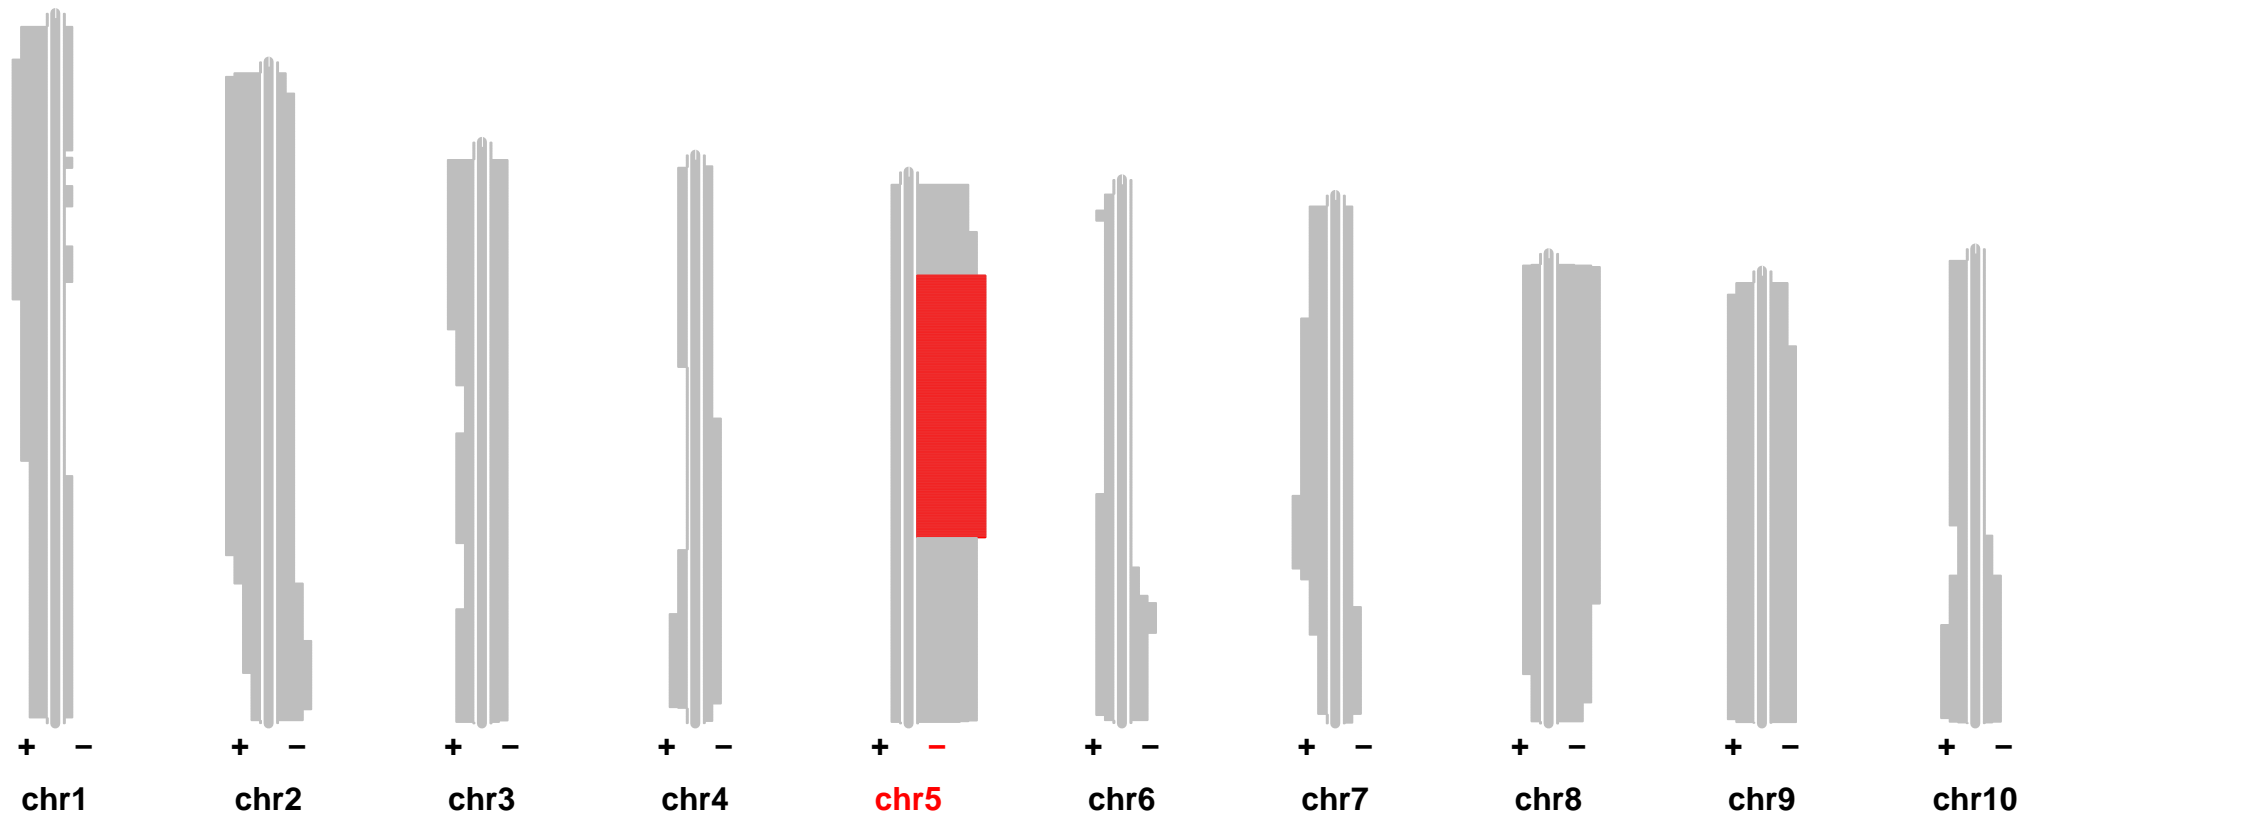

Quality filter=20

Fragment= chr5\_JH584299\_random Organism= Mus\_musculus

Peak agreement= 88.24 %

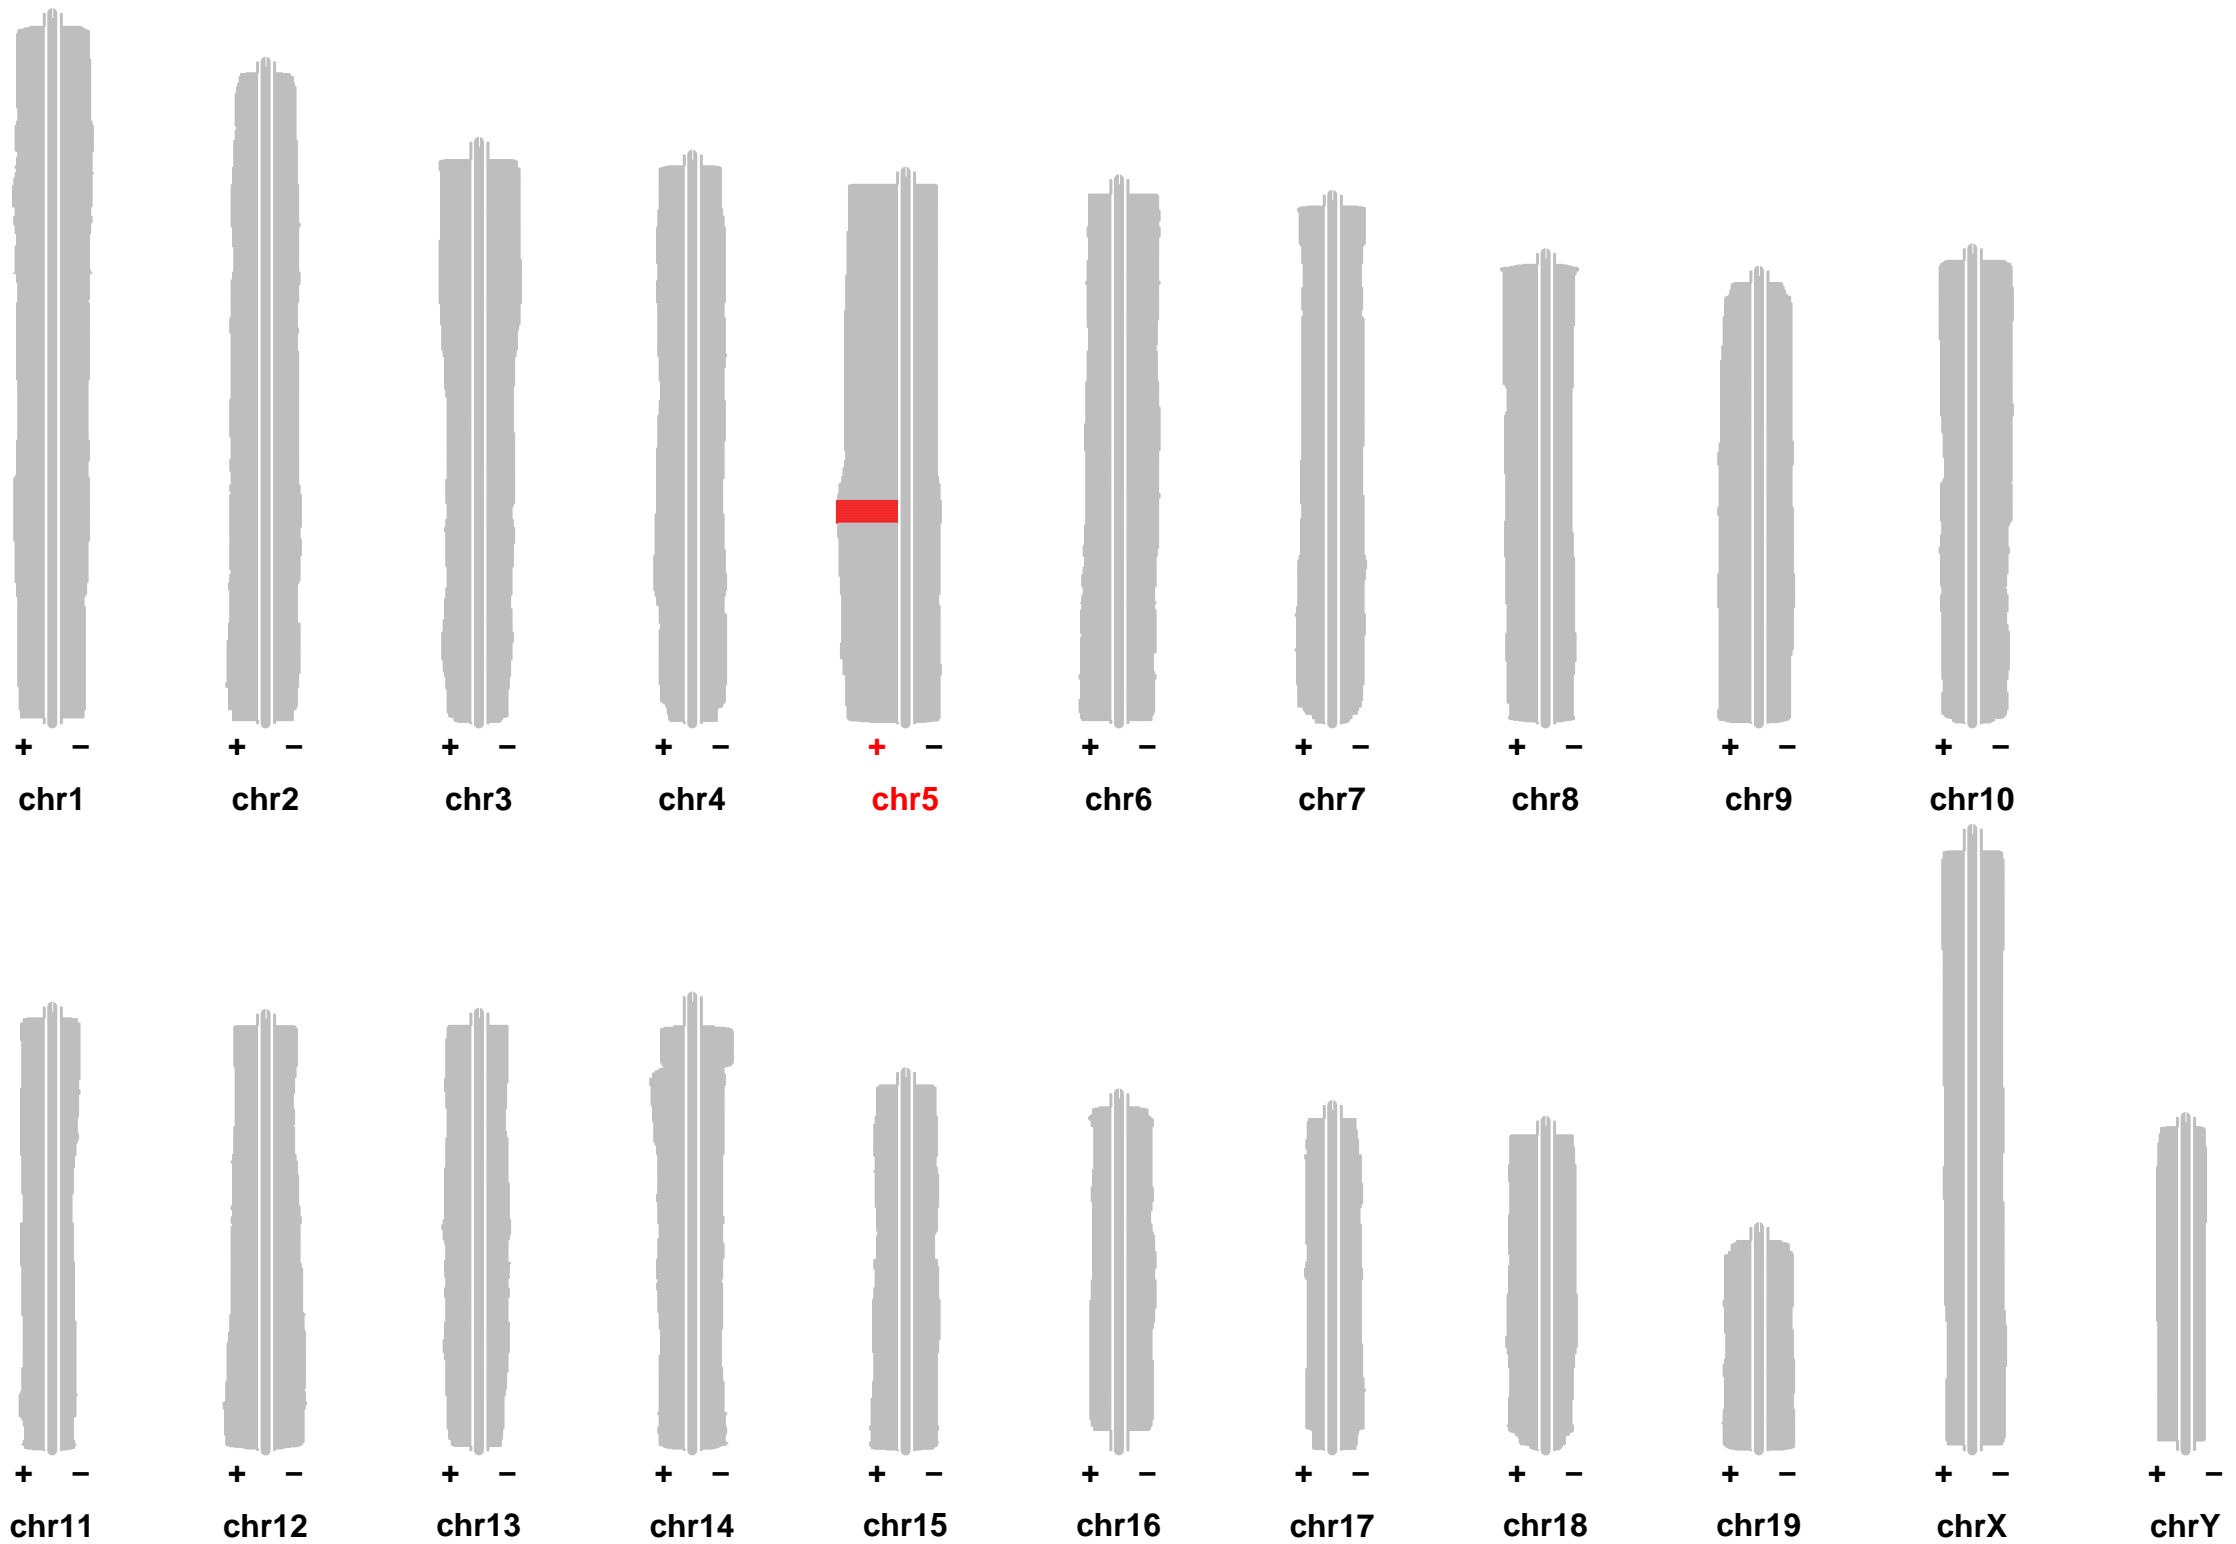

Quality filter=20

Fragment= chr4\_GL456216\_random Organism= Mus\_musculus

Peak agreement= 78 %

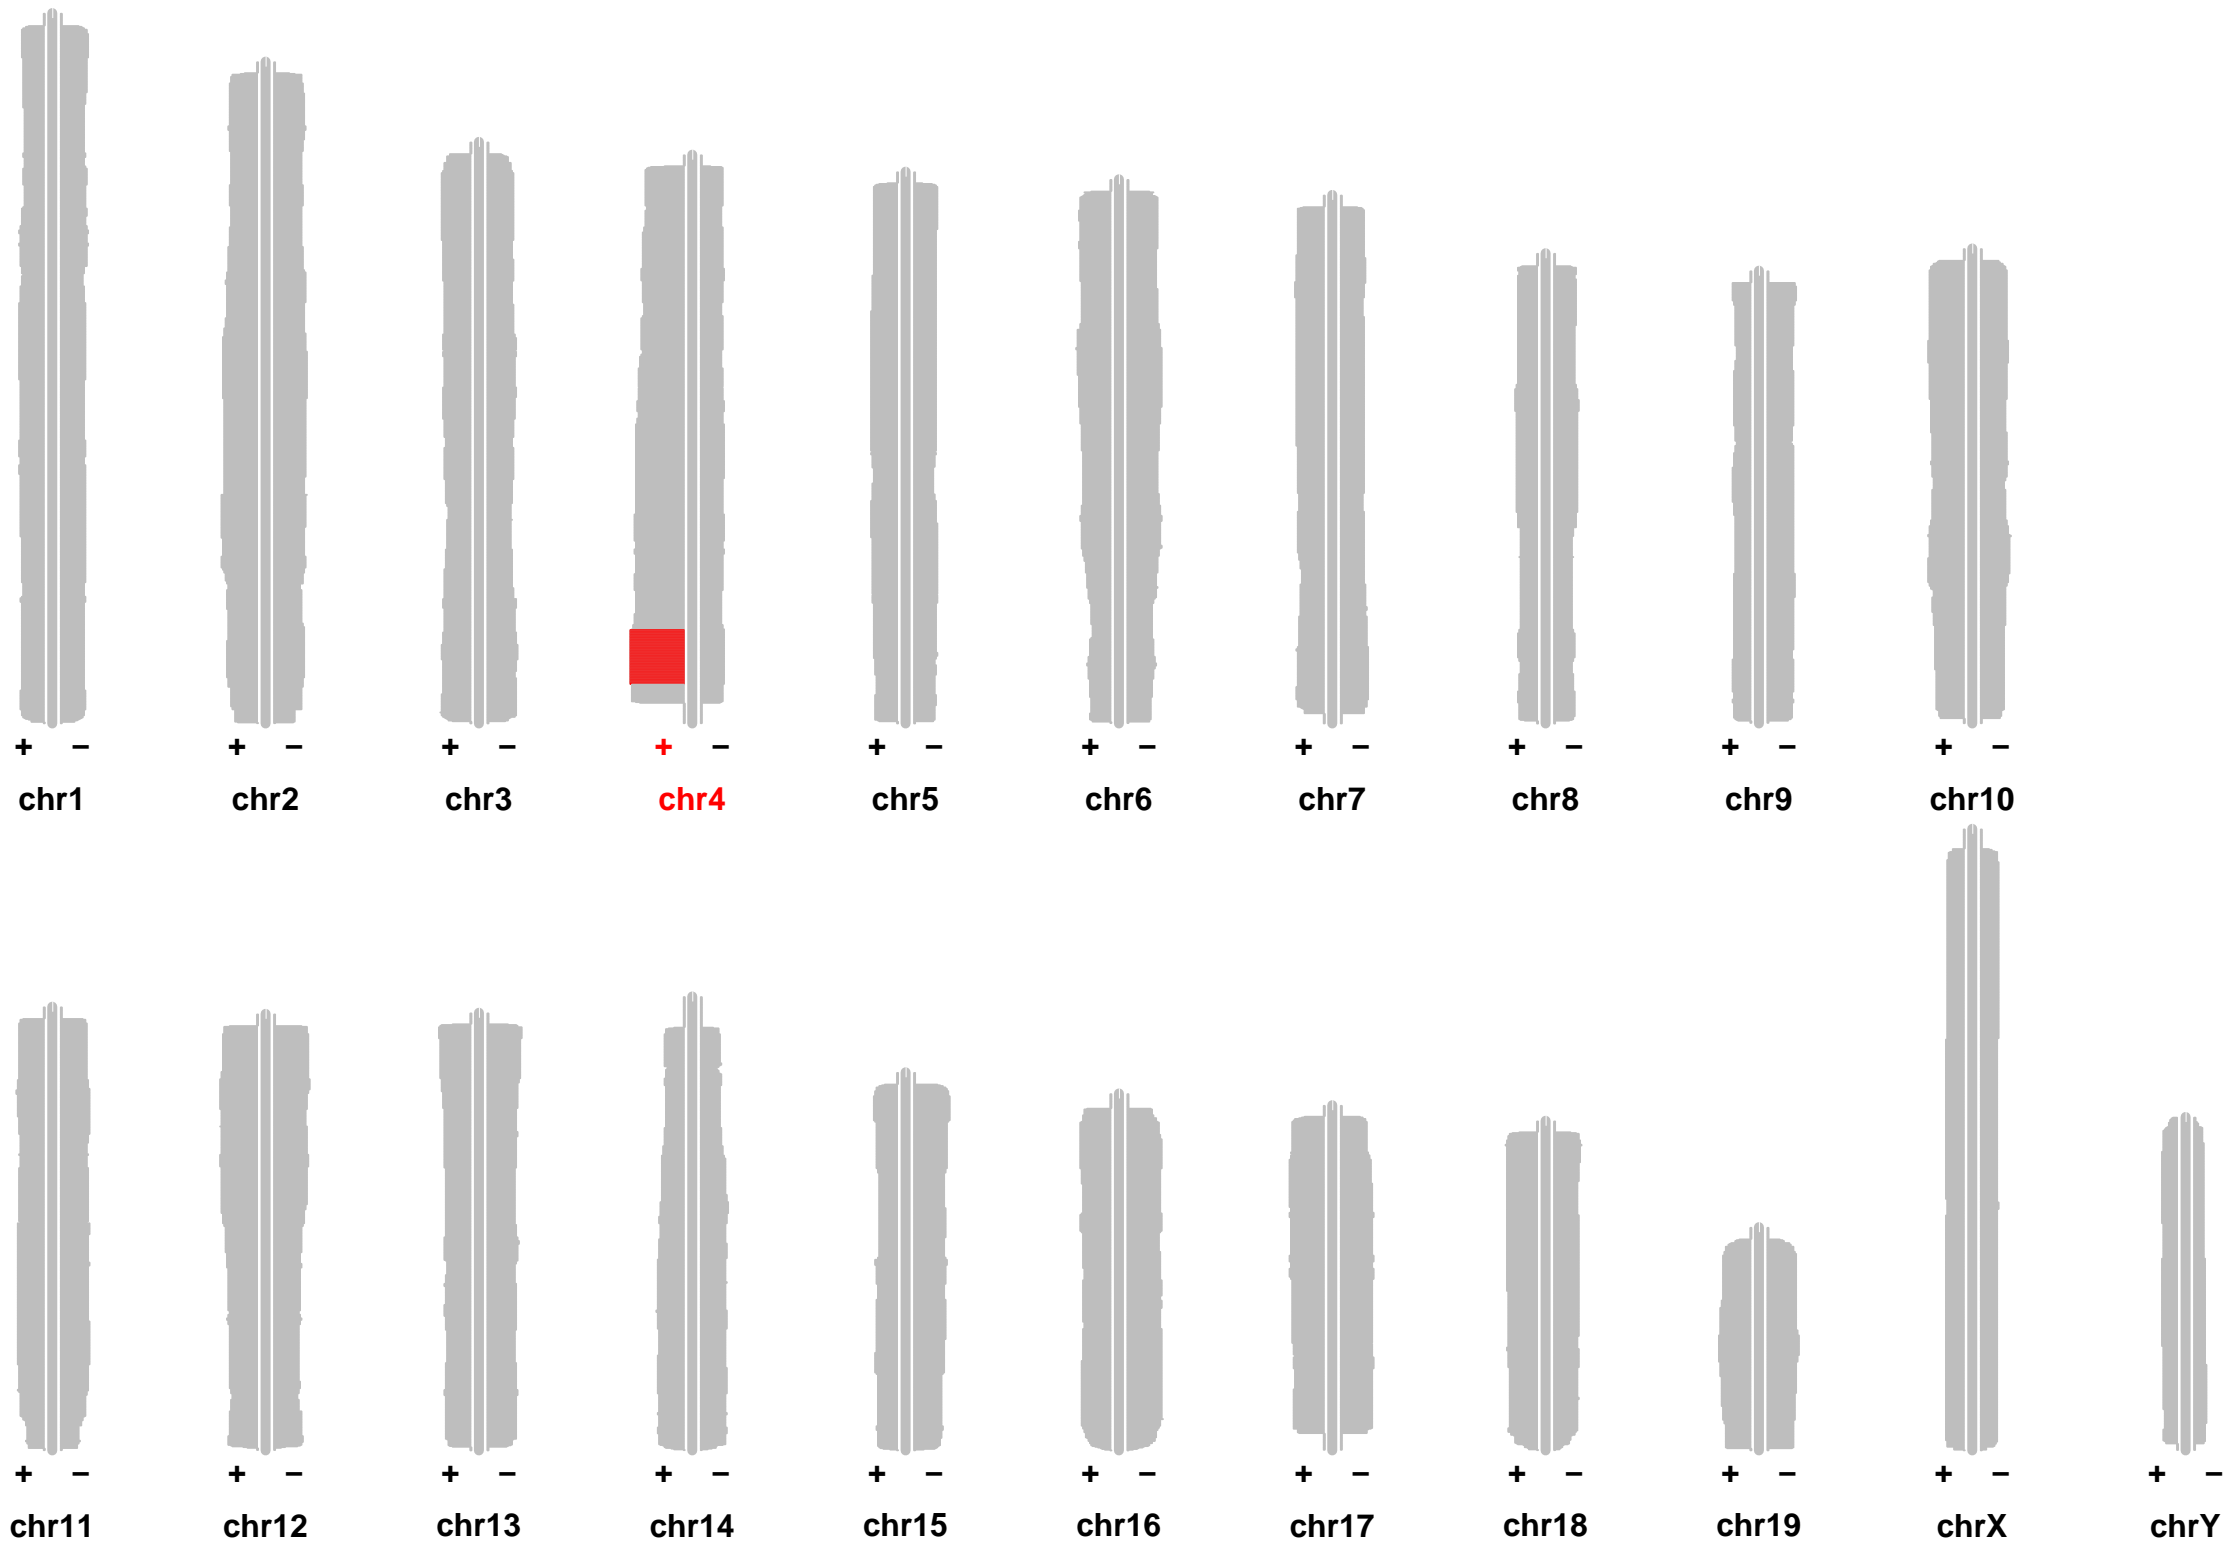

Quality filter=20

Fragment= chrUn\_GL456383 Organism= Mus\_musculus

Peak agreement= 81.82 %

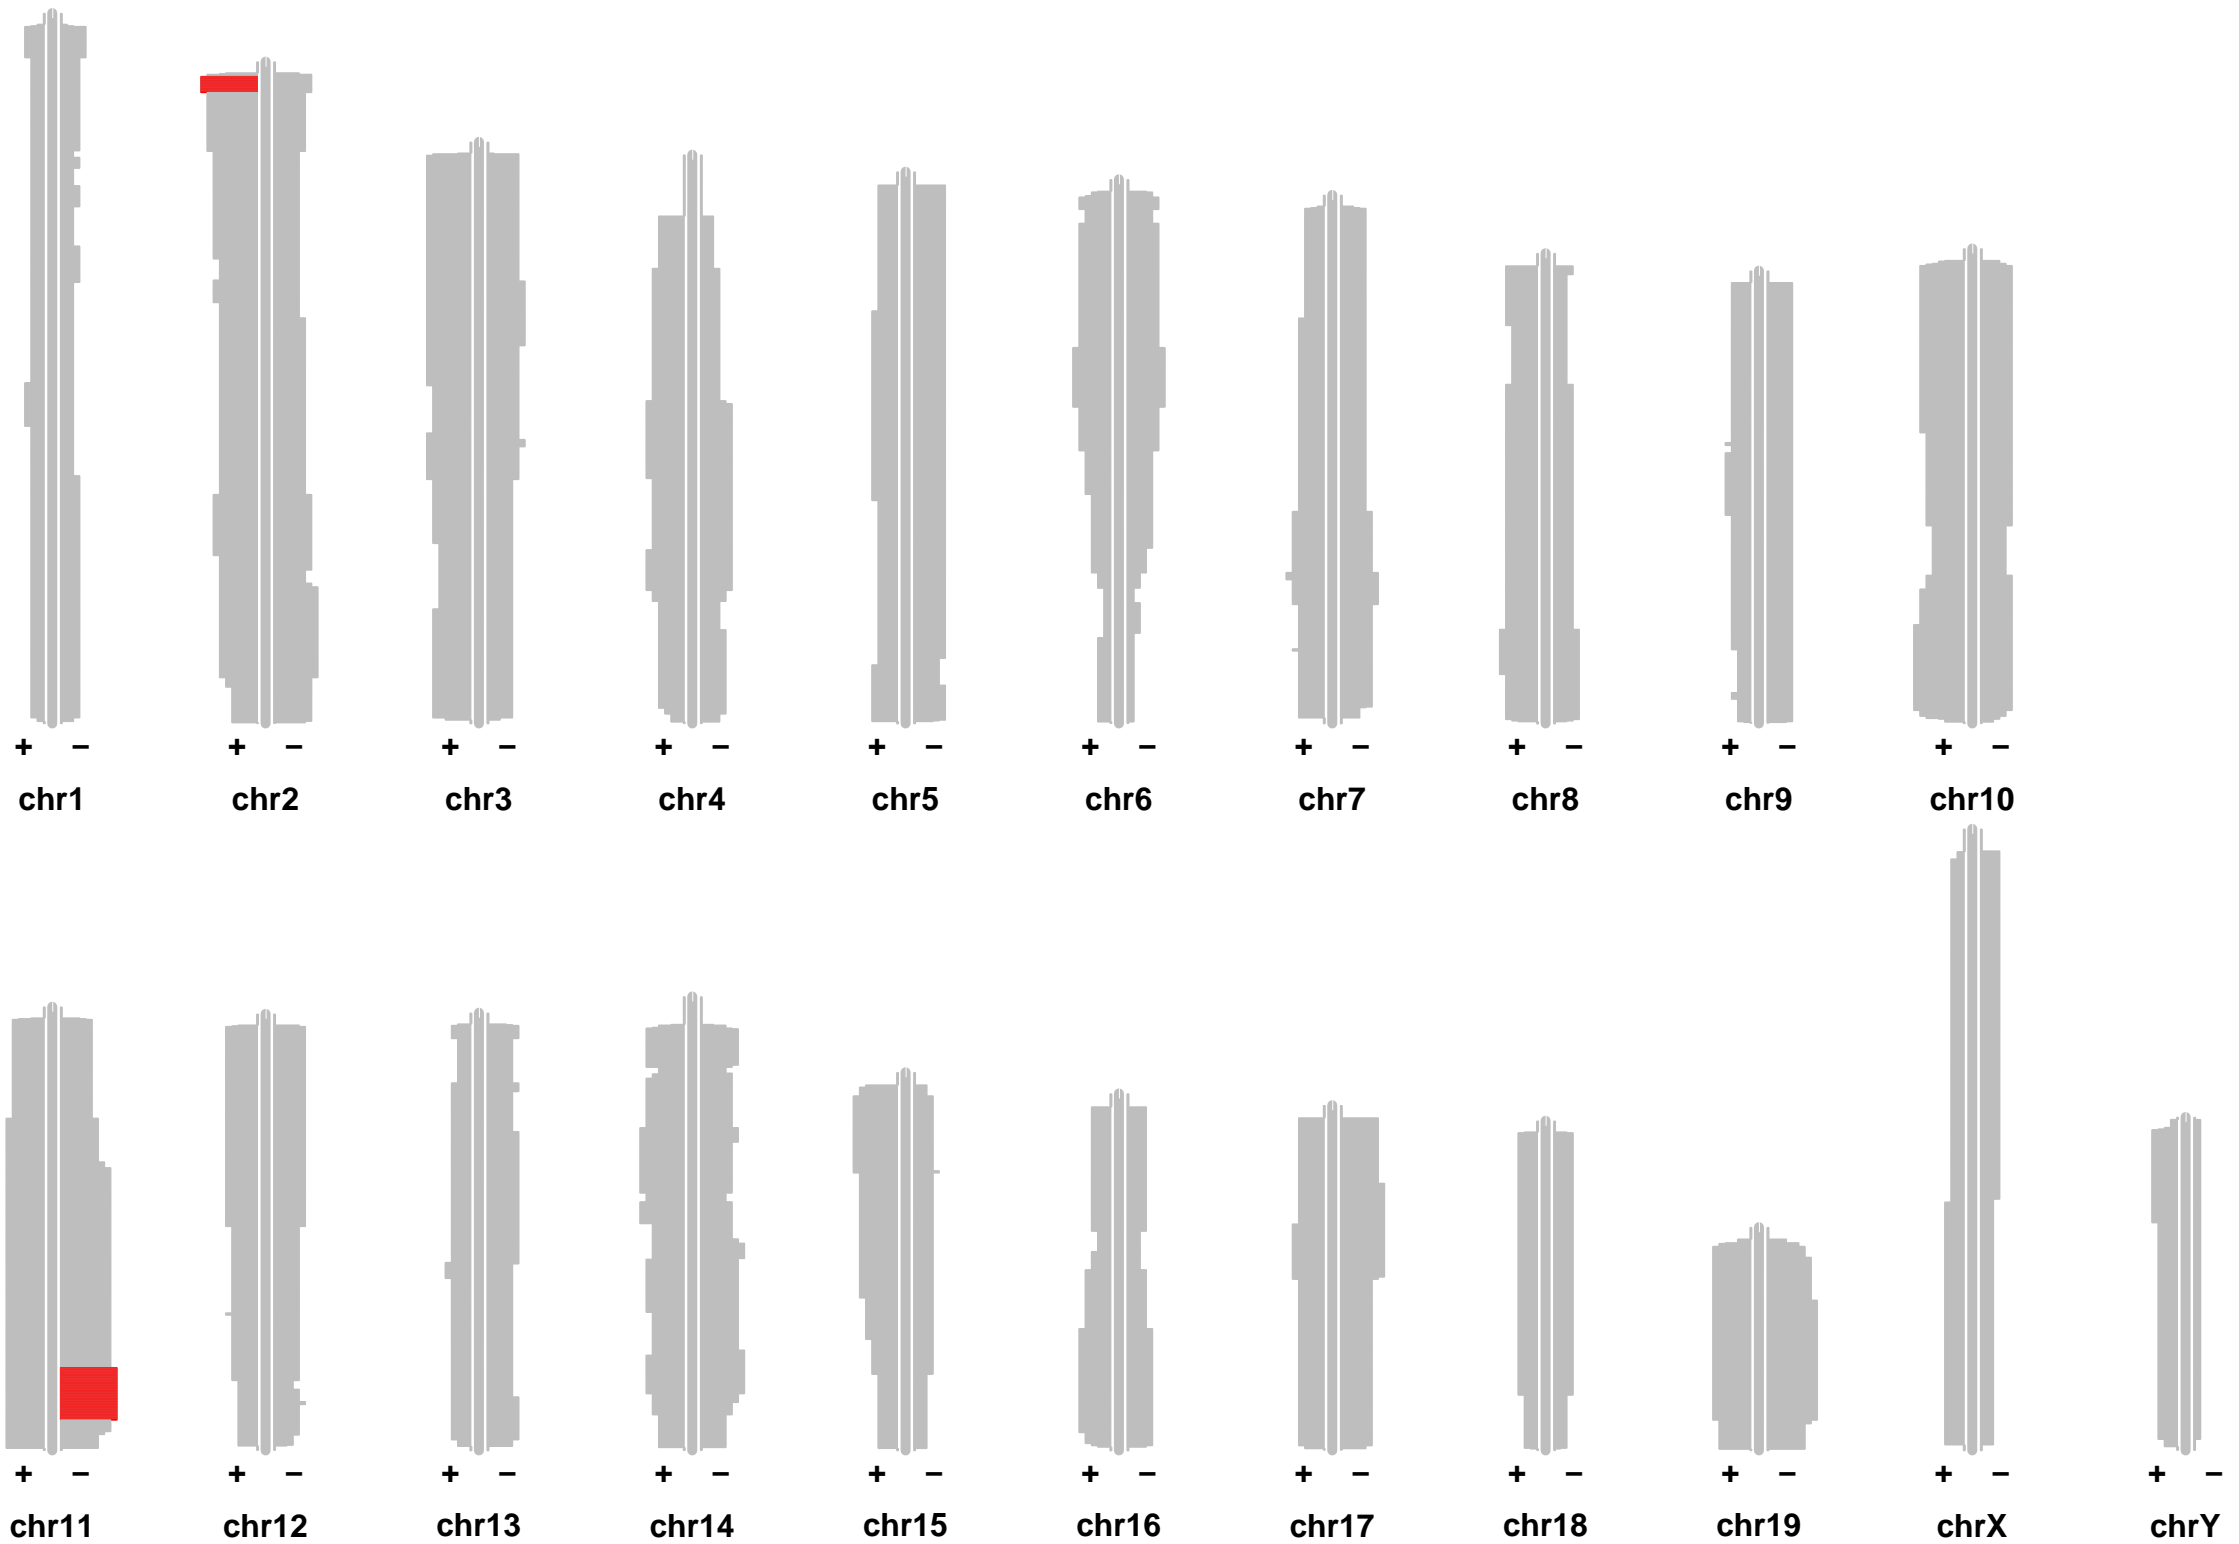

Quality filter=20



Fragment= chrUn\_GL456390 Organism= Mus\_musculus

Peak agreement= 75 %

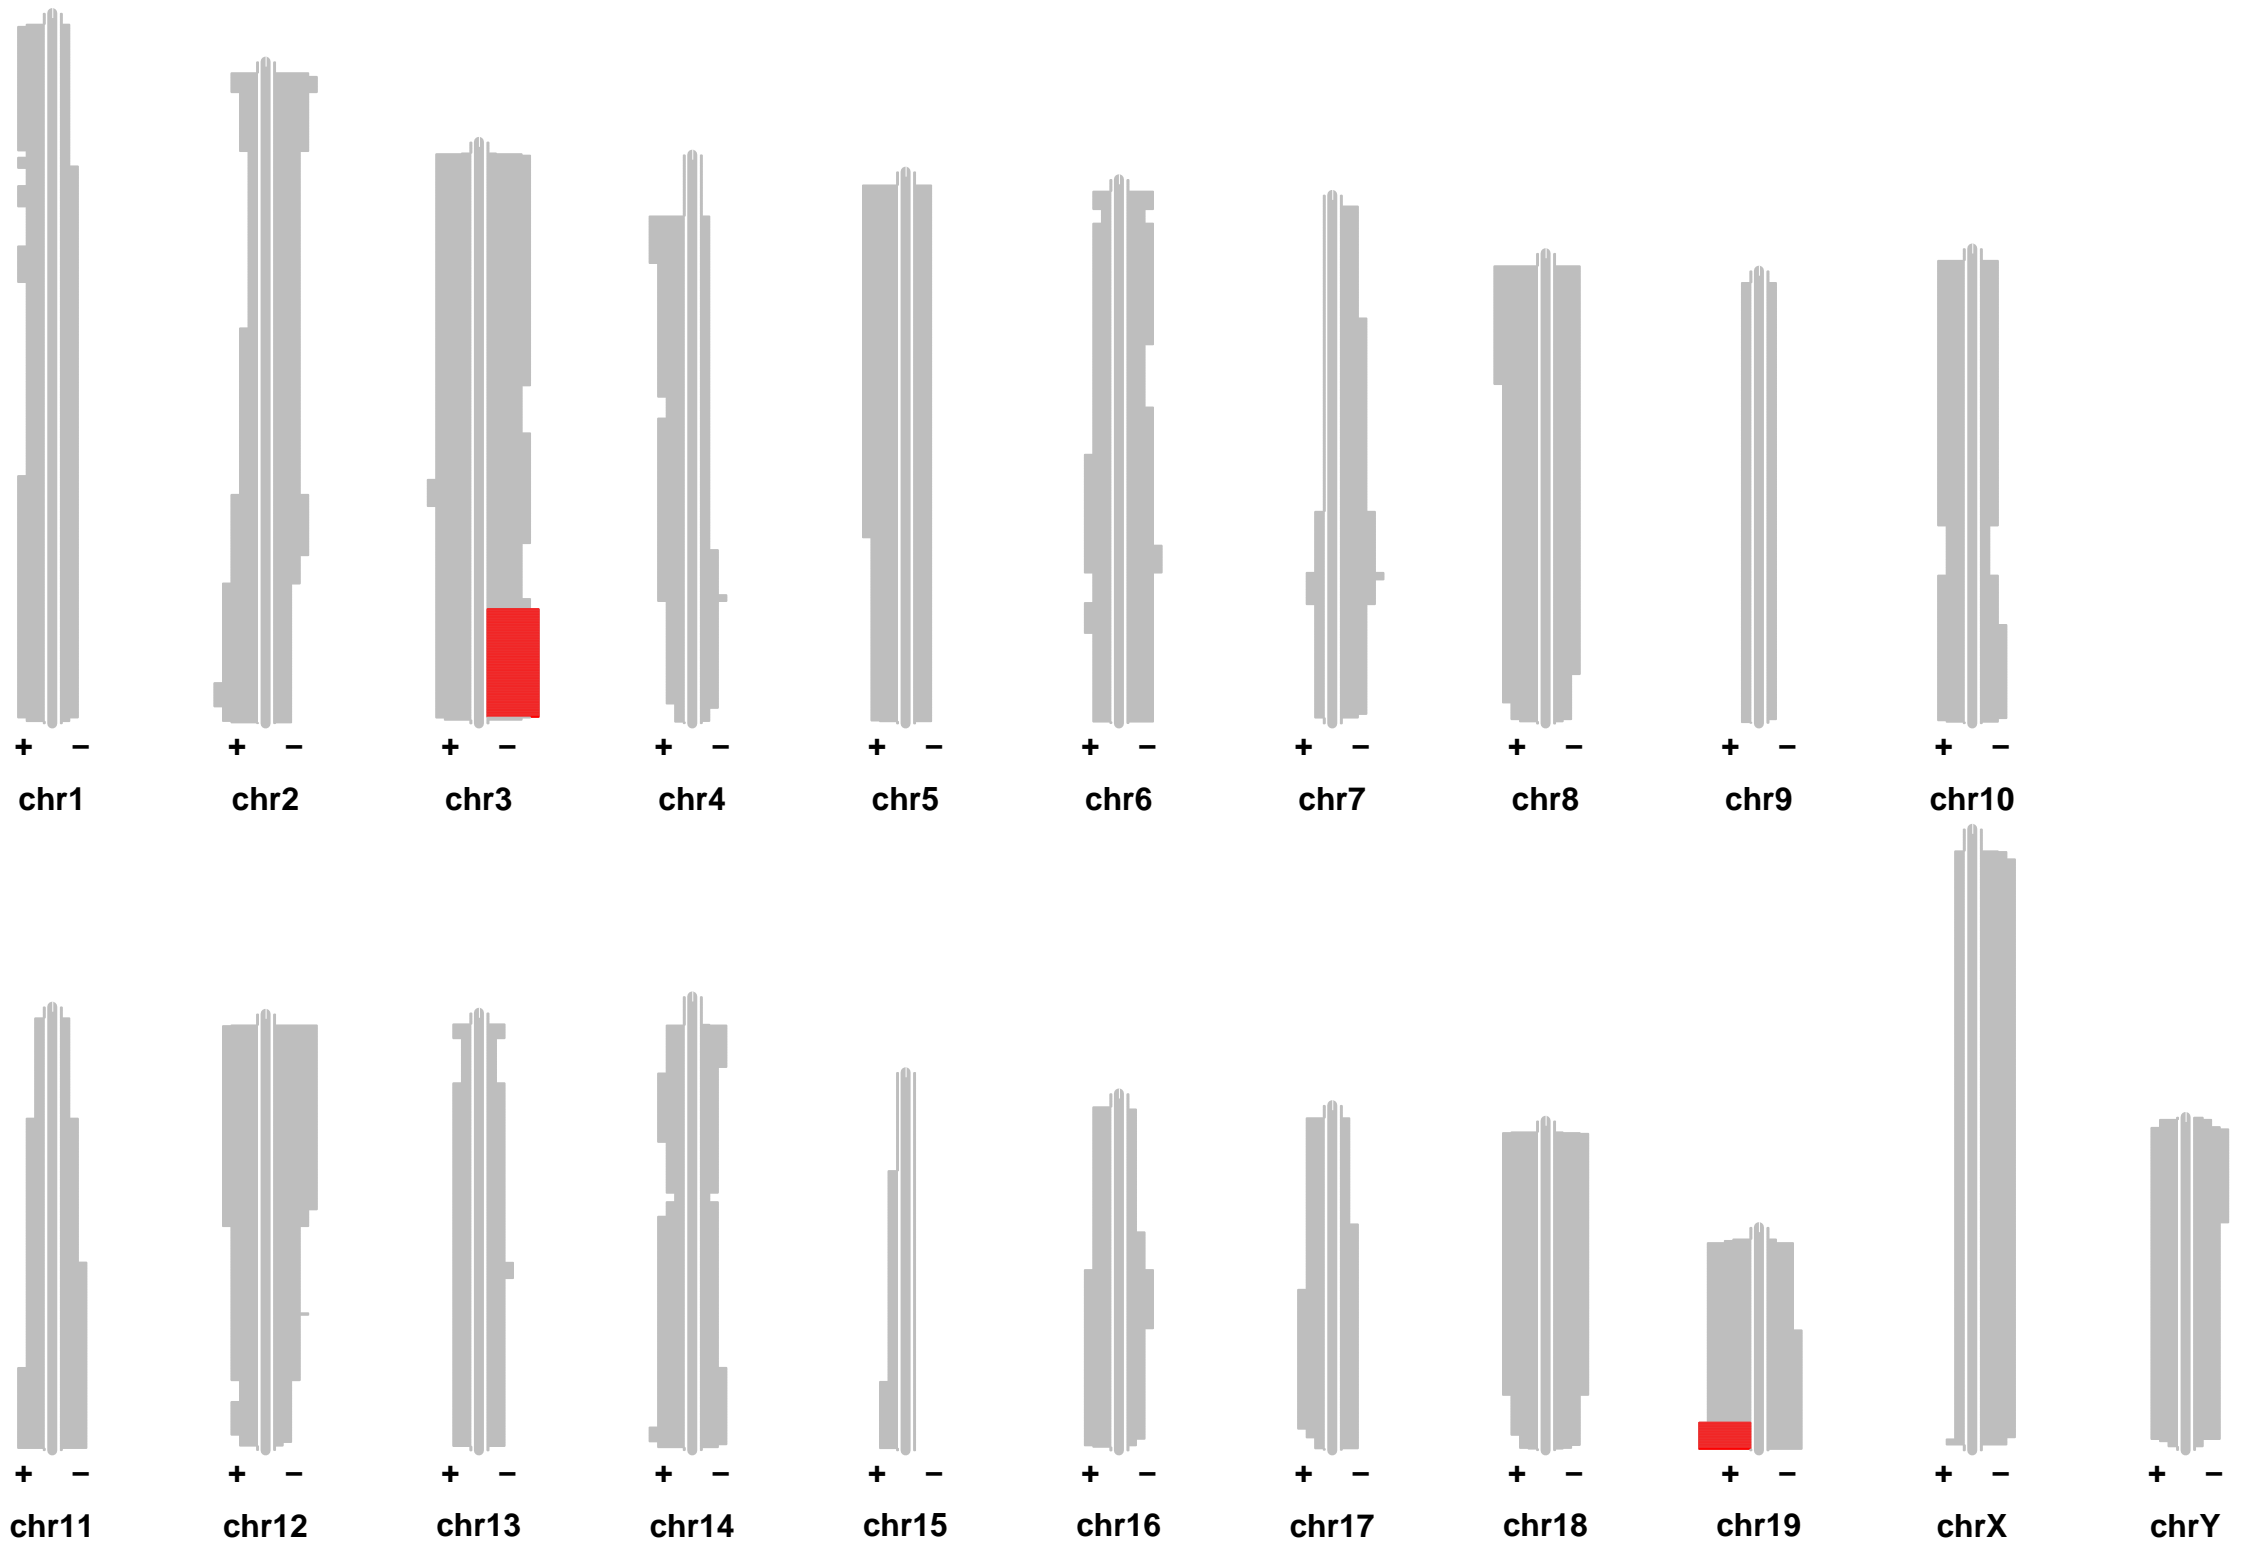

Quality filter=20

Fragment= chr4\_JH584295\_random Organism= Mus\_musculus

Peak agreement= 100 %

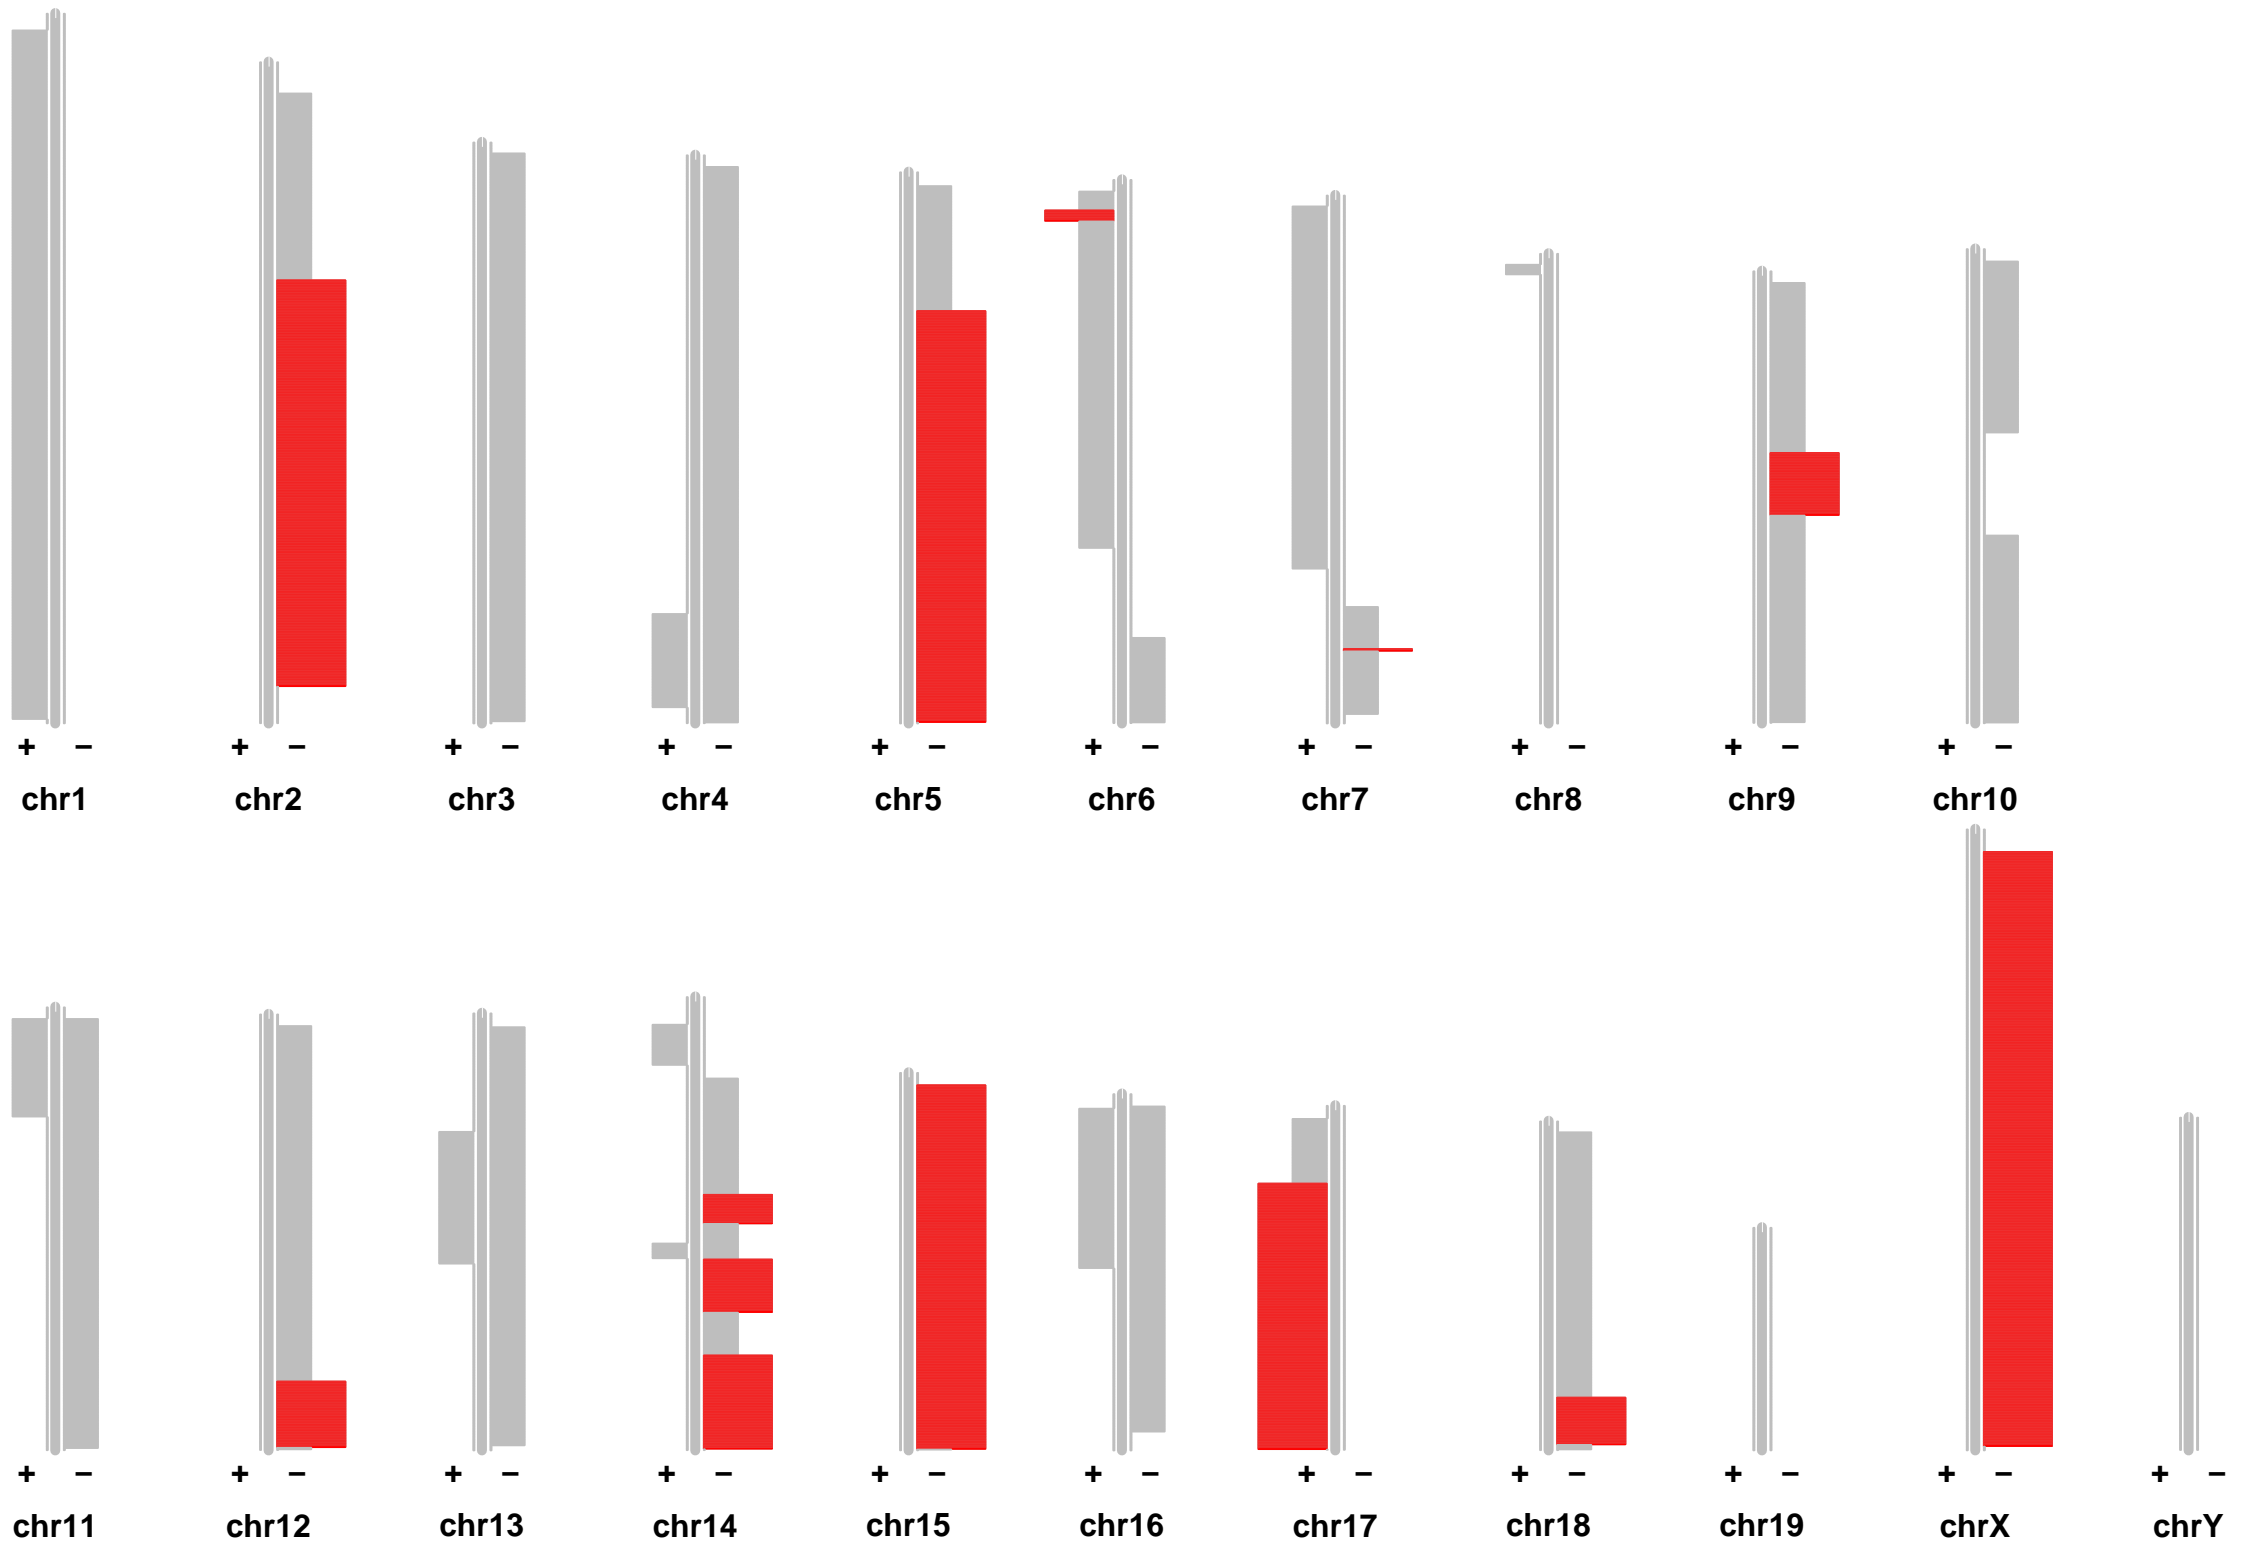

Quality filter=20

Fragment= chr4\_GL456350\_random Organism= Mus\_musculus

Peak agreement= 100 %

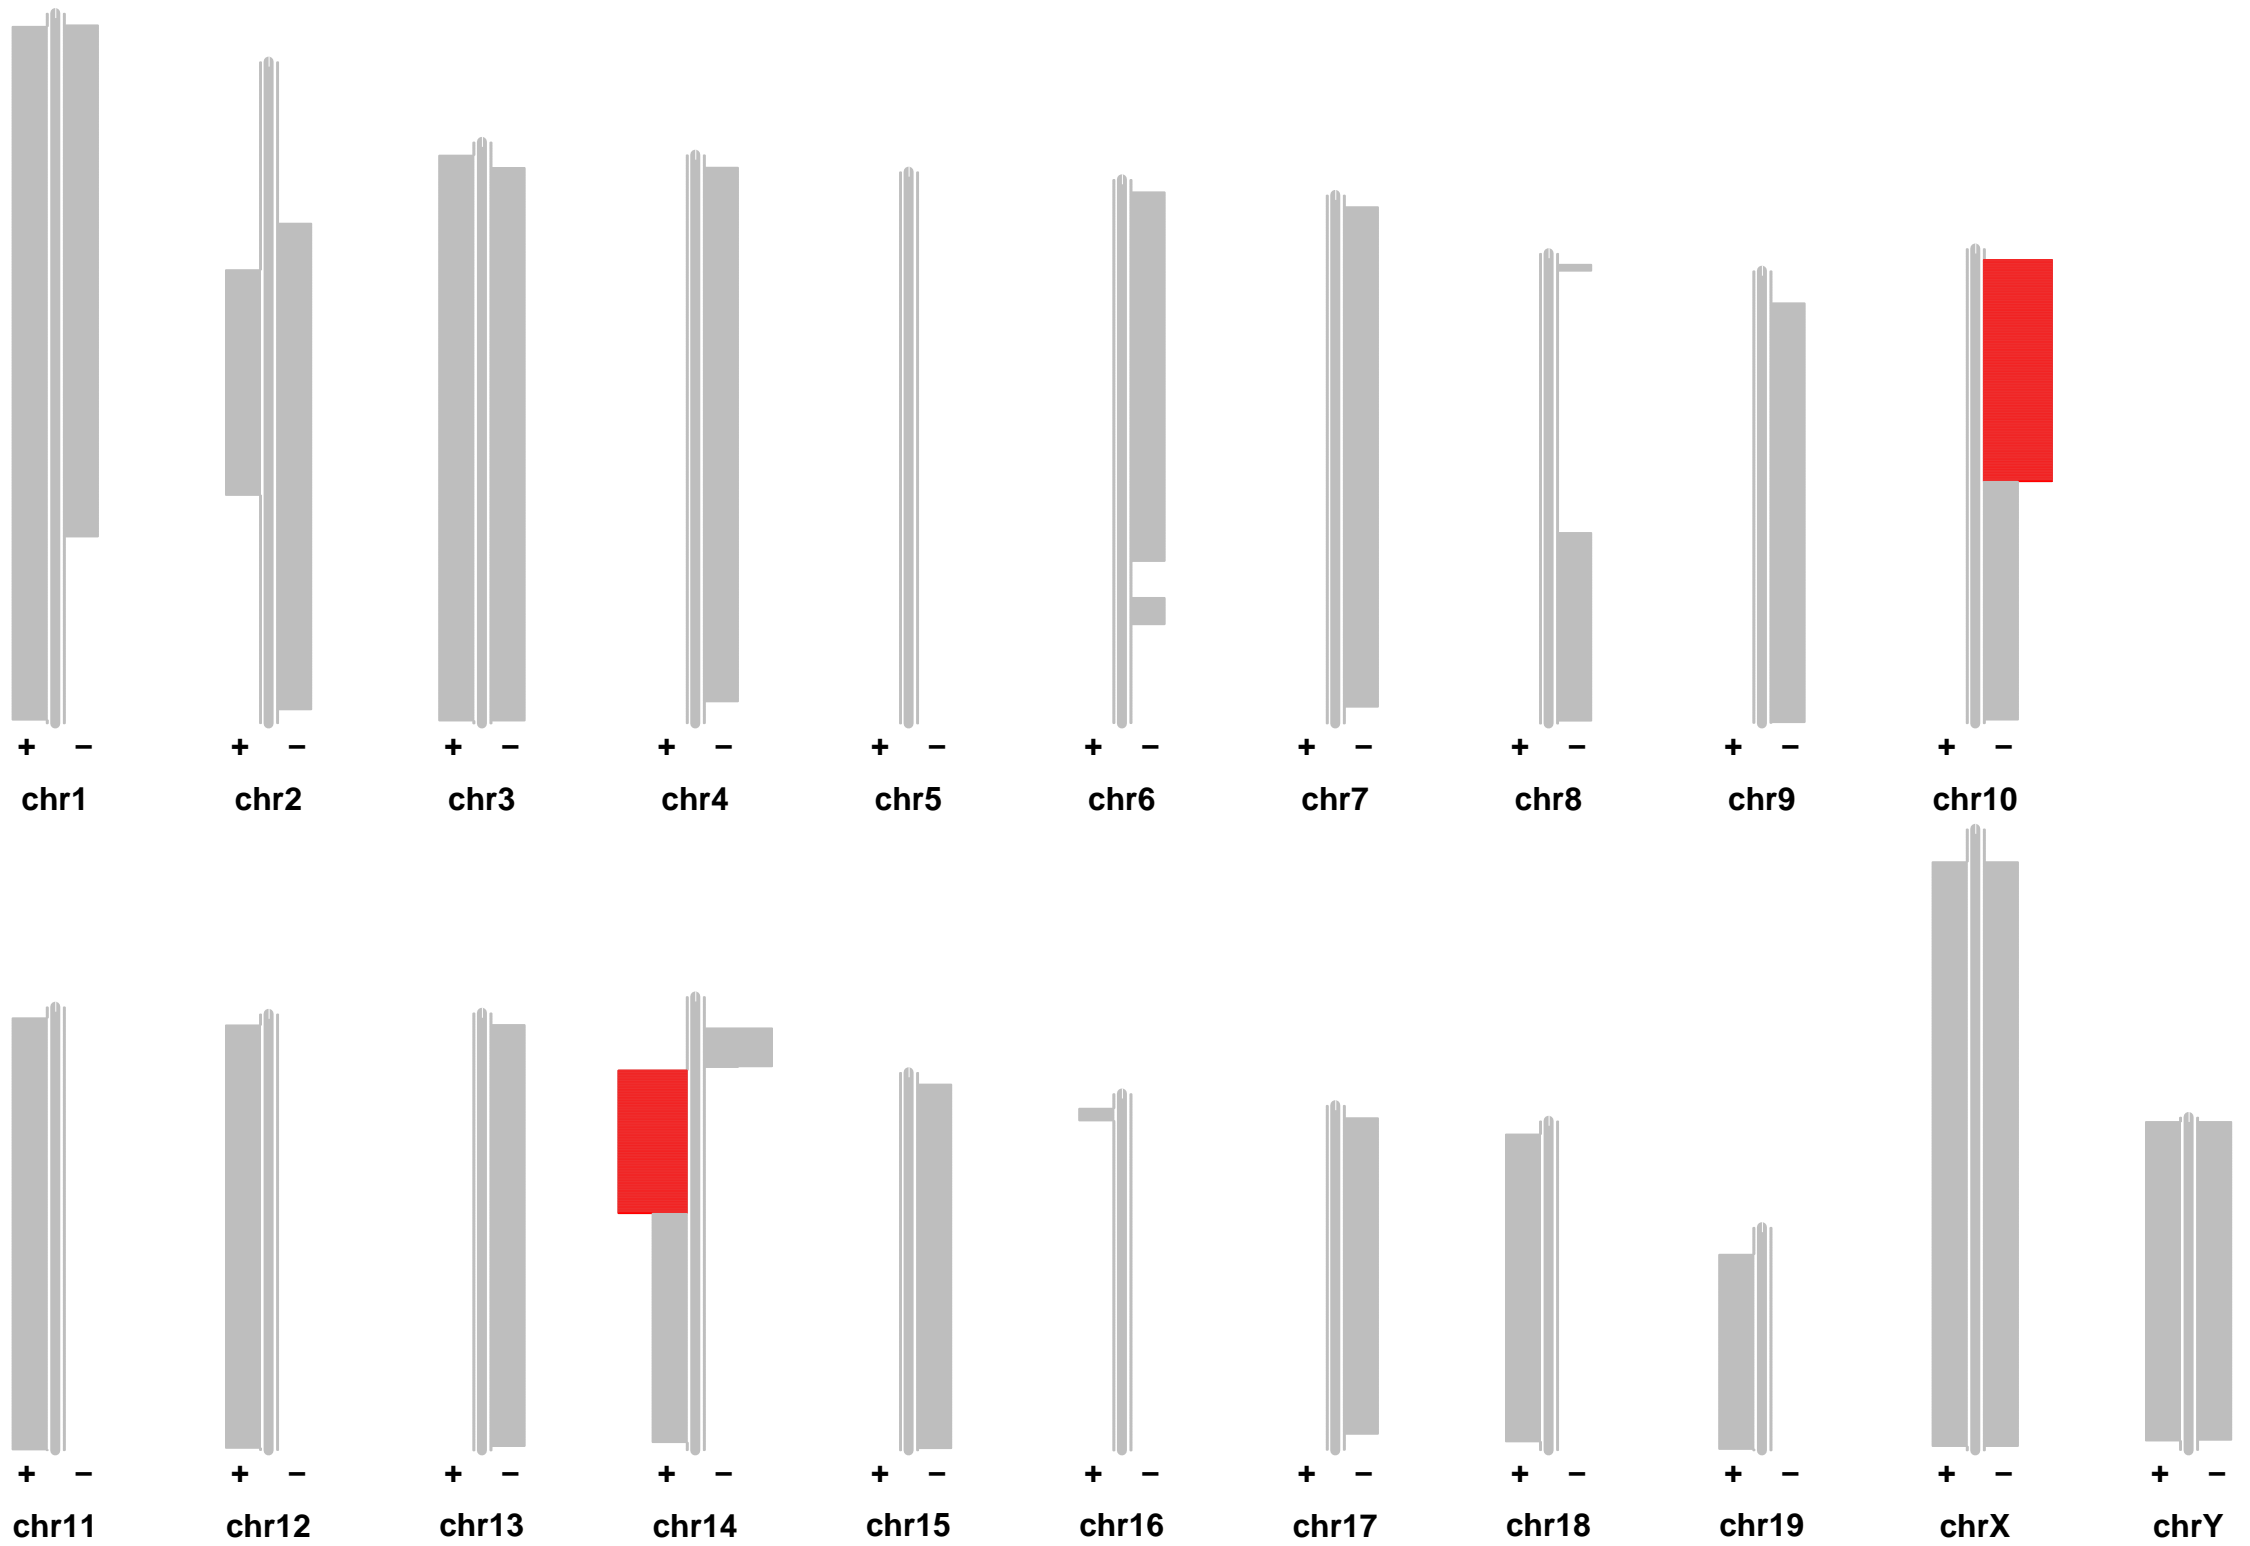

Quality filter=20
